# Supplementary material for: Petrogenesis and geodynamic implications of Ediacaran rocks from the Sirwa massif (Central Anti-Atlas); insights from U-Pb geochronology, whole-rock geochemistry, and Sm-Nd isotopes
Source: Copernicus journal article supplement (doi:10.5194/egusphere-2025-6178), 2025-12-18
Supplement: Supplementary file 1 [file Supplementary data 1_LA-ICP-MS U-Pb analyses.pdf › Supplement/Supplementary data 1_LA-ICP-MS U-Pb analyses.pdf]

**1. Data reporting table for LA-ICP-MS U-Pb analyses**

| <b>Laboratory &amp; Sample Preparation</b>         |                                                                                                                                                |
|----------------------------------------------------|------------------------------------------------------------------------------------------------------------------------------------------------|
| Laboratory name                                    | Geotop, University of Quebec in Montreal                                                                                                       |
| Sample type/mineral                                | Magmatic and detrital zircons                                                                                                                  |
| Sample preparation                                 | Conventional mineral separation, 1 inch resin mount, 1µm polish to finish                                                                      |
| Imaging                                            | Centaurus, Hitachi S-3400N SEM                                                                                                                 |
| <b>Laser ablation system</b>                       |                                                                                                                                                |
| Make, Model & type                                 | Photon-machines G2                                                                                                                             |
| Ablation cell & volume                             | Helix, 2-volume cells                                                                                                                          |
| Laser wavelength (nm)                              | 193 nm                                                                                                                                         |
| Pulse width (ns)                                   | 4 ns                                                                                                                                           |
| Fluence (J.cm <sup>-2</sup> )                      | 3.18 J.cm <sup>-2</sup>                                                                                                                        |
| Repetition rate (Hz)                               | 6 Hz                                                                                                                                           |
| Ablation duration (secs)                           | 30 secs                                                                                                                                        |
| Ablation pit depth / ablation rate                 | Not available                                                                                                                                  |
| Spot diameter (µm)                                 | 30 µm                                                                                                                                          |
| Sampling mode / pattern                            | Static spot ablation n                                                                                                                         |
| Carrier gas                                        | 100% He in the cell                                                                                                                            |
| Cell carrier gas flow (l/min)                      | 0.7 l/min He in the 1 <sup>st</sup> volume cell<br>0.5/min He in the 2 <sup>nd</sup> volume cell                                               |
| <b>ICP-MS Instrument</b>                           |                                                                                                                                                |
| Make, Model & type                                 | ICP-MS (Attom, Nu Instruments)                                                                                                                 |
| Sample introduction                                | Ablation aerosol from laser to torch                                                                                                           |
| RF power (W)                                       | 1300W                                                                                                                                          |
| Make-up gas flow (l/min)                           | 0.3 L/min Ar mixed along the sample transport line to the torch<br>3 ml/min N2 also added before torch                                         |
| Detection system                                   | single ion counter                                                                                                                             |
| Masses measured                                    | 202, 204, 206, 207, 208, 232, 235, 238.                                                                                                        |
| Integration time per peak/dwell times (ms)         | 500ms for each isotope                                                                                                                         |
| Total integration time per output datapoint (secs) | ~0.9secs                                                                                                                                       |
| 'Sensitivity' as useful yield (% , element)        | 0.4% U (NIST610 = 500ppm, #atoms sampled: 500ppm*85um*3Hz*3J/cm <sup>2</sup> , #ions detected: >25 mcps)                                       |
| IC Dead time (ns)                                  | 25 ns                                                                                                                                          |
| <b>Data Processing</b>                             |                                                                                                                                                |
| Gas blank                                          | 15 second on-peak zero subtracted                                                                                                              |
| Calibration strategy                               | 91500 used as primary reference material                                                                                                       |
| Reference Material info                            | 91500 (Wiedenbeck et al. 1995)                                                                                                                 |
| Data processing package used / Correction for LIEF | Iolite4 and IsoplotR softwares.<br>laser-induced elemental fractionation correction assumes reference material and samples behave identically. |
| Mass discrimination                                | N/A - Down-hole effect with iolite.                                                                                                            |
| Common-Pb correction, composition and uncertainty  | No common-Pb correction applied to the data.                                                                                                   |

## Analytical Procedures For LA-ICP-MS U-Pb Analyses

|                                 |                                                                                                                                                                           |
|---------------------------------|---------------------------------------------------------------------------------------------------------------------------------------------------------------------------|
| Uncertainty level & propagation | Ages are quoted at 1 $\sigma$ absolute, propagation is by quadratic addition. Reproducibility and age uncertainty of reference material are propagated where appropriate. |
| Quality control / Validation    | Plesovice, OG1, R33                                                                                                                                                       |

**Table 1 : Data reporting table for LA-ICP-MS U-Pb analyses**

### 2. Analytical procedures for LA-ICP-MS U-Pb geochronology

Hand-picked zircons were annealed in a muffle furnace at 1000 degrees for 48 hours before being mounted in a 1 inch epoxy puck and polished to expose the center of the grains. Zircon grains have then been imaged on a Hitachi S-3400 Variable Pressure SEM using a Centaurus cathodoluminescence (CL) detector at an accelerating voltage of 20 kV to guide the laser spot location. U-Pb analysis was conducted using a Nu Atom single collector mass spectrometer coupled with a Photon Machines G2 193nm excimer laser. The analytical procedures generally followed those outlined in Perrot et al. (2017), with some modifications. Notably, 3 ml/min of N<sub>2</sub> was introduced before the torch to reduce oxide formation in the plasma. Additionally, the mass spectrometer's sensitivity was optimized using U from a NIST610 glass, and gas flows were adjusted to achieve a U/Th ratio of 1 and a Th/ThO ratio of 1.10<sup>-3</sup> for the NIST glass.

We used 91500 (Wiedenbeck et al., 1995) as the primary reference material for the correction of all the U-Pb ratios, while Plesovice (Sláma et al., 2008; Widmann et al., 2019), OG1 (Stern et al., 2009), R33 (Black et al., 2004) were analyzed as a secondary reference material for quality control and validation purposes. Iolite 4 software was used to process the data and for down-hole fractionation correction. Measurements were conducted using a sample-reference material bracketing approach, with packages of 15 unknowns bracketed by 2 primary reference analysis and at least one analysis of the secondary reference grains. Analyses were conducted over 2 sessions, for each of the sessions, the repeated analyses of the secondary reference materials produced ages within 2 $\sigma$  of their respective published ages. All data were processed in Iolite v4 using the laser log file and the U-Pb Geochronology data reduction scheme (DRS) (Paton et al., 2011; Petrus and Kamber, 2012) using an exponential equation to correct for downhole fractionation. Analyses containing detectable 204Pb were removed before data reduction, and no common Pb correction has been applied to the data. After processing the raw data in Iolite v4, Isoplot R (Vermeesch, 2018) was used to generate concordia diagrams and weighted mean ages for samples Zg-106, and Zg-119. Plus, concordia diagram and KDE were generated for sample Zg-132. Ages calculated from the secondary reference material are summarized in Supplementary table 5.

### 3. References for section

Black, L.P., Kamo, S.L., Allen, C.M., Davis, D.W., Aleinikoff, J.N., Valley, J.W., Mundil, R., Campbell, I.H., Korsch, R.J., Williams, I.S., Foudoulis, C.: Improved 206Pb/238U microprobe geochronology by the monitoring of a trace-element-related matrix effect; SHRIMP, ID-TIMS, ELA-ICP-MS and oxygen isotope documentation for a series of zircon standards. Chemical Geology. 205, 115–140, <https://doi.org/10.1016/j.chemgeo.2004.01.003>, 2004.

- Paton, C., Hellstrom, J., Paul, B., Woodhead, J., Hergt, J.: Iolite: Freeware for the visualisation and processing of mass spectrometric data. *Journal of Analytical Atomic Spectrometry*. 26, 2508–2518, <https://doi.org/10.1039/C1JA10172B>, 2011.
- Perrot, M., Tremblay, A., David, J.: Detrital zircon U-Pb geochronology of the Magog Group, southern Quebec—stratigraphic and tectonic implications for the Quebec Appalachians. *American Journal of Science*, 317 (10), 1049–1094, 2017.
- Petrus, J. A., and Kamber, B. S.: VizualAge: A novel approach to laser ablation ICP-MS U-Pb geochronology data reduction. *Geostandards and Geoanalytical Research*, 36(3), 247–270, <https://doi.org/10.1111/j.1751-908X.2012.00158.x>, 2012.
- Sláma J, Košler J, Condon DJ, Crowley JL, Gerdes A, Hanchar JM, Horstwood MS, Morris GA, Nasdala L, Norberg N, Schaltegger U.: Plešovice zircon—a new natural reference material for U–Pb and Hf isotopic microanalysis. *Chemical Geology*. Mar 30;249(1-2):1-35, <https://doi.org/10.1016/j.chemgeo.2007.11.005>, 2008.
- Stern, R. A., Bodorkos, S., Kamo, S. L., Hickman, A. H. and Corfu, F.: Measurement of SIMS Instrumental Mass Fractionation of Pb Isotopes During Zircon Dating. *Geostandards and Geoanalytical Research* 33, 145–168, <https://doi.org/10.1111/j.1751-908X.2009.00023.x>, 2009.
- Vermeesch, P.: IsoplotR: a free and open toolbox for geochronology. *Geoscience Frontiers*, v.9, p.1479-1493, <https://doi.org/10.1016/j.gsf.2018.04.001>, 2018.
- Widmann, P., Davies, J. H. F. L., and Schaltegger, U.: Calibrating chemical abrasion: Its effects on zircon crystal structure, chemical composition and U-Pb age. *Chemical Geology*, 511, 1–10, <https://doi.org/10.1016/j.chemgeo.2019.02.026>, 2019.
- Wiedenbeck MA, Alle P, Corfu FY, Griffin WL, Meier M, Oberli FV, Quadt AV, Roddick JC, Spiegel W.: Three natural zircon standards for U-Th-Pb, Lu-Hf, trace element and REE analyses. *Geostandards newsletter*. Apr;19(1):1-23, <https://doi.org/10.1111/j.1751-908X.1995.tb00147.x>, 1995.
