# Supplementary material for: Petrogenesis and geodynamic implications of Ediacaran rocks from the Sirwa massif (Central Anti-Atlas); insights from U-Pb geochronology, whole-rock geochemistry, and Sm-Nd isotopes
Source: Copernicus journal article supplement (doi:10.5194/egusphere-2025-6178), 2025-12-18
Supplement: Supplementary file 1 [file Supplementary table 3.xlsx]

## Sheet: Table 3
	Samples	Lithology	Sample location type	Outcrop/Drill core coordinates			Drill hole name/mine level	Depth (m)	Short description	Applied methods
				Easting	Northing	Elevation (m)
	Zg-01	Rhyolite	Surface outcrop	7° 73' 52''W	30°76' 78'' N	2178	-	-		Whole-rock
	Zg-02	Micro-granite	Drill core	276572	420787	2187,7	ZG-20-44-Bis	63,20 - 64,00	Belong to the Ougougane magmatic suite (micro-granite, rhyolite) (Toummite et al., 2013)
	Zg-03			276701	420521	2232,3	ZG-20-45	92,70 - 93,00
	Zg-04	Rhyolite	Underground	275798	420262	1976	CA, 1975	-	Tadmant Formation, rhyolite with some ignimbritic passes. Colorless to very pale pink, transparent facies.
	Zg-05	Rhyolitic-ignimbrite		275945	420301	1975	CD, 1975	-
	Zg-06	Rhyolite	Drill core	275683	420474	2002	ZG-20-08	173,70 -174,70
	Zg-07	Quartz-diorite	Drill core	275514	420386	1992	ZG-SO-18-02	673,10-674,10	The Zgounder Mine model accounts for the existence of multiple lithologies. These lithologies are to view from an underground modeling prospective, and they are from East to West (Granophyre, Porphyritic rhyolite, Fine rhyolite, Granite, Granodiorite, Quartz-diorite). All in all, and for modeling consistency and homogeneity, these units were resembled as one, named, the ‘Deep Intrusion’.
	Zg-08	Granodiorite		275683	420474	2002	ZG-20-08	423,80-424,80		Whole-rock + Sm-Nd
	Zg-09			276095	420362	1994,4	ZG-SF-20-15	224,20-247,00		Whole-rock
	Zg-13	Dolerite (Diabase)	Underground	275934	420271	2030	CD, 2030	-	Dike from Mine level 2030, Corps D.
	Zg-14			276282	420285	2105	2 Y BIS 2100	-	Dyke from level 2100, 2Y BIS, very fine texture, advanced chloritization.	Whole-rock + Sm-Nd
	Zg-15			276166	420315	2035	Level 2035	-	Underground level 2035.	Whole-rock
	Zg-97	Ignimbrite	Surface outcrop	7° 42’ 84’’ W	30° 76’ 74’’ N	2269	-	-	Volcano-sedimentary successions of the Ouarzazate Group, East of Zgounder mine, visible fiamme, homogenous texture.
	Zg-98			7° 72’ 69’’ W	30° 76’ 41’’ N	2276	-	-
	Zg-99	Granophyre		7° 73’ 01’’ W	30° 76’ 06’’ N	2239	-	-	Bou-Tazart granite (as in Thomas et al., 2002).
	Zg-103	Gabbro	Surface outcrop	7° 73’ 97’’ W	30° 77’ 11’’ N	2107	-	-	Tittalt Formation, Saghro Group mafic and intermediate terms, visible pyrite as disseminations (see Thomas et al., 2002).
	Zg-105	Gabbro		7° 74’ 33’’ W	30° 77’ 46’’ N	2113	-	-		Whole-rock + Sm-Nd
	Zg-106	Rhyolite	Surface outcrop	7° 71’ 70’’ W	30° 78’ 88’’ N	2278	-	-	facies with a N175° fluidity/sub-vertical; showing lava flow structure, in contact with the basic terms of the Tittalt Formation (Saghro Group).	Whole-rock + Sm-Nd + U-Pb
	Zg-107	Dolerite	Surface outcrop	7° 72’ 05’’ W	30° 78’ 95’’ N	2288	-	-	East of Tittalt village, lower unit of Saghro Group.	Whole-rock
	Zg-108	Andesite		7° 73’ 12’’ W	30° 79’ 08’’ N	2268	-	-	Center of Tittalt village, lower unit of Saghro Group.	Whole-rock + Sm-Nd
	Zg-109	Micro-granite	Drill core	274755	420438	2077	ZG-21-09	271,50-279,00	Micro-granite sample from the 'deep intrusion'	Whole-rock
	Zg-110	Porphyritic-rhyolite	Drill core	275463	420410	1993,81	ZG-21-03	213,90-224,00	Zgounder Mine Western sector, Tadmant Formation_Bou-Salda Group (Thomas et al., 2002)
	Zg-111	Rhyolitic-ignimbrite		275259	420437	1986,08	ZG-21-05	390,00-421,00
	Zg-112	Rhyolite	Surface outcrop	7° 75’ 32’’ W	30° 76’ 96’’ N		-	-	Rhyolitic plug, belonging to the Ougougane suite (Pelleter et al., 2016).
	Zg-113	Rhyolite		7° 75’ 54’’ W	30° 76’ 92’’ N		-	-
	Zg-115	Granite	Drill core	276547	420395	2227,75	ZG-21-31	295,60-297,30	greenish to light pink fine to medium grained granite 'deep intrusion'.
	Zg-117	Rhyolite	Drill core	276256	420278	2202,68	ZG-20-40	76,30 to 76,45	Homogenous microcrystalline texture with brown matrix, locally glassy, with visible fiamme.	Whole-rock + Sm-Nd
	Zg-119	Granite	Drill core	276064	420210	2122,84	ZG-20-21	555,30-568,50	Fine to medium-grained texture, age similarities with the neighboring Imourkhssen granite (as in Thomas et al., 2002).	Whole-rock + Sm-Nd + U-Pb
	Zg-002	Basaltic-andesite	Surface outcrop	7° 74’ 68'' W	30° 78' 56'' N	-	-	-	Tittalt Formation, the lower unit of Saghro Group, mafic to intermediate units (Thomas et al., 2002).	Whole-rock
	Zg-003			7° 74’ 21'' W	30° 78' 46'' N	-	-	-
	Zg-004			7° 74’ 53'' W	30° 79' 05'' N	-	-	-
	Zg-006	Basalt		7° 75’ 06'' W	30° 78' 24'' N	-	-	-
	Zg-132	Sandstone	Surface outcrop	7° 74’ 13'' W	30° 76' 33'' N	-	-	-	Sandstone sample from the Imghi Formation of Saghro Group of Thomas et al., (2002).	U-Pb on detrital zircon
	Note:	Coordinates for surface samples are provided in Degrees, Minutes, Seconds (DMS) format, (CRS : EPSG:4326 - WGS 84). Coordinates for underground and drill hole samples are given in local projection (Zgounder Mine projection)
