# Supplementary material for: Petrogenesis and geodynamic implications of Ediacaran rocks from the Sirwa massif (Central Anti-Atlas); insights from U-Pb geochronology, whole-rock geochemistry, and Sm-Nd isotopes
Source: Copernicus journal article supplement (doi:10.5194/egusphere-2025-6178), 2025-12-18
Supplement: Supplementary file 3 [file Supplementary table 4.xlsx]

## Sheet: Saghro Group rocks
Saghro Group rocks (SG)
Samples	Zg-108	Zg-006	Zg-107	Zg-103	Zg-002	Zg-004	Zg-003	Zg-105
Major elements (wt. %)
SiO2	61.15	52.87	52.3	49.24	52.67	50.95	50.39	48.85
Al2O3	14.25	14.62	13.44	13.91	15.21	14.6	14.98	15.65
Fe2O3	7.82	9.6	14.79	13.22	9.77	9.88	9.86	12.34
MnO	0.14	0.214	0.305	0.279	0.183	0.205	0.231	0.315
MgO	1.08	6.77	4.53	6.48	7.45	6.83	7.06	6.08
CaO	3.71	4.45	6.01	8.76	6.84	8.77	7.34	9.65
Na2O	3.38	2.82	3.93	3.73	3.3	3.45	3.34	2.82
K2O	3.07	1.55	0.47	0.82	0.88	1.18	1.51	1.3
TiO2	1.226	1.497	2.075	1.686	1.159	1.242	1.132	1.567
P2O5	0.43	0.43	0.24	0.16	0.19	0.14	0.14	0.13
LOI	3.13	3.96	2.39	2.23	2.9	2.86	2.74	2.02
Total	99.39	98.78	100.5	100.5	100.5	100.1	98.72	100.7
Mg Nbr	12.1348	41.3561	23.4472	32.8934	43.2636	40.8737	41.7258	33.0076
Trace elements including REE (ppm)
Sc	16	26	41	46	32	33	32	44
Be	2	1	1	1	1	1	1	1
V	32	174	337	310	198	219	201	268
Ba	921	758	232	251	292	310	342	251
Sr	181	168	308	277	238	269	208	225
Y	40	25	38	27	22	23	22	21
Zr	279	146	174	117	109	101	103	93
Cr	120	250	60	230	400	440	430	280
Co	11	35	41	51	61	50	47	27
Ni	30	80	20	100	20	30	30	80
Cu	40	20	110	100	10	10	10	20
Zn	90	210	270	210	90	160	230	150
Ga	24	20	19	19	20	18	20	17
Ge	1	1	2	1	1	2	1	1
As	14	43	37	50	113	78	83	53
Rb	85	61	12	28	36	54	73	55
Nb	21	14	11	9	8	7	7	6
Mo	11	2	4	9	2	2	2	12
Ag	2.4	0.5	0.7	0.5	0.5	0.5	0.5	0.5
In	0.2	0.2	0.2	0.2	0.2	0.2	0.2	0.3
Sn	2	1	1	1	1	1	1	2
Sb	0.9	3.6	3.2	1.2	12.6	3.5	2.9	4.8
Cs	3.5	0.5	0.5	0.5	0.8	0.5	0.5	1.1
La	40	20.6	17.2	9.5	13.1	10.6	12.2	6.5
Ce	88.2	43	38.6	22.3	26.9	22.5	26	17
Pr	11.2	5.31	5.12	3.07	3.35	2.88	3.24	2.58
Nd	46.9	21.2	22.7	14.5	14.1	12.8	13.5	13.2
Sm	10.4	4.8	6.1	4	3.5	3.4	3.5	3.8
Eu	2.98	1.42	2.01	1.4	1.19	1.14	1.09	1.63
Gd	9.3	5	6.5	4.7	3.9	3.8	4	4
Tb	1.6	0.8	1.2	0.8	0.6	0.6	0.6	0.8
Dy	9.1	4.7	7.5	5.3	4.1	4.2	4.1	4.7
Ho	1.8	0.9	1.5	1.1	0.8	0.8	0.8	0.9
Er	4.8	2.6	4.2	3.2	2.4	2.5	2.5	2.7
Tm	0.68	0.35	0.61	0.44	0.34	0.37	0.34	0.37
Yb	4.2	2.2	3.9	2.7	2.2	2.3	2.3	2.4
Lu	0.61	0.37	0.57	0.43	0.37	0.35	0.35	0.36
Hf	6.1	3.8	3.7	2.7	2.8	2.5	2.6	2.1
Ta	2	1.1	0.8	0.6	0.9	0.7	0.7	0.5
W	1	83	1	1	254	167	119	1
Tl	0.3	0.2	0.2	0.1	0.1	0.2	0.2	0.3
Pb	41	21	44	24	10	7	6	8
Bi	0.4	0.4	0.4	0.4	0.4	0.4	0.4	0.4
Th	5.3	3.2	2.1	1.1	2.2	1.6	2.1	0.8
U	1.9	1.1	0.7	0.4	0.8	0.7	0.8	0.3
Th/Ce	0.0600907	0.0744186	0.0544041	0.0493274	0.0817844	0.0711111	0.0807692	0.0470588
Th/La	0.1325	0.15534	0.122093	0.115789	0.167939	0.150943	0.172131	0.123077
Ce/Pb	2.15122	2.04762	0.877273	0.929167	2.69	3.21429	4.33333	2.125
Nb/U	11.0526	12.7273	15.7143	22.5	10	10	8.75	20
La/Sm	3.84615	4.29167	2.81967	2.375	3.74286	3.11765	3.48571	1.71053
Nb/Th	3.96226	4.375	5.2381	8.18182	3.63636	4.375	3.33333	7.5
Nb/Zr	0.0752688	0.0958904	0.0632184	0.0769231	0.0733945	0.0693069	0.0679612	0.0645161
Ba/Th	173.774	236.875	110.476	228.182	132.727	193.75	162.857	313.75
Nb/La	0.525	0.679612	0.639535	0.947368	0.610687	0.660377	0.57377	0.923077
Rb/Zr	0.304659	0.417808	0.0689655	0.239316	0.330275	0.534653	0.708738	0.591398
Binary mixing model for contamination
143Nd/144Nd samples	0.51255	x	x	x	x	x	x	0.512762
eNd samples	3.2	x	x	x	x	x	x	4.5
143Nd/144Nd mantle	x	x	x	x	x	x	x	x
eNd mantle	7.63	x	x	x	x	x	x	8.41
143Nd/144Nd crust	-16.01	x	x	x	x	x	x	-16.01
eNd crust	0.511472	x	x	x	x	x	x	x
Mantle portion in the sample	0.812606	x	x	x	x	x	x	0.839885
Crust portion	0.187394	x	x	x	x	x	x	0.160115
x	not analyzed for Sm-Nd isotope data

## Sheet: Ouarzazate Group rocks
Ouarzazate Group rocks (OG)
Samples	Zg-112	Zg-113	Zg-05	Zg-106	Zg-01	Zg-111	Zg-117	Zg-06	Zg-110	Zg-04	Zg-98	Zg-97	Zg-15	Zg-14	Zg-13	Zg-109	Zg-02	Zg-115	Zg-119	Zg-03	Zg-99	Zg-07	Zg-08	Zg-09
Major elements (wt. %)
SiO2	77.87	77.52	77.28	76.97	75.93	75.87	75.7	75.59	75.07	74.36	70.58	68.74	51.56	50.74	50.58	79.89	78.49	74.16	73.71	71.96	71.63	65.92	61.44	61.16
Al2O3	11.84	12.15	11.96	12.1	12.28	11.83	11.64	11.64	12.08	12.04	15.18	14.58	13.92	14.69	13.9	10.83	12.01	12.88	12.88	13.32	13.07	13.83	14.72	14.24
Fe2O3	1.64	1.46	2.06	1.17	2.43	2.35	2.63	2.42	2.15	2.87	3.54	3.93	13.7	13.22	14.25	1.34	1.74	1	2.16	2.26	2.62	5.16	6.77	7.64
MnO	0.012	0.014	0.024	0.021	0.018	0.021	0.016	0.015	0.026	0.074	0.032	0.031	0.378	0.48	0.321	0.017	0.015	0.015	0.036	0.03	0.042	0.104	0.141	0.133
MgO	0.06	0.1	0.17	0.22	0.18	0.26	0.11	0.1	0.15	0.29	0.26	0.38	4.56	4.97	5.3	0.15	0.13	0.65	0.35	0.71	0.48	1.8	2.5	2.83
CaO	0.1	0.15	0.18	0.35	0.11	0.15	0.18	0.17	0.14	1.36	0.51	0.49	7.67	5.61	7.37	0.23	0.13	0.1	0.2	0.27	0.51	2.95	3.26	4.42
Na2O	3.53	2.73	3.73	0.37	2.86	4.11	3.67	3.58	3.61	2.61	4.57	3.83	2.82	3.26	2.92	5.22	6.35	3.36	4.22	3.16	3.36	3.5	3.35	3.19
K2O	4.91	5.62	4.46	7.68	4.99	3.56	4.8	4.74	4.83	4.17	4.23	4.99	0.76	2.38	1.43	1.09	0.91	5.43	3.73	5.81	5.38	3.95	3.61	3.24
TiO2	0.137	0.142	0.161	0.055	0.174	0.148	0.154	0.15	0.151	0.206	0.404	0.368	3.075	3.073	3.113	0.133	0.152	0.212	0.236	0.462	0.362	0.771	1.132	1.09
P2O5	0.01	0.03	0.01	0.03	0.02	0.01	0.01	0.01	0.01	0.03	0.06	0.05	0.35	0.34	0.36	0.01	0.01	0.03	0.03	0.13	0.09	0.23	0.39	0.37
LOI	0.44	0.64	0.47	1.3	1.02	0.62	0.39	0.28	0.53	0.57	0.85	0.9	1.18	1.67	1.14	0.83	0.47	0.89	0.99	1.2	1.04	1.12	1.9	0.96
Total	100.6	100.6	100.5	100.3	100	98.91	99.28	98.7	98.73	98.58	100.2	98.3	99.99	100.4	100.7	99.74	100.4	98.73	98.55	99.3	98.58	99.35	99.2	99.26
Trace elements including REE (ppm)
Sc	1	1	2	4	2	1	2	1	1	2	10	9	31	32	31	1	1	4	5	7	7	12	16	16
Be	2	1	3	7	1	2	3	3	3	4	1	2	2	3	2	3	1	11	4	2	3	3	3	2
V	5	5	5	5	5	5	5	5	5	6	14	8	258	268	261	5	9	16	12	22	25	74	121	123
Ba	603	806	928	1456	601	689	837	835	813	1652	1614	1543	300	1270	563	107	99	456	619	864	680	772	791	705
Sr	22	29	62	30	23	36	53	52	45	163	123	151	300	244	293	39	30	21	70	65	67	182	242	252
Y	57	35	42	95	44	51	55	54	47	66	33	27	30	31	29	40	48	101	54	41	45	49	45	47
Zr	277	276	271	116	263	253	262	270	238	233	284	292	186	185	188	257	220	149	145	310	197	310	301	303
Cr	260	180	210	180	140	300	260	290	250	200	190	210	140	130	120	300	320	210	20	180	160	180	130	130
Co	2	2	1	8	2	4	1	1	3	1	5	6	40	46	38	4	2	3	109	5	6	11	17	19
Ni	50	40	20	50	40	50	20	20	40	20	30	40	50	60	50	60	60	40	20	30	30	30	40	50
Cu	30	40	10	10	20	10	10	90	40	10	30	10	50	20	10	10	10	10	10	30	40	20	30	40
Zn	30	30	30	30	30	30	30	30	30	100	30	30	340	540	330	30	30	30	30	240	60	120	190	210
Ga	21	21	20	22	24	19	20	20	20	21	17	19	21	22	21	17	17	21	20	20	18	18	19	19
Ge	1	1	1	2	1	1	1	1	1	1	1	1	1	1	1	1	1	1	1	1	1	1	1	2
As	5	5	5	28	5	7	5	5	9	8	12	18	30	49	16	17	5	5	5	11	11	6	6	24
Rb	115	154	105	253	143	68	115	117	122	125	108	145	29	88	56	26	18	134	86	144	169	112	98	103
Nb	24	24	22	54	18	18	18	15	16	15	8	8	18	18	18	21	17	18	15	16	11	10	10	11
Mo	21	15	15	21	14	22	17	19	18	12	15	16	5	3	4	24	27	21	3	15	13	11	7	7
Ag	0.5	0.5	1	0.5	1.2	0.5	0.5	0.9	0.5	1	31	0.5	2.5	100	0.9	0.5	1.2	0.5	0.5	5.2	0.8	1.5	1.6	2
In	0.2	0.2	0.2	0.2	0.2	0.2	0.2	0.2	0.2	0.2	0.2	0.2	0.2	0.2	0.2	0.2	0.2	0.2	0.2	0.2	0.2	0.2	0.2	0.2
Sn	4	4	5	15	5	4	4	4	3	4	2	2	2	1	1	2	4	7	5	5	4	3	4	6
Sb	0.5	0.5	0.5	8.2	0.5	0.5	0.5	0.7	0.5	1	1.8	2.1	3	1.9	0.8	0.5	0.6	0.5	0.5	0.5	0.9	0.5	0.6	1.2
Cs	0.5	0.8	0.6	1.5	0.9	0.7	0.7	0.7	1	2.3	2	2.5	1.9	1.5	1	2.4	1	0.7	1.1	1.2	1	2.4	1.7	5.3
La	69.2	29.4	55.5	19.4	36.2	133	59.2	49.5	41.1	51.8	17.1	16.4	24.9	23.8	24.2	38.5	69.9	51.4	44.5	61	40.2	45.3	42.6	42.2
Ce	94.1	67.3	112	59.5	70.7	284	126	104	84.4	111	38.2	33.8	53.3	52.2	52.5	76.8	137	109	95.3	122	76.9	97.6	90.2	91.8
Pr	16.5	7.28	13.2	8.66	9.57	33	14.9	12	10.6	13.3	4.55	3.98	6.84	6.65	6.61	9.35	16.2	12.9	11.3	14.6	10.1	11.9	11.1	11.6
Nd	63.4	27.4	50.5	34.7	36.1	126	56.7	48.1	41.3	53.5	18.5	15.6	29.4	28.8	29	36.4	63.1	52.2	43.5	55.7	37.9	47.3	44.9	47.9
Sm	13.7	6	10.2	11.8	7.5	23.3	12.3	10.1	9.6	11.8	4.9	4	6.4	6.6	6.5	7.8	11.9	14.8	9.6	11.8	8.1	9.5	9.4	10.1
Eu	1.48	0.83	1.46	0.15	0.86	2.85	1.69	1.35	1.31	1.37	0.88	0.71	1.98	1.85	1.86	1.21	1.29	1.88	0.97	1.47	0.96	1.52	1.72	1.85
Gd	13.3	5.4	8.6	12.2	6.3	15.1	10.3	9.4	8.3	10.2	4.4	3.8	6	6.2	6	7.4	9.4	15.2	8.1	9.5	6.6	8.4	8.1	8.5
Tb	2	1	1.4	2.8	1.2	2.3	1.8	1.6	1.6	1.7	0.8	0.7	1	1	0.9	1.3	1.4	2.8	1.5	1.5	1.3	1.3	1.3	1.4
Dy	11.5	6.8	8.1	19.3	8.3	12.2	11.5	9.8	10.2	10.3	5.6	5	5.6	5.8	5.4	7.9	8.4	18.1	9.8	9.2	8.5	8	7.5	8
Ho	2.2	1.4	1.6	4.1	1.8	2.2	2.3	2	2.1	2.1	1.2	1.1	1.1	1.1	1	1.6	1.7	3.5	2	1.7	1.7	1.5	1.5	1.6
Er	5.9	4.4	4.7	12.8	5.4	5.7	6.7	5.7	6.3	6	3.8	3.5	2.9	3.2	3	4.6	4.8	10.8	6.3	5.1	5.2	4.6	4.4	4.7
Tm	0.8	0.68	0.69	2.04	0.83	0.8	0.94	0.84	0.96	0.85	0.58	0.56	0.41	0.43	0.41	0.74	0.73	1.64	1	0.74	0.79	0.67	0.62	0.67
Yb	5	4.4	4.6	14.7	5.5	5	6.1	5.1	6.4	5.4	3.8	3.8	2.7	2.7	2.7	4.9	4.6	11.4	6.9	5	5.5	4.3	3.9	4.4
Lu	0.77	0.71	0.71	2.22	0.88	0.72	0.89	0.77	0.96	0.84	0.57	0.57	0.4	0.41	0.4	0.71	0.7	1.72	1.07	0.76	0.83	0.68	0.61	0.69
Hf	8.5	8.1	7.2	6.3	6.5	6.7	6.6	6.3	6.3	5.3	5.9	6.3	3.6	3.8	3.9	7.7	5.7	4.4	4.4	7.4	4.7	6	5.7	5.9
Ta	2	2.4	1.9	5.9	2.4	1.9	2	1.8	1.9	1.6	0.9	0.9	1.3	1.3	1.3	1.7	1.7	5.4	5.1	2.1	1.7	0.9	1.1	0.9
W	1	1	10	1	2	2	1	11	2	1	1	1	1	2	4	1	57	1	956	2	2	1	1	1
Tl	0.4	0.6	0.4	1	0.5	0.4	0.5	0.4	0.6	0.5	0.5	0.5	0.2	0.3	0.2	0.2	0.1	0.4	0.4	0.6	0.7	0.4	0.4	0.5
Pb	5	5	8	20	5	5	13	13	8	32	8	10	74	44	9	5	5	5	7	12	8	26	13	21
Bi	0.4	0.4	0.4	0.4	0.4	0.4	0.4	0.4	0.4	0.4	0.4	0.4	0.4	0.4	0.4	0.4	0.4	0.4	0.4	0.4	1.4	0.4	0.4	0.4
Th	15.4	15.6	13.7	31.9	15.4	13.8	14.3	13.6	14.6	13.5	11.7	12.3	3.1	3.1	3	12.2	13.6	19.8	21.8	14.7	14.1	9	6.8	6.8
U	2.3	2	3.3	14.8	2.3	2.8	10.4	10.6	2.2	3	8.4	6.3	0.8	0.8	0.8	1.5	2.8	5.8	9.3	4.2	4.9	4.5	2.5	2.7
K2O/Na2O	1.39093	2.05861	1.19571	20.7568	1.74476	0.86618	1.3079	1.32402	1.33795	1.5977	0.925602	1.30287	0.269504	0.730061	0.489726	0.208812	0.143307	1.61607	0.883886	1.83861	1.60119	1.12857	1.07761	1.01567
Na2O+K2O	8.44	8.35	8.19	8.05	7.85	7.67	8.47	8.32	8.44	6.78	8.8	8.82	3.58	5.64	4.35	6.31	7.26	8.79	7.95	8.97	8.74	7.45	6.96	6.43
Ta/Yb	0.4	0.545455	0.413043	0.401361	0.436364	0.38	0.327869	0.352941	0.296875	0.296296	0.236842	0.236842	0.481481	0.481481	0.481481	0.346939	0.369565	0.473684	0.73913	0.42	0.309091	0.209302	0.282051	0.204545
Th/Yb	3.08	3.54545	2.97826	2.17007	2.8	2.76	2.34426	2.66667	2.28125	2.5	3.07895	3.23684	1.14815	1.14815	1.11111	2.4898	2.95652	1.73684	3.15942	2.94	2.56364	2.09302	1.74359	1.54545
Th/Nb	0.641667	0.65	0.622727	0.590741	0.855556	0.766667	0.794444	0.906667	0.9125	0.9	1.4625	1.5375	0.172222	0.172222	0.166667	0.580952	0.8	1.1	1.45333	0.91875	1.28182	0.9	0.68	0.618182
La/Sm	5.05109	4.9	5.44118	1.64407	4.82667	5.70815	4.81301	4.90099	4.28125	4.38983	3.4898	4.1	3.89062	3.60606	3.72308	4.9359	5.87395	3.47297	4.63542	5.16949	4.96296	4.76842	4.53191	4.17822
La/Yb	13.84	6.68182	12.0652	1.31973	6.58182	26.6	9.70492	9.70588	6.42188	9.59259	4.5	4.31579	9.22222	8.81481	8.96296	7.85714	15.1957	4.50877	6.44928	12.2	7.30909	10.5349	10.9231	9.59091
Ba/Nb	25.125	33.5833	42.1818	26.963	33.3889	38.2778	46.5	55.6667	50.8125	110.133	201.75	192.875	16.6667	70.5556	31.2778	5.09524	5.82353	25.3333	41.2667	54	61.8182	77.2	79.1	64.0909
Y/Nb	2.375	1.45833	1.90909	1.75926	2.44444	2.83333	3.05556	3.6	2.9375	4.4	4.125	3.375	1.66667	1.72222	1.61111	1.90476	2.82353	5.61111	3.6	2.5625	4.09091	4.9	4.5	4.27273
