# Supplementary material for: Petrogenesis and geodynamic implications of Ediacaran rocks from the Sirwa massif (Central Anti-Atlas); insights from U-Pb geochronology, whole-rock geochemistry, and Sm-Nd isotopes
Source: Copernicus journal article supplement (doi:10.5194/egusphere-2025-6178), 2025-12-18
Supplement: Supplementary file 5 [file Supplementary table 5.xlsx]

## Sheet: U-Pb_DataTable
Sample	Uppm	Th/U	Data for Tera-Wasserburg plot						Data for Wetherill plot					Ages (Ma)
			238U/206Pb	1s%	207Pb/206Pb	1s%	208Pb/206Pb	1s%	207Pb/235U	1s%	206Pb/238U	1s%	Rho	207Pb/206Pb	2s (abs)	206Pb/238U	2s (abs)	207Pb/235U	2s (abs)	% concordance
Zg-106
Zg-106_5	832.609	0.367236	11.9813	1.72094	0.333644	2.53856	0.838823	2.66408	3.86585	2.48871	0.0851634	1.83584	0.191402	3615.86	76.4799	526.319	18.4427	1588.71	42.8105	14.5558
Zg-106_16	375.676	0.531167	5.85774	1.87289	0.471694	2.13129	1.23674	2.21213	11.5064	3.47155	0.174101	1.88322	0.88141	4162.45	56.3456	1033.27	35.8822	2533.51	69.7329	24.8236
Zg-106_14	503.24	0.392735	9.96039	1.31774	0.146685	6.11306	0.350948	6.4207	2.12762	6.82958	0.101155	1.33314	0.716975	1980.57	243.181	620.835	15.723	1076.38	97.4564	31.3463
Zg-106_23	230.814	0.634517	11.8371	1.4318	0.0985194	2.39589	0.25695	1.89333	1.15004	2.27745	0.0848868	1.58257	0.14077	1549.31	88.3997	524.875	15.9676	772.054	24.3206	33.8779
Zg-106_26	263.5	0.41497	10.5891	1.10882	0.087987	5.09773	0.230318	6.09007	1.19596	5.99988	0.0948223	1.07558	0.630524	1202.74	167.484	583.799	11.9873	767.077	57.9798	48.539
Zg-106_21	67.1167	0.347226	11.1651	1.30964	0.0795843	4.02154	0.173384	3.65569	0.972228	3.70875	0.089833	1.35413	0.064148	1027.68	173.37	554.265	14.3568	683.824	39.0622	53.9336
Zg-106_27	292.968	0.61694	10.7631	1.29928	0.0764147	2.56318	0.262629	1.92548	0.985247	2.3468	0.0931678	1.34825	0.113669	1061.93	101.001	573.947	14.7938	691.448	23.7592	54.0477
Zg-106_24	349.787	0.372956	10.0948	1.23055	0.0772839	2.62724	0.172809	2.66389	1.07247	2.81118	0.10012	1.24016	0.359822	1066.29	104.213	614.828	14.5293	732.68	28.8176	57.6603
Zg-106_33	187.69	0.472481	10.2417	1.3209	0.0733482	2.32184	0.217963	3.10125	1.00273	2.22707	0.0983498	1.25049	0.161938	1011.77	85.4441	604.449	14.4242	700.621	23.2527	59.7418
Zg-106_36	220.795	0.354918	10.4893	1.2015	0.0719391	2.84493	0.148883	3.59782	0.950256	3.09252	0.0959136	1.2574	0.498133	913.658	109.261	590.143	14.1916	670.671	29.209	64.5912
Zg-106_32	75.5344	0.354441	10.6017	1.61535	0.0678945	3.21025	0.156791	2.55594	0.887311	3.01646	0.0954823	1.52982	0.187405	837.977	126.218	590.775	18.2787	649.121	32.7966	70.5001
Zg-106_17	803.343	0.692141	11.3774	1.44932	0.0644638	1.5183	0.269339	1.53173	0.782552	1.62845	0.0888591	1.5564	0.585894	732.743	63.028	548.408	16.3438	587.769	15.4379	74.8431
Zg-106_18	88.5859	0.41672	10.4517	1.41213	0.0658159	2.91292	0.161905	7.68099	0.872073	2.63523	0.097063	1.43009	0.799279	704.253	136.468	596.804	16.2635	631.229	24.8092	84.7429
Zg-106_30	230.415	0.589185	10.2129	0.962538	0.0628228	1.92366	0.194267	1.97529	0.853003	1.81555	0.0981942	0.939242	0.226333	677.655	80.505	603.657	10.8065	627	18.1026	89.0803
Zg-106_40	196.579	0.352343	10.8989	1.3933	0.0612803	2.1669	0.12339	1.59608	0.782393	2.28777	0.0922658	1.30994	0.491261	626.738	88.8574	568.691	14.2526	587.845	21.7551	90.7383
Zg-106_3	361.005	0.371157	10.8304	1.3426	0.0615906	1.66626	0.131765	1.37742	0.784131	1.66612	0.0929578	1.29797	0.446885	630.543	71.2664	572.728	14.1915	585.942	14.6547	90.831
Zg-106_31	174.711	0.391925	10.953	1.28578	0.0606848	1.92058	0.131095	1.70467	0.771466	1.87367	0.0919331	1.24318	0.376392	604.139	79.9198	566.71	13.4708	581.235	17.5348	93.8046
Zg-106_12	221.138	0.361936	11.2866	0.992955	0.0603851	2.03066	0.123196	1.54488	0.735525	2.10593	0.0889643	1.07594	0.266767	571.703	90.8303	549.232	11.3109	556.961	17.9358	96.0696
Zg-106_15	253.982	0.382552	10.7048	1.10522	0.0607993	1.8035	0.146299	1.72764	0.787134	1.90416	0.0942425	1.12688	0.396115	596.609	79.7907	580.364	12.4902	587.033	16.9259	97.2771
Zg-106_35	251.573	0.292059	10.8968	1.21718	0.0603696	1.74543	0.105715	1.89577	0.775995	1.68217	0.0927526	1.23715	0.334727	584.45	75.0639	571.544	13.5143	581.25	14.9304	97.7918
Zg-106_25	212.097	0.297436	10.7809	1.30537	0.0605513	1.97672	0.105097	2.93121	0.782662	1.99751	0.093056	1.33916	-0.00665047	578.071	92.016	573.289	14.6784	584.223	17.8499	99.1727
Zg-106_7	70.9912	0.539384	10.9155	1.22936	0.0608608	2.82796	0.194398	1.92906	0.768269	2.86513	0.0926037	1.23534	0.160555	567.619	127.14	570.667	13.4837	573.226	25.162	100.537
Zg-106_38	321.176	0.33074	10.8957	1.15866	0.0595434	1.63	0.113662	2.26903	0.765999	1.70085	0.0926486	1.15032	0.413921	558.882	69.5884	570.965	12.567	575.514	14.924	102.162
Zg-106_20	245.193	0.311405	10.8532	1.21086	0.0595833	1.688	0.108047	1.51849	0.769014	1.94996	0.0927499	1.32392	0.545431	558.035	73.3311	571.496	14.4559	576.695	16.965	102.412
Zg-106_13	488.484	0.579923	10.9061	1.23511	0.0588122	1.30313	0.202692	1.34385	0.746844	1.61139	0.0922913	1.20375	0.614058	548.105	56.5974	568.927	13.116	565.334	13.9646	103.799
Zg-106_6	226.833	0.41489	10.9223	1.26863	0.0586636	2.1259	0.140087	1.57115	0.745776	2.09564	0.0920819	1.21515	0.202511	542.271	88.5771	567.599	13.1834	562.905	18.0858	104.671
Zg-106_4	782.221	0.318911	10.3109	1.52938	0.0600825	1.69441	0.121286	2.35058	0.801513	2.16852	0.0986602	1.58317	0.684341	577.518	69.826	606.092	18.2717	594.463	19.0074	104.948
Zg-106_29	247.174	0.40814	11.04	1.32114	0.0585976	1.90477	0.14922	1.77145	0.745447	1.95099	0.0908015	1.27394	0.317955	526.738	86.877	560.022	13.681	563.145	16.7576	106.319
Zg-106_2	192.975	0.467773	10.8147	1.1366	0.0588781	1.97431	0.154553	1.63197	0.749139	2.0102	0.0929034	1.10444	0.326907	535.328	84.688	572.487	12.0802	565.111	17.3886	106.941
Zg-106_9	172.681	0.307751	10.5035	1.15069	0.0587232	1.89305	0.106591	1.9251	0.768746	1.97337	0.0957611	1.1882	0.316039	548.441	75.5054	589.273	13.3895	576.433	17.2231	107.445
Zg-106_39	209.445	0.286023	10.7017	0.992225	0.0589209	1.8324	0.101228	1.69426	0.779302	1.98465	0.0940827	0.984908	0.271981	539.107	85.8723	579.476	10.9147	582.431	17.5103	107.488
Zg-106_37	219.506	0.378488	10.214	1.13456	0.0597299	1.74946	0.213753	39.5755	0.816574	1.53473	0.0987809	1.12398	0.166335	560.284	77.7172	607.03	13.0231	604.442	14.0273	108.343
Zg-106_8	135.176	0.376022	10.5722	1.29631	0.0586527	2.49151	0.133361	1.6572	0.767244	2.76108	0.0955602	1.32095	0.374949	539.624	105.615	588.081	14.8253	578.808	25.2799	108.98
Zg-106_1	228.521	0.609137	11.0197	1.42987	0.0587648	1.85223	0.220051	1.5471	0.729816	1.80927	0.0915634	1.34348	0.421425	517.671	87.3175	564.486	14.5257	554.329	15.594	109.043
Zg-106_10	146.24	0.412413	10.723	1.217	0.0585897	2.44527	0.136688	1.87776	0.750669	2.53054	0.093517	1.27566	0.32229	527.451	103.036	576.108	14.0786	565.566	22.0363	109.225
Zg-106_28	185.876	0.380727	10.8518	1.25465	0.0585159	2.08527	0.137113	5.23484	0.755324	2.25458	0.0928755	1.2524	0.391549	515.649	91.718	572.339	13.7129	568.937	19.6044	110.994
Zg-106_11	148.639	0.394799	10.4877	1.36201	0.0580467	2.17008	0.139025	1.68382	0.773951	2.31567	0.0960328	1.31605	0.337099	518.555	91.0961	590.819	14.8356	582.251	18.9562	113.936
Zg-106_22	392.278	0.276898	10.5091	1.34002	0.0572506	1.82839	0.0966463	1.34198	0.757267	1.797	0.0954776	1.39502	0.383437	479.424	77.5852	587.515	15.6321	570.263	15.7754	122.546
Zg-106_34	226.083	0.523972	11.1434	1.21694	0.0565637	1.69829	0.182954	1.33728	0.712621	1.839	0.0901977	1.135	0.427855	441.082	77.7459	556.505	12.1003	544.188	15.561	126.168
Zg-106_19	39.533	0.511888	10.4314	1.36557	0.0594337	5.40513	0.162744	3.53234	0.792314	5.40656	0.0965488	1.33859	0.0901528	458.951	256.887	593.977	15.1989	580.729	50.0895	129.421
Zg-119
Zg-119_137	303.914	1.14652	13.5799	2.34082	0.0774183	1.80398	0.173758	2.20981	0.796833	2.36853	0.0753397	2.28751	0.756984	1102.6	69.8363	467.659	20.6375	591.149	21.0001	42.4142
Zg-119_113	689.111	0.800834	27.3687	1.52753	0.0590419	1.65564	0.119649	1.72783	0.301815	1.64875	0.0369296	1.49702	0.426086	550.78	79.0296	233.709	6.86651	267.303	7.70207	42.4323
Zg-119_4	124.788	0.413641	10.6489	1.78366	0.0858703	2.34238	0.234966	2.23764	1.13529	2.701	0.0952598	1.66633	0.52162	1284.32	94.5901	586.09	18.6567	762.757	29.4263	45.6344
Zg-119_142	105.369	0.679071	15.1443	1.36605	0.0706305	3.05912	0.227793	3.27502	0.638456	3.42883	0.0662393	1.6174	0.470072	851.689	133.607	413.231	12.9503	495.102	26.8564	48.519
Zg-119_129	234.51	0.564622	11.0375	1.66468	0.0809907	2.78896	0.247776	2.23419	1.01704	2.58936	0.0918033	1.68384	0.212703	1165.49	119.929	565.744	18.1667	711.322	28.7706	48.5413
Zg-119_99	360.544	0.587334	14.822	3.15817	0.0693773	2.25566	0.184033	3.1474	0.681036	2.67909	0.072403	3.15218	0.664061	875.547	91.7533	449.585	27.344	523.247	21.6947	51.349
Zg-119_62	155.82	0.239816	10.2558	1.56679	0.0906684	5.65768	0.176719	7.25256	1.26454	6.36894	0.0986539	1.49908	0.488085	1170.37	215.995	606.101	17.3422	787.867	68.0065	51.7872
Zg-119_96	73.7609	0.337275	11.3543	1.33098	0.0740467	2.72675	0.12379	2.73972	0.90357	2.56115	0.0891805	1.34267	0.241382	971.578	113.202	550.416	14.1575	648.457	24.4427	56.6518
Zg-119_111	409.872	0.664699	16.868	1.54801	0.0618379	1.84183	0.124923	1.6671	0.514356	2.17699	0.0600433	1.7002	0.58582	647.128	76.5369	375.68	12.3889	419.434	15.0063	58.0535
Zg-119_108	86.0122	0.297368	10.4979	1.80154	0.0790431	4.2072	0.170269	4.63559	1.05794	4.48274	0.0959198	1.83748	0.175836	1002.92	177.818	589.864	20.6525	715.2	44.053	58.8149
Zg-119_128	248.678	0.355797	15.7823	3.60319	0.0647972	2.54404	0.104807	2.54236	0.599866	3.59007	0.0692305	3.83153	0.735344	723.545	103.643	430.136	31.8649	470.783	27.1174	59.4484
Zg-119_81	149.422	0.385844	10.8496	1.32363	0.0731325	2.42918	0.152449	2.3951	0.930876	2.59737	0.0932659	1.26592	0.363743	961.616	98.6571	574.556	13.9295	662.474	25.3485	59.749
Zg-119_75	291.292	0.343694	8.54452	1.35113	0.0811747	2.38135	0.133177	1.55629	1.33214	2.87967	0.118662	1.44781	0.650112	1172.51	96.5278	722.325	19.6888	855.469	35.2118	61.605
Zg-119_116	135.055	0.286855	16.6705	4.0013	0.0646289	3.34333	0.144687	2.79259	0.571369	3.38315	0.0662278	3.51616	0.663653	659.441	133.427	412.312	28.1741	453.443	25.2689	62.5245
Zg-119_58	558.232	0.305298	14.3891	2.09039	0.0634508	2.15851	0.130953	1.4991	0.617765	2.78146	0.0706814	2.14203	0.707556	691.002	93.3575	439.808	18.2384	484.241	22.367	63.6479
Zg-119_147	115.367	0.521108	12.5239	1.10038	0.0676009	2.7851	0.134486	3.91959	0.746759	2.84915	0.0805425	1.12917	0.167032	773.369	125.854	499.201	10.8321	560.993	25.0345	64.5488
Zg-119_39	157.362	0.868182	11.2145	1.41083	0.0687543	2.06627	0.200998	1.79771	0.853521	2.19099	0.0900026	1.40179	0.387895	847.399	88.4996	555.245	14.9411	622.973	20.2404	65.5235
Zg-119_95	188.681	0.615397	13.3953	2.3039	0.0641807	2.30022	0.129446	2.36209	0.674293	2.51421	0.0761164	2.36286	0.480119	705.168	115.02	472.259	21.5985	519.529	20.9692	66.9712
Zg-119_117	559.575	0.0619633	4.48706	1.82552	0.118139	1.35256	0.0218358	5.7966	3.7237	1.97324	0.227881	1.7251	0.753975	1923.39	45.4714	1321.03	41.3508	1567.35	32.7393	68.6825
Zg-119_7	246.254	0.450649	13.8286	1.08464	0.061619	2.03512	0.137718	1.66666	0.615279	2.0914	0.0723739	1.12221	0.30871	633.423	83.8786	450.311	9.75151	484.629	16.0158	71.0917
Zg-119_60	163.976	0.522362	11.3445	1.54948	0.0661332	2.77591	0.170034	3.08219	0.806429	2.5582	0.0889508	1.54146	0.146164	767.564	119.524	549.135	16.2254	597.953	23.0586	71.5426
Zg-119_154	426.724	0.563342	14.9756	1.31432	0.0600011	1.67952	0.127646	1.69149	0.562807	2.11359	0.0676343	1.35982	0.531348	588.04	67.8185	421.716	11.0807	451.297	15.1166	71.7155
Zg-119_107	395.156	0.693134	14.3601	3.21612	0.0621252	1.97676	0.13192	1.59776	0.630212	3.07057	0.0735306	2.86265	0.750761	633.456	92.6665	456.521	25.349	491.188	24.2399	72.0683
Zg-119_79	363.942	0.588592	12.417	2.25327	0.0639404	1.68205	0.186882	1.48873	0.724858	2.10332	0.0831772	2.06525	0.692212	710.185	72.1304	514.491	20.4571	550.739	18.028	72.4447
Zg-119_80	934.055	0.360769	14.8048	4.65165	0.061215	2.46185	0.165825	2.85294	0.596623	3.48088	0.0723911	3.88781	0.858692	605.398	104.255	449.503	33.8177	471.031	26.5511	74.2493
Zg-119_64	176.369	0.397186	11.3183	0.836194	0.0644089	1.8198	0.124892	1.48503	0.792791	1.86315	0.0884328	0.7838	0.312369	734.569	74.2397	546.169	8.19917	590.304	16.7563	74.3524
Zg-119_59	411.088	0.304391	13.0421	1.15024	0.0620121	1.65329	0.133515	1.56182	0.659732	1.76479	0.0773984	1.15567	0.405038	644.888	72.1933	480.418	10.6915	512.697	14.1286	74.4963
Zg-119_102	326.215	0.426281	11.4796	1.03609	0.0643996	1.82003	0.144605	1.53935	0.785215	1.97865	0.087115	1.03515	0.421655	721.213	76.717	538.297	10.6971	585.747	17.7592	74.6377
Zg-119_89	363.947	0.372694	10.432	1.37057	0.0663552	2.28704	0.151044	1.75383	0.883725	2.30747	0.0961694	1.39073	0.278302	782.843	92.4914	591.585	15.7155	638.766	22.2529	75.5688
Zg-119_15	165.825	0.510312	11.5089	1.10067	0.0639001	2.0498	0.149862	1.70384	0.769074	2.19875	0.0872256	1.03905	0.373154	709.742	88.1525	538.951	10.7408	575.973	19.4806	75.9362
Zg-119_93	206.618	0.38161	12.275	1.01614	0.0626627	1.85629	0.136954	1.74693	0.710115	2.02092	0.0820471	0.987624	0.3885	660.2	80.2627	508.202	9.65847	542.298	16.9395	76.977
Zg-119_131	388.808	0.533568	13.082	1.02132	0.0603568	1.67017	0.127942	1.54725	0.635716	1.45736	0.0763733	1.00514	0.112525	614.867	72.363	474.323	9.20063	500.662	12.1404	77.1423
Zg-119_77	106.652	0.73062	12.9177	1.47193	0.0614907	4.32258	0.144176	12.9353	0.657995	4.39987	0.0779353	1.47387	0.717744	621.221	189.373	483.674	13.7346	508.421	36.4433	77.8586
Zg-119_21	98.5741	0.33641	11.6762	1.08979	0.0640053	2.41975	0.106892	2.20366	0.757553	2.34571	0.08637	1.09466	0.197253	679.814	106.505	533.86	11.2091	568.906	20.572	78.5303
Zg-119_132	513.935	0.216235	11.824	1.65669	0.06225	1.50761	0.083392	1.75376	0.728849	2.05623	0.0858884	1.78123	0.659719	668.322	68.0111	530.723	18.097	553.247	17.241	79.4112
Zg-119_130	174.13	0.394904	10.8499	1.53573	0.0629008	1.79406	0.159769	1.9999	0.811154	2.08376	0.0924244	1.34672	0.479777	715.228	72.8014	569.563	14.6785	599.982	18.8777	79.6337
Zg-119_134	150.691	0.401919	11.4768	1.37342	0.0624534	2.47754	0.145936	2.44026	0.746313	2.27021	0.0879035	1.41163	0.1228	664.535	103.568	542.828	14.7037	566.247	20.4322	81.6855
Zg-119_76	252.953	0.805928	13.4722	1.35064	0.059622	1.71935	0.142849	1.59208	0.61314	1.90989	0.0751876	1.36657	0.498673	571.358	76.678	467.128	12.3026	483.693	14.5843	81.7575
Zg-119_157	198.69	0.429545	11.9932	1.3369	0.0626068	2.45133	0.114591	2.95505	0.725859	2.35833	0.0840162	1.40417	0.284465	631.759	107.818	519.783	14.0363	550.65	20.045	82.2755
Zg-119_90	166.822	0.306578	10.7959	1.4837	0.0640314	2.04802	0.123074	2.08728	0.824286	2.25207	0.0940837	1.48872	0.473082	697.883	89.9011	579.269	16.477	606.783	20.3553	83.0038
Zg-119_40	213.573	0.334488	11.3346	1.19038	0.0626953	1.92282	0.122466	1.73701	0.769495	2.06903	0.0887802	1.29381	0.428705	659.014	82.8522	548.065	13.5807	576.569	18.2145	83.1644
Zg-119_148	380.147	0.54036	11.4167	0.680361	0.0614231	1.51948	0.150433	1.0788	0.739943	1.44637	0.0876653	0.669847	0.141306	641.028	63.3207	541.648	6.94786	560.992	12.6042	84.4968
Zg-119_9	252.165	0.386138	11.0841	1.136	0.0628827	2.01565	0.145561	1.4885	0.779728	1.83802	0.0910496	1.14105	0.194007	661.074	87.6964	561.535	12.2607	582.999	16.3138	84.9427
Zg-119_1	310.312	0.394826	11.9786	2.21264	0.0617796	2.03666	0.147801	2.18989	0.719061	2.67474	0.0857587	2.23479	0.660757	621.705	89.7579	529.693	22.7242	545.749	22.1852	85.2
Zg-119_35	326.144	0.532458	11.7407	0.6034	0.0610097	1.39341	0.145729	0.909286	0.721222	1.38709	0.0851595	0.654452	0.238398	618.178	61.5528	526.786	6.62794	550.198	11.7325	85.216
Zg-119_121	204.249	0.437914	11.194	1.90053	0.0622739	2.18428	0.175855	2.67263	0.776013	2.38336	0.0908717	1.76413	0.547918	653.844	91.542	560.204	18.9302	583.253	22.9293	85.6784
Zg-119_13	230.06	0.310356	11.1916	1.35489	0.0621043	2.07046	0.123578	1.99689	0.776669	2.17857	0.0905257	1.36484	0.346977	647.792	92.9556	558.353	14.5798	580.326	19.2912	86.1932
Zg-119_135	102.768	1.10136	12.3418	1.05873	0.0611338	2.39757	0.125397	1.83883	0.674225	2.38244	0.0810478	1.08316	0.351245	579.021	110.597	502.223	10.4622	519.905	19.7491	86.7367
Zg-119_98	96.2848	0.313577	11.1869	1.37419	0.0620457	2.96076	0.122294	2.166	0.77085	2.67867	0.0902264	1.44306	0.0578514	635.49	120.867	556.555	15.3782	579.695	22.6921	87.5788
Zg-119_71	161.941	0.289437	11.1038	1.71145	0.0629101	2.52327	0.111366	2.68088	0.785314	2.37501	0.0917935	1.60409	0.968712	642.945	105.695	565.725	17.4008	584.651	21.1498	87.9896
Zg-119_19	464.781	1.33249	12.078	1.00985	0.0597537	1.59082	0.253576	1.73798	0.679435	1.38559	0.0830984	1.05176	0.227207	580.814	65.1665	514.443	10.4065	527.384	10.9071	88.5729
Zg-119_10	626.785	0.305613	11.4518	2.2044	0.0606549	1.97145	0.122228	1.80224	0.751453	2.26354	0.0903025	2.15595	0.562363	617.797	87.5824	556.598	22.9862	565.669	19.7253	90.094
Zg-119_92	233.697	0.415363	11.5543	1.28515	0.0607773	2.23693	0.139246	1.71569	0.729858	2.09338	0.086783	1.30065	0.20576	595.083	95.0648	536.24	13.3719	553.69	17.9788	90.1119
Zg-119_6	170.516	0.368589	11.0418	1.46559	0.0617479	1.85544	0.132696	1.58393	0.771443	1.69002	0.0919838	1.49882	0.312992	625.903	85.7475	566.895	16.2417	581.282	15.7425	90.5724
Zg-119_103	65.3002	0.473773	20.14	2.99953	0.0562441	4.16289	0.138181	2.60434	0.412502	5.07623	0.0525101	2.77353	0.55086	362.392	164.428	329.426	17.8418	342.186	29.305	90.9034
Zg-119_68	100.105	0.455309	11.2948	1.57628	0.0621484	2.61793	0.145936	2.28862	0.758246	2.5963	0.0895872	1.58605	0.313575	607.862	113.058	552.705	16.831	568.541	22.5188	90.9262
Zg-119_69	319.536	0.37921	11.4728	1.59685	0.060337	2.16714	0.122778	1.87938	0.727812	2.28092	0.0879146	1.63589	0.426103	591.967	93.8016	543.006	17.0116	553.714	19.5902	91.7292
Zg-119_8	85.6159	0.314234	11.239	1.30783	0.061587	2.74747	0.120004	1.82998	0.747541	2.24521	0.0900415	1.28721	0.0476344	602.336	113.027	555.524	13.7026	563.456	19.5805	92.2284
Zg-119_63	227.557	0.442459	10.3489	1.44462	0.0621436	1.84173	0.179575	2.27533	0.819511	1.88132	0.0969811	1.3947	0.183668	643.36	79.1077	596.345	15.9057	605.217	17.0708	92.6923
Zg-119_88	257.409	0.322368	10.5253	1.52839	0.0616419	2.03458	0.121765	1.90721	0.81029	1.91099	0.0953948	1.41102	0.287688	633.25	88.6832	587.02	15.7894	603.255	18.2611	92.6996
Zg-119_146	196.692	0.563575	11.2745	1.38182	0.0609532	2.06121	0.237354	2.81857	0.746859	2.17428	0.0894064	1.30616	0.243047	591.818	90.7007	551.763	13.81	563.337	18.659	93.2318
Zg-119_25	191.17	0.36351	11.0933	0.885066	0.0603913	1.81505	0.124998	1.87277	0.756869	1.93835	0.0903766	0.948836	0.285033	596.399	82.1943	557.623	10.1338	569.715	16.8299	93.4982
Zg-119_2	192.081	0.33348	10.5104	0.932911	0.060743	1.93496	0.125316	1.86905	0.807233	1.92136	0.0953736	1.00368	0.164616	621.439	83.8156	587.067	11.2702	598.318	17.2626	94.4689
Zg-119_123	478.213	0.406749	11.1066	1.28228	0.0601008	1.4797	0.145507	1.52135	0.756228	1.55075	0.091071	1.27795	0.427532	594.18	66.2114	561.612	13.7399	570.246	13.5692	94.5187
Zg-119_22	195.65	0.312495	10.7026	0.957715	0.0604587	2.07144	0.111652	1.89214	0.792853	2.00593	0.0940544	0.973691	0.0607499	609.428	92.1209	579.311	10.7782	589.978	17.9007	95.0582
Zg-119_106	299.623	0.323253	11.0068	1.50537	0.0610857	2.05848	0.133086	2.2588	0.78109	2.07177	0.0917716	1.449	0.342507	594.315	94.001	565.668	15.6728	583.136	18.4329	95.1798
Zg-119_11	487.402	0.327565	11.485	1.02425	0.0594954	1.41676	0.104932	1.48578	0.719647	1.39225	0.0875641	0.98813	0.392189	566.986	63.6141	541.001	10.2673	549.485	11.9099	95.417
Zg-119_114	367.465	0.373841	10.8855	1.66378	0.0603381	1.77485	0.138092	1.96174	0.768892	1.97995	0.0924864	1.67404	0.607085	595.977	74.7963	569.773	18.2466	576.512	17.4076	95.6032
Zg-119_32	255.48	0.363947	11.0385	1.11341	0.0607094	2.12082	0.120828	1.68275	0.758565	2.04133	0.0906386	1.04855	0.281821	579.962	94.0733	559.14	11.2062	573.617	18.7125	96.4098
Zg-119_54	164.927	0.314777	11.0021	1.22496	0.0604757	2.3264	0.118517	1.81935	0.764329	2.32622	0.0910297	1.17013	0.299853	580.112	98.8912	561.407	12.5448	572.806	20.6306	96.7758
Zg-119_43	419.558	0.325236	10.8701	1.11149	0.0601679	1.37646	0.115057	1.26229	0.767033	1.32431	0.09244	1.23168	0.418887	588.292	61.0511	569.704	13.4203	576.856	11.7682	96.8402
Zg-119_66	118.649	0.325863	10.5272	1.40894	0.061287	2.40797	0.12857	2.65595	0.803561	2.52808	0.0953734	1.37556	0.368968	606.834	103.299	589.832	16.4173	594.247	22.9568	97.1983
Zg-119_17	136.277	0.312681	10.8143	1.48772	0.0611232	2.59629	0.132345	12.2402	0.772647	2.16893	0.0935364	1.57695	0.166231	591.952	111.717	576.002	17.3624	578.008	19.4407	97.3056
Zg-119_34	106.189	0.327487	10.7931	1.37253	0.0613209	2.97709	0.114214	2.18668	0.787359	2.93192	0.0928251	1.32579	0.242474	586.714	123.4	571.938	14.5111	583.843	25.9372	97.4815
Zg-119_38	183.908	0.532282	10.8688	0.97691	0.0604346	1.80011	0.188742	1.47456	0.777318	2.11716	0.0922676	0.930478	0.513562	582.337	81.8888	568.793	10.1249	580.878	18.7387	97.6742
Zg-119_26	198.817	0.352413	11.0228	1.66614	0.060678	2.21079	0.129734	1.8835	0.768037	2.29224	0.0917683	1.56959	0.401875	575.893	97.3366	565.595	16.9681	575.16	20.0258	98.2119
Zg-119_105	348.71	0.370012	11.2599	1.1146	0.059343	1.86837	0.141854	2.21159	0.744266	1.98752	0.0895605	1.06651	0.379145	558.169	78.1124	552.761	11.3126	562.318	17.1394	99.0312
Zg-119_33	188.266	0.352179	11.0976	1.03262	0.0598566	2.30184	0.131518	1.49283	0.750666	2.0856	0.0907919	1.03438	0.0690023	563.73	97.581	560.049	11.088	565.686	18.3767	99.3471
Zg-119_144	606.79	0.399175	11.0076	0.801647	0.0590946	1.19051	0.121927	1.37604	0.736752	1.15853	0.0912672	0.816152	0.432231	563.407	54.8648	562.921	8.78725	559.642	9.9497	99.9137
Zg-119_57	182.444	0.361538	10.8571	1.41989	0.0599581	1.94545	0.133328	1.9234	0.770905	2.1383	0.0930277	1.49905	0.425176	572.826	89.8009	573.047	16.4267	577.16	18.9073	100.039
Zg-119_14	211.929	0.563477	11.2242	1.63585	0.0591271	2.13753	0.121338	2.62525	0.729268	1.98466	0.0895662	1.48961	0.332252	552.007	103.393	552.73	15.7914	558.325	18.565	100.131
Zg-119_49	112.121	0.2873	11.1528	1.46779	0.0604168	2.73019	0.110422	2.38904	0.746666	2.56956	0.0898639	1.25367	0.196522	552.502	126.131	554.488	13.3328	561.92	22.404	100.359
Zg-119_120	281.3	0.368982	11.2109	1.11529	0.0593589	1.55344	0.132944	1.43297	0.737393	1.70268	0.0900153	1.15478	0.452992	553.219	69.0936	555.42	12.2654	559.011	14.6177	100.398
Zg-119_124	124.645	0.341782	11.1663	1.40002	0.0610359	2.7933	0.12755	2.26303	0.758267	2.70937	0.0907313	1.34072	0.185918	555.634	126.467	559.58	14.3824	568.196	23.6083	100.71
Zg-119_155	420.202	0.27647	10.6872	1.46149	0.0600301	1.56631	0.108078	1.44189	0.782109	1.75071	0.0943839	1.34351	0.516147	577.007	70.975	581.109	14.9449	584.607	15.5041	100.711
Zg-119_140	263.051	0.368113	11.0895	1.29486	0.0588886	2.06004	0.138664	1.61087	0.727526	1.95285	0.0902615	1.25878	0.307481	551.732	84.4489	556.835	13.4399	555.701	17.454	100.925
Zg-119_31	179.782	0.524403	12.0973	1.13981	0.0585085	1.87304	0.12723	1.71983	0.672726	1.92805	0.0830901	1.12827	0.348509	508.823	85.3804	514.37	11.1354	520.199	15.7616	101.09
Zg-119_160	227.117	0.312649	10.9673	1.35828	0.0607316	2.64025	0.118864	1.90718	0.763823	2.56441	0.0919901	1.41386	0.195907	558.487	113.787	566.976	15.3495	572.066	21.6769	101.52
Zg-119_23	432.863	0.348404	11.1293	1.18475	0.0593199	1.81518	0.123493	1.5803	0.733039	1.52155	0.0898772	1.21202	0.215358	544.383	77.148	554.583	12.8589	556.826	13.1848	101.874
Zg-119_112	195.978	0.346852	11.3287	1.32648	0.059292	2.20563	0.138963	3.17744	0.720814	2.04934	0.0893892	1.34062	0.299105	540.36	96.5123	551.648	14.1617	552.202	16.1776	102.089
Zg-119_18	138.063	0.395219	10.6691	1.68163	0.0601527	2.47415	0.139388	1.8934	0.781779	2.55922	0.0943143	1.51646	0.522848	567.939	100.838	580.613	16.8185	581.889	23.0804	102.232
Zg-119_70	233.656	0.365407	10.6955	1.23584	0.059439	1.70953	0.126969	2.11826	0.783486	1.51148	0.0945268	1.2558	0.342168	565.082	79.8656	581.985	13.9529	585.895	13.4023	102.991
Zg-119_87	326.649	0.337071	10.9216	1.46374	0.0600541	2.18031	0.125024	1.85875	0.762157	2.2876	0.0929597	1.46859	0.473283	555.362	94.1455	572.661	16.0734	575.5	21.0124	103.115
Zg-119_67	218.92	0.308465	10.8828	1.75321	0.0594225	1.89304	0.116483	2.24644	0.761779	2.14942	0.0933582	1.76887	0.493049	556.851	87.2518	574.846	19.4503	571.962	18.7029	103.232
Zg-119_85	171.725	0.136758	2.53781	1.44036	0.129986	1.37875	0.0544795	2.7574	7.09142	1.28338	0.398014	1.48163	0.483882	2083.22	47.4293	2155.81	54.4214	2118.31	23.2237	103.484
Zg-119_145	126.324	0.269812	10.8585	1.14006	0.0603581	2.41237	0.0972617	2.28526	0.768132	2.55612	0.0929705	1.1764	0.312175	551.604	109.584	572.853	12.8688	574.298	22.3731	103.852
Zg-119_119	284.278	0.411862	11.7622	1.4392	0.0585831	1.92692	0.143697	1.6971	0.691454	2.11414	0.0862331	1.3954	0.506492	511.159	84.8405	532.94	14.2806	530.996	17.486	104.261
Zg-119_86	142.857	0.422169	11.0968	1.26573	0.0602182	2.68861	0.156824	2.13695	0.746055	2.73502	0.090832	1.36198	0.365098	536.934	115.316	560.162	14.5964	565.215	24.344	104.326
Zg-119_127	163.257	0.325624	10.8648	1.57637	0.0604176	2.44598	0.129497	2.8071	0.76743	2.48514	0.0932716	1.69572	0.315238	548.987	115.163	574.38	18.5975	574.137	21.7493	104.625
Zg-119_101	184.702	0.360737	11.0734	1.45275	0.0590885	2.13673	0.138962	2.02681	0.759836	2.30549	0.0910598	1.32572	0.351817	536.629	103.391	561.522	14.2664	570.286	20.4668	104.639
Zg-119_52	114.294	0.29747	11.0115	1.2897	0.0594876	2.76959	0.109131	2.24859	0.74881	2.55584	0.0917753	1.29921	0.0999762	539.643	108.836	565.786	14.0634	563.789	21.8637	104.844
Zg-119_30	76.2164	0.536418	10.7157	1.29288	0.0608205	2.76634	0.195133	2.2177	0.777129	2.7167	0.0935077	1.30699	0.335132	546.506	126.74	575.963	14.4015	578.753	24.1526	105.39
Zg-119_158	168.905	0.31773	11.0964	1.61465	0.0600668	2.65879	0.12869	1.93347	0.757677	2.81166	0.0912185	1.54184	0.394571	532.951	115.514	562.365	16.5978	567.512	24.4068	105.519
Zg-119_115	70.1732	0.280727	11.2133	1.4755	0.0605302	3.4359	0.107106	2.75594	0.748836	3.00447	0.0905859	1.52537	-0.0331978	529.104	149.256	558.641	16.284	561.547	26.5623	105.582
Zg-119_136	231.318	0.393126	10.9131	1.29576	0.059233	1.93062	0.138274	3.73655	0.739679	2.1874	0.0923393	1.36786	0.363771	536.44	83.4279	569.056	14.8933	559.197	18.6596	106.08
Zg-119_104	416.983	0.352048	10.5436	1.20516	0.0591135	1.31292	0.123519	1.856	0.784643	1.63314	0.0958664	1.25725	0.621165	551.515	58.7112	589.863	14.1383	586.319	14.3029	106.953
Zg-119_97	157.181	0.285256	11.1111	1.88915	0.0595176	2.32818	0.1133	2.3223	0.758119	2.35146	0.0922777	1.88103	0.480133	531.282	97.3464	568.417	20.4392	569.215	20.6163	106.99
Zg-119_73	322.912	0.432939	11.436	1.0517	0.0585024	1.97172	0.185741	1.5329	0.703439	1.91789	0.0878254	1.1235	0.12729	505.122	88.8933	542.475	11.6837	538.598	16.0081	107.395
Zg-119_37	124.447	0.36208	10.9863	1.25419	0.0585914	2.00057	0.135789	1.94546	0.740318	1.96973	0.0916942	1.29669	0.283497	523.716	85.5428	565.278	14.0394	560.074	16.9568	107.936
Zg-119_45	251.788	0.587413	10.6113	0.933521	0.0592549	1.83474	0.204186	1.40162	0.776802	1.83931	0.0948102	0.913942	0.246336	538.778	82.4187	583.779	10.2071	581.318	16.3811	108.352
Zg-119_41	240.02	0.436946	10.907	1.18283	0.0589812	1.82185	0.159463	1.52423	0.752285	1.73438	0.0926593	1.26589	0.36035	526.659	86.9182	570.983	13.7821	570.687	16.5378	108.416
Zg-119_126	229.494	0.295866	10.983	1.33283	0.0586851	1.75058	0.107084	1.91362	0.737698	1.98373	0.0917015	1.2772	0.541628	519.839	80.6873	565.329	13.8109	561.701	18.1421	108.751
Zg-119_12	56.7532	0.391084	11.2223	1.49446	0.0615467	3.57708	0.154698	3.68005	0.74502	3.35969	0.0900621	1.5644	0.165468	510.786	171.02	555.522	16.6679	562.834	30.2603	108.758
Zg-119_24	76.6874	0.336448	11.2521	1.29765	0.059006	2.57563	0.119773	2.17191	0.735497	2.73225	0.0899183	1.2783	0.253014	509.14	121.085	554.8	13.5856	554.965	23.4493	108.968
Zg-119_159	139.593	0.327168	11.5812	1.50036	0.0585016	2.21071	0.255523	58.2619	0.705648	2.14703	0.0876994	1.46885	-0.19762	496.82	96.6212	541.596	15.2575	539.364	17.8228	109.013
Zg-119_50	263.737	0.377507	10.9562	1.25568	0.0587644	1.90105	0.138213	1.77176	0.742941	1.83373	0.0919535	1.35703	0.304254	517.967	85.4392	566.782	14.7077	561.911	15.9151	109.424
Zg-119_48	207.457	0.332629	10.6059	1.36925	0.0590332	2.06762	0.125863	1.69897	0.786728	2.06941	0.0955499	1.39097	0.306187	536.264	94.7819	587.945	15.6145	586.422	18.2365	109.637
Zg-119_118	80.7811	0.269007	10.9398	1.24807	0.0608804	3.20551	0.0980145	2.61783	0.781598	3.1657	0.0924637	1.30814	0.199177	515.338	153.629	569.812	14.217	579.432	28.2623	110.571
Zg-119_20	268.787	0.36868	10.793	1.30567	0.0587246	1.93045	0.130527	1.62955	0.745619	1.63983	0.0937536	1.27928	0.255338	516.597	84.3742	577.423	14.1342	563.921	14.1652	111.774
Zg-119_51	71.6241	0.33277	10.8072	1.35695	0.0593134	2.76353	0.11899	2.67798	0.758583	2.76948	0.0932604	1.39136	0.208367	513.159	128.169	574.468	15.3185	568.243	23.5894	111.947
Zg-119_55	123.996	0.309307	10.8514	1.13666	0.0587361	2.37313	0.103481	1.8419	0.750124	2.31728	0.0924197	1.0544	0.204042	507.91	103.916	569.683	11.5037	565.426	20.0025	112.162
Zg-119_122	192.07	0.353778	10.8823	1.08492	0.0584579	1.89403	0.132043	1.87042	0.746995	2.00786	0.0923021	1.06113	0.382818	506.58	85.6469	568.955	11.5365	563.822	17.4438	112.313
Zg-119_47	208.626	0.397905	11.2986	1.70817	0.0579441	1.86809	0.145438	2.22194	0.724131	2.37822	0.0890735	1.54459	0.623727	488.425	84.0014	549.691	16.2616	549.531	20.1879	112.544
Zg-119_109	458.221	0.295963	10.768	1.55843	0.057848	1.95714	0.111609	1.7338	0.760406	1.8827	0.0945922	1.67746	0.272999	516.823	85.7734	582.162	18.5859	571.884	16.4007	112.642
Zg-119_74	174.001	0.272985	11.2831	1.50825	0.0584918	2.20532	0.111865	2.21909	0.714787	1.91653	0.0899881	1.43509	0.992271	492.183	102.837	555.146	15.2771	545.291	16.198	112.792
Zg-119_149	97.2174	0.309001	10.5808	1.41931	0.0593678	2.87032	0.117483	2.20098	0.764147	2.58717	0.0944871	1.56589	0.107724	515.559	125.343	581.603	17.405	571.803	23.043	112.81
Zg-119_29	217.315	0.378166	10.729	1.30747	0.059024	2.3604	0.13336	1.68278	0.761479	2.08795	0.0938255	1.19343	0.0815308	506.402	105.942	577.882	13.208	571.944	18.2518	114.115
Zg-119_152	273.015	0.440894	11.0503	1.52451	0.0582006	2.61348	0.127229	2.44923	0.71647	2.21015	0.0907701	1.47155	0.137025	489.032	108.053	559.752	15.7971	545.562	18.7217	114.461
Zg-119_156	94.5022	0.28599	10.9196	1.45985	0.060156	3.11777	0.11632	2.01264	0.750768	3.02589	0.0928836	1.37862	0.263527	497.719	146.588	572.254	15.1144	567.388	28.1769	114.975
Zg-119_143	102.087	0.241805	10.9703	1.40977	0.0590017	2.56763	0.0900451	2.42037	0.742852	2.55591	0.0923837	1.3652	0.256468	495.12	116.251	569.319	14.8828	559.854	22.1266	114.986
Zg-119_27	73.0219	0.438078	11.0396	1.48076	0.0593561	3.64103	0.179799	4.14518	0.747087	3.66919	0.0903961	1.60691	0.214467	482.945	169.039	557.472	17.2069	557.646	31.9608	115.432
Zg-119_5	494.697	0.344124	10.8907	1.6412	0.0576638	1.73756	0.123556	1.78398	0.739431	1.96284	0.0930557	1.65591	0.556925	495.734	80.7449	573.132	18.089	559.607	16.7382	115.613
Zg-119_100	307.093	0.562537	11.3913	1.15045	0.057534	1.92656	0.189303	1.5192	0.708987	1.99442	0.0885908	1.13577	0.32504	472.239	84.6275	547.005	11.9133	541.738	16.6783	115.832
Zg-119_61	221.063	0.359513	10.83	1.1287	0.0579748	1.91025	0.133097	1.50008	0.737504	2.10902	0.091898	1.04043	0.550702	487.734	86.4784	566.577	11.284	558.086	18.0744	116.165
Zg-119_153	209.712	0.48492	10.1289	1.59908	0.0594522	2.26404	0.191451	1.89205	0.808561	2.23947	0.098959	1.62426	0.412381	525.884	103.536	611.855	17.2053	598.08	20.1443	116.348
Zg-119_36	250.507	0.388253	10.7454	1.28159	0.0571874	1.68236	0.134008	1.57313	0.745613	1.95421	0.0932942	1.29724	0.442318	493.082	76.824	574.714	14.2607	563.243	16.7322	116.555
Zg-119_28	151.045	0.506762	11.0841	1.64671	0.0582339	2.20096	0.189469	1.85845	0.731457	2.08395	0.0919374	1.63054	0.325416	484.548	98.8857	566.555	17.6641	554.617	17.876	116.924
Zg-119_83	227.018	0.352982	11.1932	1.18788	0.057345	1.91261	0.131044	1.84273	0.710434	1.96172	0.0902401	1.20824	0.283268	476.074	89.9765	556.732	12.8741	542.628	16.6369	116.942
Zg-119_151	80.6046	0.314941	10.8776	1.53551	0.058721	2.91139	0.126339	2.73501	0.74844	3.07008	0.0918057	1.43412	0.333772	478.99	138.655	565.875	15.5422	565.741	27.9217	118.139
Zg-119_3	144.384	0.41916	10.6589	1.9783	0.0577579	2.27362	0.15542	2.07398	0.764525	2.2171	0.0963611	1.92272	0.345243	500.832	100.858	592.396	21.754	573.259	19.6586	118.283
Zg-119_82	120.634	0.399605	11.2991	1.45279	0.0590606	3.05224	0.1683	1.96889	0.725855	2.98478	0.0892628	1.36375	0.204223	465.697	139.517	550.89	14.3952	548.516	25.2637	118.294
Zg-119_94	154.576	0.540801	10.3589	1.59775	0.0591211	2.45657	0.203451	2.06261	0.802549	2.55633	0.0975052	1.48895	0.412519	504.664	111.001	599.372	17.0264	593.624	23.0287	118.767
Zg-119_150	122.673	0.329332	10.6765	1.45788	0.058707	2.548	0.122819	2.06978	0.75423	2.23474	0.0945128	1.39823	0.263899	482.973	117.095	581.838	15.537	567.447	19.0896	120.47
Zg-119_110	95.8263	0.302393	11.0668	1.30761	0.0584812	2.7546	0.114772	2.48286	0.728992	2.46204	0.0906388	1.32668	0.224048	463.681	124.704	559.036	14.1976	555.973	22.3991	120.565
Zg-119_78	189.467	0.321107	11.0402	1.34522	0.0581323	2.55449	0.135162	2.1171	0.71929	2.25726	0.0917088	1.302	0.151483	463.238	114.401	565.361	14.1064	547.069	19.0301	122.045
Zg-119_16	247.155	0.392186	10.9178	0.923282	0.0571804	1.72155	0.140297	1.52077	0.721958	1.56495	0.0921643	0.935713	0.117122	465.031	76.3146	568.18	10.1693	550.25	13.3172	122.181
Zg-119_139	180.223	0.334246	10.6975	1.23402	0.0582653	2.33042	0.122949	1.62468	0.750664	2.52716	0.0944936	1.25774	0.448786	476.143	110.419	581.793	13.9673	568.281	22.9523	122.189
Zg-119_72	214.367	0.343223	10.8773	1.39309	0.0576985	2.15551	0.139001	1.90124	0.732673	2.27997	0.0932411	1.43432	0.429276	467.901	95.2463	574.336	15.7293	554.863	19.1819	122.747
Zg-119_56	155.961	0.329052	11.0839	1.29887	0.0572739	2.08013	0.120088	1.85702	0.718498	2.14922	0.0912794	1.27044	0.342404	451.861	96.6329	562.841	13.6962	546.88	18.2123	124.561
Zg-119_133	363.839	0.193318	10.4354	1.8225	0.0584467	2.35361	0.0734827	1.92022	0.778882	2.59375	0.0975589	1.83334	0.413405	482.852	109.063	603.443	22.2405	580.464	22.0767	124.975
Zg-119_42	153.901	0.299043	10.9772	0.980283	0.0574458	2.70097	0.102986	2.0505	0.728319	2.72378	0.0915331	0.974486	0.189159	451.153	122.397	564.49	10.5316	552.253	23.164	125.122
Zg-119_91	243.329	0.39841	11.2583	1.3932	0.0565291	2.01184	0.140227	1.74146	0.6968	2.16766	0.0899838	1.31848	0.453205	441.757	97.241	555.17	14.0463	537.663	19.103	125.673
Zg-119_125	64.6993	0.254504	11.029	1.50557	0.0575039	2.87789	0.093973	2.95455	0.720851	2.71216	0.0903645	1.37831	0.164771	442.688	129.721	557.394	14.711	550.626	23.867	125.911
Zg-119_138	202.211	0.375477	10.6718	1.32641	0.0569209	2.13281	0.14009	1.55876	0.732275	2.212	0.0944635	1.37428	0.389145	454.995	94.291	581.559	15.2896	554.777	18.8132	127.817
Zg-119_46	334.334	0.271856	10.6751	1.25357	0.056562	1.93326	0.0969138	1.79283	0.740061	1.91929	0.0937533	1.24052	0.406691	435.705	81.4271	577.438	13.7182	560.092	16.3089	132.529
Zg-119_84	203.772	0.326764	10.8508	1.0943	0.0565867	2.24938	0.153808	16.6399	0.717813	2.26317	0.0922392	1.19227	0.0150983	418.567	103.179	568.534	12.9951	546.146	19.2436	135.829
Zg-119_53	51.4058	0.361304	10.5638	1.67081	0.0577013	3.86352	0.14387	2.90347	0.748994	3.89302	0.0960141	1.71669	0.245129	427.874	168.371	590.491	19.3719	563.163	36.4975	138.006
Zg-119_141	155.01	0.25719	10.5125	1.3036	0.056041	2.19439	0.0905691	2.02367	0.733938	2.37451	0.0941255	1.30104	0.387663	412.96	105.094	579.602	14.4736	555.256	20.2774	140.353
Zg-119_44	86.7882	0.317854	10.6805	1.33052	0.0573629	3.22807	0.113834	2.34138	0.746186	3.06052	0.0947375	1.2539	0.082956	409.767	147.256	583.225	14.0059	559.868	26.5092	142.331
Zg-119_65	39.3869	0.313222	11.1754	2.03668	0.0582178	3.91999	0.132483	3.45689	0.750178	4.50789	0.0921557	2.05459	0.41	385.563	190.239	567.589	22.2818	555.246	38.4595	147.211
Zg-132
Zg-132_24	724.194	0.593749	3.53926	1.00247	0.304076	2.44268	0.655205	2.72704	11.934	2.72045	0.283444	1.04227	0.417878	3451.86	79.9569	1612.87	27.9781	2576.15	52.2763	46.7246
Zg-132_31	1166.38	0.393051	3.02299	1.03166	0.330567	2.35533	0.656116	3.24064	15.1429	2.13246	0.333308	1.03192	0.0299141	3596.24	74.7675	1852.87	33.221	2824.97	38.6428	51.5225
Zg-132_22	497.299	0.230468	3.22268	0.93461	0.255853	1.24397	0.428991	1.76473	11.005	1.06584	0.312259	0.950103	0.276055	3211.23	38.2783	1750.65	29.0459	2520.11	19.8719	54.5166
Zg-132_23	1077.87	0.265431	3.62676	2.56326	0.223605	2.75517	0.343642	4.87617	8.54181	1.33765	0.291348	2.91503	-0.0738351	2961.97	98.761	1638.35	83.1421	2285.09	24.2776	55.3129
Zg-132_6	195.283	0.391207	1.92601	0.95209	0.514267	0.883134	1.17886	0.967684	37.3408	1.52438	0.522553	0.951787	0.597298	4277.6	26.0253	2707.56	42.0454	3695.02	29.1904	63.2963
Zg-132_11	547.7	0.0952412	2.13623	1.21749	0.379518	1.28062	0.736738	1.78211	24.8773	1.71423	0.473178	1.26315	0.666233	3819.89	38.0231	2493.81	51.8917	3293.79	33.4649	65.2849
Zg-132_43	235.366	0.239667	2.66795	1.30099	0.213127	2.04772	0.311534	3.65098	11.143	2.67756	0.37666	1.36193	0.7013	2904.88	71.599	2058.15	48.1153	2516.51	53.1911	70.8516
Zg-132_10	664.94	0.0740816	2.92826	0.924071	0.177131	1.10879	0.163445	2.2762	8.41849	1.18518	0.343516	0.89913	0.43871	2616.86	37.507	1902.35	29.7025	2273.16	21.4014	72.6958
Zg-132_14	635.43	0.0672865	2.57209	0.962543	0.214803	1.95643	0.256417	5.02281	11.6477	2.15135	0.389868	0.886353	0.429129	2916.87	62.3867	2120.79	32.162	2562.04	40.9448	72.708
Zg-132_2	734.888	0.291065	2.74757	1.69078	0.196164	1.50945	0.253053	3.03911	9.95393	1.83887	0.370199	1.7137	0.507381	2781.36	48.964	2026.29	59.3348	2422.06	34.2777	72.8526
Zg-132_20	601.837	0.657382	2.72715	0.97351	0.195134	1.66187	0.389142	2.407	9.93417	1.94041	0.369311	1.02264	0.526161	2766.48	54.5738	2024.42	35.2364	2425.29	35.9931	73.1766
Zg-132_17	548.828	0.406152	2.70739	0.945696	0.197301	2.4802	0.307129	3.87113	10.1646	2.69411	0.371743	0.960981	0.455187	2762.55	80.8775	2036.05	33.435	2428.14	49.9611	73.702
Zg-132_54	594.598	0.116086	2.52598	1.13928	0.215363	1.58738	0.295648	2.88272	11.8507	1.60551	0.399568	1.14829	0.337291	2928.73	52.3938	2164.6	42.1141	2584.45	31.0735	73.9092
Zg-132_53	554.869	0.16934	2.59648	0.918985	0.204867	2.73288	0.271785	5.21528	10.8156	2.81724	0.386211	0.945363	0.382386	2820.94	81.1376	2103.64	34.0583	2495.15	50.4836	74.5723
Zg-132_51	524.154	0.0876411	2.43413	0.858522	0.218341	2.83898	0.281603	6.01216	12.5072	3.19513	0.411709	0.894706	0.560522	2908.43	101.199	2221.16	33.7447	2608.45	64.9591	76.3698
Zg-132_28	739.339	0.242446	3.18386	1.39535	0.147695	1.19339	0.11248	2.71782	6.51137	2.00141	0.316193	1.37072	0.698243	2313.68	40.3942	1769.89	42.5034	2042.03	35.5683	76.4964
Zg-132_35	261.435	0.194855	2.37017	1.07698	0.215829	3.23122	0.314493	6.20163	12.7312	3.87391	0.425309	1.06518	0.532148	2885.92	100.223	2282.26	40.9859	2620.2	65.9498	79.0826
Zg-132_18	480.552	0.356368	2.57233	1.79489	0.176049	2.3743	0.228119	4.18627	9.32458	2.01344	0.391361	1.77422	0.422728	2603.75	79.5863	2127.45	64.3812	2381.82	46.2337	81.707
Zg-132_13	419.569	0.257191	2.78046	1.96393	0.155698	1.48443	0.159492	3.94442	7.72861	1.49009	0.360244	1.77471	0.704783	2401.41	50.7637	1980.99	60.4679	2197.05	26.6183	82.4929
Zg-132_39	480.047	0.0708405	2.67426	1.49362	0.149205	0.967003	0.0853195	1.71912	7.7449	1.57403	0.378441	1.6282	0.815491	2335.77	30.5578	2064.48	57.1718	2199.48	30.0085	88.385
Zg-132_29	1216.84	0.0374507	2.87644	1.36287	0.136589	0.979034	0.0351071	3.48976	6.64316	1.48128	0.352025	1.29893	0.750018	2183.44	31.6497	1941.63	43.7203	2059.08	26.3074	88.9252
Zg-132_32	747.466	0.053032	2.83169	1.91585	0.136446	0.866355	0.0480258	4.45591	6.7482	1.69101	0.357882	1.8876	0.882836	2178.85	30.7091	1969.18	64.0501	2074.91	29.7877	90.3771
Zg-132_33	200.875	0.538184	2.62693	0.844367	0.145096	1.42412	0.190799	2.37084	7.67911	1.64941	0.382487	0.867322	0.476869	2274.8	48.8515	2086.69	30.7889	2187.21	29.4032	91.7307
Zg-132_34	512.43	0.0294532	2.69153	0.720892	0.136978	0.846387	0.0417603	3.83647	7.13068	0.953723	0.372996	0.746077	0.459924	2183.11	29.6364	2042.52	25.9846	2125.31	16.9022	93.5603
Zg-132_36	251.278	0.30385	2.76171	0.982165	0.129667	0.96836	0.0963238	1.27782	6.51327	0.896671	0.36262	1.06035	0.41923	2094.47	36.7812	1993.23	36.3215	2046.08	15.6718	95.1661
Zg-132_50	437.921	0.253458	2.49196	1.32564	0.145168	1.7089	0.11461	3.76108	8.08177	1.70026	0.404645	1.3085	0.381436	2274.07	61.0628	2188.19	48.6269	2234.47	31.4072	96.2238
Zg-132_12	655.866	0.144718	2.60063	0.724524	0.136987	0.928393	0.070991	3.54648	7.32345	1.09777	0.385991	0.742413	0.539683	2182.33	32.3628	2103.24	26.5329	2148.32	19.592	96.3758
Zg-132_61	539.282	0.0774596	2.63349	1.4064	0.133767	1.3183	0.0390288	2.09209	7.04393	1.65073	0.382091	1.47485	0.6262	2141.77	46.1496	2084.45	52.1365	2113.94	28.4722	97.3239
Zg-132_5	385.543	0.354939	2.53876	0.797148	0.136259	0.903507	0.126788	2.13886	7.49476	1.05893	0.394637	0.82635	0.511825	2178.77	33.1222	2143.04	30.1833	2172.95	17.941	98.3602
Zg-132_56	256.278	0.156889	2.69673	0.850812	0.128283	1.02869	0.0538778	2.11265	6.60853	0.805253	0.37278	0.874164	0.270343	2065.83	36.3237	2041.19	30.4553	2058.75	14.0261	98.8071
Zg-132_58	116.903	0.492593	2.5846	0.863239	0.134127	1.24138	0.169059	1.34168	7.1875	1.13914	0.388883	0.845025	0.22186	2140.44	44.1101	2116.38	30.5496	2131.41	20.2922	98.8757
Zg-132_26	113.221	0.376577	2.51233	0.737013	0.139053	2.09867	0.169319	12.5414	7.59124	1.97114	0.398621	0.778809	0.161598	2185.94	66.8912	2161.56	28.6049	2179.93	35.4619	98.8848
Zg-132_48	294.563	0.283373	2.71557	0.740259	0.126173	0.742057	0.0911762	0.982073	6.39754	0.753693	0.369658	0.728779	0.576424	2040.35	26.3397	2026.9	25.3828	2033.19	14.3256	99.3411
Zg-132_21	255.563	0.213013	2.62855	0.808496	0.130518	0.84957	0.084355	3.89644	6.88941	1.04542	0.382177	0.79669	0.665501	2098.71	30.1036	2085.33	28.4104	2094.36	18.2361	99.3628
Zg-132_4	226.955	0.795162	2.47131	0.89922	0.138859	0.968722	0.245396	0.848984	7.84967	1.10936	0.405531	0.857968	0.563832	2205.52	33.4532	2193.08	31.8365	2210.44	20.1713	99.4358
Zg-132_16	226.672	1.06966	2.37968	1.03513	0.143261	0.970031	0.391693	1.99774	8.39437	1.27071	0.419746	1.00083	0.517267	2259.37	33.9301	2257.34	38.3119	2274.41	24.1306	99.9099
Zg-132_49	133.845	0.481401	2.6591	0.96062	0.128405	1.3048	0.151406	1.04845	6.69882	1.26177	0.377082	0.923222	0.369847	2062.8	45.7331	2061.18	32.4749	2068.07	22.509	99.9217
Zg-132_46	234.167	0.257141	2.64652	1.02581	0.129285	1.13344	0.0894565	1.47097	6.75015	1.0792	0.379217	1.07488	0.467124	2077.98	39.5581	2077.48	35.9242	2076.02	19.1238	99.9759
Zg-132_40	297.068	0.293435	2.64894	1.02796	0.128326	1.01453	0.0938314	1.02838	6.73037	1.06146	0.378957	1.00742	0.539981	2066.58	36.0264	2069.67	35.5094	2073.57	18.6214	100.149
Zg-132_19	101.197	0.628648	2.48087	1.04993	0.137372	1.30427	0.185488	1.29017	7.72268	1.21884	0.406227	1.04792	0.335706	2190.4	42.991	2195.56	38.9112	2195.07	21.8563	100.236
Zg-132_27	324.291	0.163327	2.66777	0.732029	0.126728	0.764464	0.0512682	4.71305	6.59058	0.871915	0.375205	0.688628	0.560161	2047.89	26.8828	2053.04	24.2134	2056.01	15.4621	100.251
Zg-132_52	483.57	0.0476309	2.66292	1.07914	0.127415	0.952653	0.0162508	1.82611	6.59292	1.04295	0.376991	1.02341	0.528501	2054.84	34.2802	2060.42	36.0327	2058.96	19.2721	100.271
Zg-132_1	661.746	0.485858	2.60207	0.878086	0.129726	0.806633	0.153706	1.17137	6.96076	0.784032	0.385096	0.820678	0.516465	2088.68	28.3366	2098.87	29.4648	2104.76	13.9851	100.488
Zg-132_55	256.536	0.116101	2.6736	1.02023	0.126618	0.841079	0.038384	1.8412	6.61398	1.24467	0.376854	1.04396	0.697479	2045.39	29.8195	2059.72	36.6286	2057.12	21.5062	100.701
Zg-132_3	406.857	0.255557	2.6693	0.888692	0.126188	0.861051	0.0830043	4.39918	6.60316	0.958031	0.375369	0.833311	0.26245	2038.93	31.3948	2053.43	29.2982	2057.35	16.5057	100.711
Zg-132_44	240.697	0.47678	2.56049	1.10099	0.130448	1.06528	0.156096	2.13931	7.07099	1.30993	0.391451	1.00381	0.549174	2105.29	39.6922	2128.06	36.5312	2116.63	22.8573	101.081
Zg-132_42	420.891	0.156143	2.56497	1.1248	0.129859	1.38776	0.0822191	12.1312	7.07211	2.19187	0.391554	1.08831	0.714327	2096.36	51.0218	2127.9	39.1907	2109.84	33.3744	101.505
Zg-132_8	461.5	0.11014	2.53623	1.05379	0.130442	1.16656	0.044854	5.12517	7.19069	1.2728	0.396527	1.05715	0.39704	2114.41	41.684	2151.55	38.6204	2132.15	22.542	101.756
Zg-132_9	296.286	0.166445	2.56285	1.07037	0.130187	1.20867	0.0599722	3.5649	7.04872	1.29278	0.393206	1.03085	0.511775	2088.91	42.6211	2135.76	37.6189	2121.8	22.6665	102.243
Zg-132_30	280.043	0.19612	2.64755	1.00654	0.125281	1.02118	0.0598074	1.51677	6.61007	1.22822	0.380466	1.01927	0.534054	2024.27	35.5506	2076.66	36.1009	2056.66	21.3978	102.588
Zg-132_59	187.838	0.507168	2.48373	0.943476	0.132934	0.984373	0.162514	1.32441	7.40951	1.01386	0.405082	0.92469	0.510353	2135.25	36.4577	2190.79	34.4201	2159.34	17.8805	102.601
Zg-132_41	160.003	0.22702	2.60317	0.772891	0.126566	0.959821	0.0729605	1.91031	6.75639	1.20872	0.384639	0.83469	0.62338	2043.2	33.4591	2096.69	29.8907	2076.11	21.0788	102.618
Zg-132_45	320.737	0.202339	2.63193	0.904092	0.125659	1.05011	0.0656564	1.56328	6.62133	1.05965	0.382207	0.925248	0.412547	2029.02	37.0411	2085.1	32.825	2059.12	18.7984	102.764
Zg-132_57	164.079	0.243111	2.65262	0.81102	0.123758	0.868583	0.0796526	1.75444	6.5004	0.941125	0.378677	0.779332	0.340691	2011.11	33.2081	2069.05	27.7085	2046.52	17.5363	102.881
Zg-132_47	218.94	0.270874	2.51266	1.36502	0.130888	1.13644	0.10847	2.30266	7.29636	1.41678	0.402143	1.36266	0.613867	2109.57	42.9004	2176.15	50.2854	2143.93	25.4343	103.156
Zg-132_25	205.415	0.544765	2.59323	1.0057	0.126428	1.25056	0.160101	1.80667	6.77247	1.44345	0.387205	1.02129	0.528808	2041.29	45.0645	2108.81	36.6329	2078.86	25.8881	103.308
Zg-132_15	144.97	0.720961	2.46859	1.19754	0.132845	1.30863	0.220076	2.18527	7.48177	1.34528	0.407017	1.17002	0.466945	2129.12	45.3665	2200.01	43.7025	2168.34	24.3974	103.33
Zg-132_37	240.856	0.205377	2.57428	0.987491	0.12699	0.86753	0.0611894	1.48233	6.84783	0.918809	0.39021	0.991738	0.609328	2052.27	30.5158	2122.66	35.8248	2090.45	16.1075	103.43
Zg-132_7	143.507	0.294883	2.55952	1.17841	0.127504	1.29799	0.122671	6.55662	6.93735	1.29988	0.39366	1.19028	0.447161	2053.36	46.0602	2137.82	43.19	2099.9	23.1393	104.113
Zg-132_60	114.462	0.325796	2.54384	0.972343	0.127226	1.19801	0.110358	1.36039	6.9402	1.07139	0.394451	1.0153	0.391562	2048.37	42.4737	2141.54	37.0901	2100.66	19.01	104.549
Zg-132_38	405.147	0.0387856	2.52003	0.950008	0.125715	1.03962	0.0166614	4.7967	6.92369	1.0408	0.399307	0.95519	0.437863	2030.01	37.355	2164.2	35.0479	2098.81	18.4289	106.61
Zg-132_61	149.274	0.376503	2.59074	1.68386	0.14414	2.38393	0.141837	3.36558	7.69608	2.37944	0.388579	1.72562	0.289014	2263.7	81.0757	2114.52	61.9824	2191.33	40.5551	93.4097
Zg-132_62	224.105	0.316937	2.64539	0.493523	0.126583	0.698743	0.0908769	1.42435	6.60373	0.702121	0.378961	0.496261	0.424847	2048.92	23.979	2070.82	17.5584	2057.89	12.5393	101.069
Zg-132_63	320.619	0.0831182	2.56596	0.536677	0.129196	0.575341	0.0323284	3.25548	6.99949	0.702153	0.390845	0.534021	0.508856	2082.76	20.1458	2126.02	19.3401	2109.42	12.5101	102.077
Zg-132_64	294.271	0.122508	2.50957	1.83119	0.155322	2.35033	0.127808	20.2218	8.57419	2.39697	0.401533	1.81845	0.41147	2391.97	79.7663	2174.09	67.1221	2288.77	41.5856	90.8912
Zg-132_65	279.727	0.113393	2.51045	2.11207	0.164222	1.8084	0.140918	2.87773	9.1544	2.47232	0.402449	2.03108	0.67988	2490.86	62.5852	2177.67	75.3915	2347.2	47.0173	87.4262
Zg-132_66	242.105	0.847292	2.62134	0.889332	0.13333	0.922558	0.250363	0.911057	7.06897	0.874284	0.383084	0.888457	0.44333	2136.75	32.4839	2089.64	31.7001	2118.57	15.5566	97.7953
Zg-132_67	680.951	0.390567	2.41912	0.503199	0.138052	0.523044	0.114296	2.58654	7.91133	0.589969	0.414364	0.506128	0.590256	2199.44	18.3451	2234.18	19.0895	2221.32	10.9851	101.579
Zg-132_68	310.284	0.215427	2.7501	0.784593	0.125847	0.925644	0.0648661	2.17281	6.34424	0.760464	0.365437	0.815165	0.254284	2032.65	33.4779	2006.71	27.9403	2022.89	13.3047	98.724
Zg-132_69	203.376	0.281406	2.65962	0.481554	0.127237	0.710029	0.104593	19.0789	6.64287	0.790805	0.376544	0.482185	0.419847	2056.04	24.8184	2059.77	16.9954	2063.56	13.8535	100.181
Zg-132_70	436.875	0.108617	2.91514	0.606151	0.160887	0.726002	0.126874	2.00269	7.61596	0.675851	0.344259	0.59364	0.359931	2467.09	24.1852	1906.39	19.6321	2186.92	12.5517	77.2727
Zg-132_71	232.02	0.122663	2.55881	0.550048	0.133938	0.820545	0.0362927	1.40093	7.20069	0.67239	0.39053	0.498227	0.323248	2146.74	27.4963	2124.65	18.0549	2137.13	11.1426	98.9708
Zg-132_72	160.633	0.345746	2.6693	1.2191	0.129495	1.2424	0.108	1.47973	6.71978	1.30596	0.377221	1.18356	0.506379	2082.5	43.8592	2061.66	41.8567	2072.02	23.4157	98.9992
Zg-132_73	520.833	0.44704	2.69249	0.517225	0.131293	0.62167	0.132655	0.94105	6.72305	0.692004	0.372385	0.510563	0.483652	2110.48	21.8617	2039.99	17.8802	2073.82	12.2143	96.6599
Zg-132_74	257.197	0.562027	2.77333	0.535314	0.129365	0.664167	0.175539	0.717213	6.41753	0.665305	0.360868	0.554566	0.421265	2084.46	23.2433	1985.66	18.9954	2033.18	11.6808	95.2603
Zg-132_75	584.968	0.528082	2.42888	0.51928	0.138031	0.567258	0.155119	0.804245	7.80793	0.604716	0.41264	0.522504	0.535846	2199.08	19.9062	2226.36	19.6458	2207.91	10.8677	101.24
Zg-132_76	459.556	0.533389	10.2306	0.677106	0.087696	0.954206	0.243654	1.02686	1.18186	1.10783	0.0982292	0.717109	0.569476	1369.04	38.0807	603.888	8.24107	792.268	12.6507	44.1103
Zg-132_77	447.063	0.486241	1.98337	1.63336	0.370455	3.49742	0.783856	4.61359	27.6929	5.01376	0.517233	1.79923	0.883895	3669.77	121.539	2686.84	79.9875	3283.14	101.208	73.2155
Zg-132_78	384.962	0.454306	2.60622	0.479271	0.128788	0.596624	0.159266	6.32817	6.76756	0.523024	0.384058	0.492499	0.331606	2076.88	21.1084	2094.6	17.6437	2080.43	9.23969	100.853
Zg-132_79	375.693	0.491742	2.58029	0.497036	0.133125	0.678622	0.158688	2.04617	7.07318	0.721779	0.388518	0.491019	0.40451	2137.88	24.6386	2115.33	17.7325	2118.61	12.8225	98.9452
Zg-132_80	421.899	0.266095	2.61016	0.671222	0.126118	0.658149	0.0793774	1.19971	6.64173	0.936224	0.383416	0.616073	0.706973	2040.07	23.3077	2091.47	22.0773	2065.13	15.8401	102.519
Zg-132_81R	448.331	0.185894	2.75167	0.887451	0.144702	1.50514	0.103508	4.04457	7.16505	1.44627	0.362448	1.01694	0.312523	2275.58	53.2462	1992.99	35.049	2129.39	26.3342	87.5813
Zg-132_82C	708.915	0.113721	2.82616	0.614526	0.15435	1.28863	0.117115	4.10836	7.46418	1.4351	0.354471	0.623124	0.455646	2377.65	42.5478	1955.04	21.107	2160.8	24.7823	82.2254
Zg-132_83	223.501	0.549663	2.78284	0.794359	0.125648	0.789614	0.176562	8.34711	6.21976	0.811577	0.360888	0.795094	0.501343	2032.67	27.8015	1985.41	27.1452	2005.55	14.1544	97.6747
Zg-132_84	935.263	0.324555	4.60347	0.924233	0.253859	1.18863	0.438163	2.08672	7.56984	1.47698	0.218401	0.871598	0.674757	3195.2	38.2219	1272.62	20.1489	2171.97	27.6616	39.829
Zg-132_85R	3461.8	0.262368	33.4583	3.55063	0.375422	0.739874	0.746003	0.860771	1.75662	4.41472	0.0335815	4.26535	0.98396	3808.98	22.4412	212.415	17.756	999.274	53.3039	5.5767
Zg-132_86C	451.11	0.220102	4.49281	3.48488	0.206239	2.82779	0.28607	5.57016	6.51103	1.43194	0.244402	3.57714	0.615473	2834.84	95.1732	1398.02	90.0142	2041.62	25.4475	49.3157
Zg-132_87	147.677	0.658621	2.6633	0.872104	0.125027	1.20405	0.196769	1.78508	6.42617	1.20963	0.377102	0.871782	0.482868	2028.64	38.9291	2061.69	30.7481	2042.07	21.2905	101.629
Zg-132_88	320.425	0.461425	2.57804	0.753229	0.13355	0.725172	0.150632	2.23564	7.15601	0.719902	0.388478	0.693986	0.58568	2144.28	26.4955	2114.8	25.0961	2129.42	12.9534	98.6252
Zg-132_89	255.726	0.137572	1.29572	0.660848	0.346358	0.542656	0.121647	5.19588	36.9564	0.682716	0.775118	0.649713	0.66553	3687.87	16.5058	3696.75	36.6552	3690.12	13.4642	100.241
Zg-132_90	558.495	0.109445	2.80493	0.603776	0.124535	0.626529	0.0360558	3.02675	6.12386	0.658578	0.357862	0.6124	0.454772	2021.14	20.8431	1971.18	20.7542	1992.02	11.3756	97.528
Zg-132_91	338.253	0.160208	2.57202	0.699919	0.129188	0.797	0.0490229	1.80307	6.94554	0.686229	0.390147	0.687633	0.348525	2081.37	27.9171	2122.64	24.9148	2103.19	12.0853	101.983
Zg-132_92	749.42	0.217592	1.87463	2.14018	0.373278	2.25512	0.78449	2.66164	27.7705	3.00066	0.540175	2.1077	0.581843	3791.5	71.7804	2779.26	95.1039	3399.59	57.0407	73.3025
Zg-132_93	252.26	0.171156	2.92394	0.774181	0.127444	0.947954	0.0497443	1.81216	6.0536	1.04913	0.343248	0.758243	0.483328	2063.29	31.7943	1901.52	25.0156	1984.62	17.1775	92.1599
Zg-132_94	265.251	0.398869	2.6969	0.616494	0.123693	0.6578	0.128529	3.56213	6.35976	0.757209	0.371545	0.661536	0.591302	2004.68	23.4292	2035.63	23.023	2024.57	13.1665	101.544
Zg-132_95	280.877	0.125715	2.72532	1.12093	0.124005	1.11942	0.0406951	1.97689	6.34161	1.23655	0.368683	1.09157	0.557942	2008.57	39.9816	2022.11	38.009	2021.95	21.8219	100.674
Zg-132_96	128.062	0.327353	2.3944	1.44514	0.134897	1.6645	0.110494	1.61452	7.86588	1.64002	0.420457	1.37392	0.367194	2151.59	60.4557	2260.73	52.6784	2212.08	29.8363	105.072
Zg-132_97	634.5	0.0658797	2.49238	0.854674	0.214597	2.37118	0.306356	5.92361	12.1457	2.98367	0.403072	0.835121	0.799545	2901.57	77.871	2186.75	32.5189	2589.89	54.4154	75.3644
Zg-132_98	137.932	0.568101	2.50251	0.832456	0.134585	1.11638	0.171479	1.18775	7.50258	1.22486	0.399485	0.898211	0.508006	2151.56	38.1137	2165.6	33.1853	2170.21	22.6326	100.653
Zg-132_99	259.568	0.42405	2.62051	0.524825	0.128478	0.610284	0.129309	1.78272	6.86126	0.641321	0.382706	0.539405	0.531075	2072.41	21.6594	2088.18	19.1532	2092.03	11.422	100.761
Zg-132_100	203.033	0.275264	2.61246	0.484775	0.137495	0.658108	0.121536	0.921945	7.36019	0.793601	0.383256	0.48364	0.49652	2197.53	24.6971	2091.17	17.2778	2154.84	14.1576	95.1602
Zg-132_101	374.316	0.320493	2.47949	1.49272	0.202947	1.9266	0.305383	3.35221	11.5951	2.23361	0.403435	1.28206	0.441064	2852.05	59.6398	2183.12	47.7987	2574.1	39.42	76.5455
Zg-132_102	352.25	0.119269	2.50399	0.47472	0.134136	0.617131	0.0666574	2.98696	7.52868	0.68731	0.399845	0.471125	0.450578	2149.89	21.5541	2168.01	17.3641	2175.4	12.3037	100.843
Zg-132_103	164.512	0.325954	2.53611	0.525469	0.128731	0.817932	0.0987474	3.59904	7.14119	0.716554	0.393318	0.53736	0.308873	2078.12	27.3475	2137.49	19.6438	2127.29	12.7411	102.857
Zg-132_104	84.5757	0.611237	2.53945	0.570459	0.130975	0.834185	0.180933	1.01966	7.24383	0.829657	0.395081	0.564982	0.36482	2102.87	29.2156	2145.51	20.6346	2141.35	15.265	102.028
Zg-132_105	305.388	0.361256	2.58476	0.396287	0.12796	0.553248	0.103328	0.623986	6.96011	0.570543	0.387504	0.397244	0.379154	2066.03	19.5324	2110.84	14.2899	2105.07	10.1171	102.169
Zg-132_106	550.326	0.77222	2.57979	2.19673	0.139086	1.82577	0.283887	2.8011	7.5783	1.65982	0.391027	2.0959	0.615614	2208.88	60.9475	2125.45	76.3041	2180.17	30.3594	96.2233
Zg-132_107	669.36	0.0439771	2.65518	0.601988	0.123017	0.454877	0.0154859	3.39683	6.53364	0.705062	0.378023	0.61178	0.738836	1999.74	16.849	2066.13	21.5642	2048.54	12.3657	103.32
Zg-132_108	367.852	0.367006	2.56522	0.623606	0.127526	0.738275	0.125335	3.52473	6.9586	0.729171	0.389207	0.680031	0.459923	2063.3	24.9561	2122.48	23.3668	2106.83	12.2761	102.868
Zg-132_109	296.511	0.145084	2.63492	2.31853	0.137298	2.99932	0.068548	5.30764	7.29002	2.45593	0.382952	2.42747	0.145143	2176.93	108.929	2087.75	85.9921	2143.79	43.9604	95.9034
Zg-132_110	148.442	0.399751	2.60789	0.737052	0.125349	1.08818	0.116398	1.16668	6.72178	0.957181	0.383451	0.797585	0.370798	2025.14	38.5031	2091.4	28.6189	2073.27	17.151	103.272
Zg-132_111	725.262	0.0763169	2.95713	0.810846	0.25732	0.996466	0.415065	1.43146	12.1056	1.18488	0.338944	0.834123	0.525485	3226.62	31.8672	1881.1	27.1137	2610.62	21.6578	58.2995
Zg-132_112	268.796	0.497729	2.47426	0.512364	0.134574	0.595068	0.144804	1.30075	7.55342	0.588867	0.403912	0.541524	0.471855	2153.95	20.8211	2186.22	20.2115	2177.92	10.7082	101.498
Zg-132_113	224.282	0.220694	2.6547	0.548895	0.124301	0.664742	0.0646412	0.96881	6.51924	0.705437	0.376546	0.516684	0.474691	2013.28	23.67	2062.52	19.0612	2046.59	12.4116	102.446
Zg-132_114	461.414	0.479244	2.61106	0.472315	0.130564	0.639992	0.150359	1.07518	6.94169	0.689112	0.38384	0.462655	0.522405	2103.77	23.3855	2093.65	16.5792	2102.11	12.2826	99.5189
Zg-132_115	227.588	0.104763	2.64101	0.492667	0.125988	0.633528	0.04116	5.24712	6.62872	0.699486	0.379507	0.477419	0.459015	2037.78	22.4609	2073.44	16.9938	2063.3	11.7583	101.75
Zg-132_116	221.014	0.139337	2.62994	0.487382	0.12578	0.608289	0.0419525	1.72533	6.6309	0.692996	0.380654	0.509757	0.486904	2041.41	21.3671	2078.69	18.0986	2061.59	12.2167	101.826
Zg-132_117	248.613	0.246107	2.6425	0.527589	0.125267	0.573799	0.0802101	2.81593	6.57204	0.643569	0.37882	0.533514	0.418973	2028.43	20.4098	2070.11	18.9758	2054.1	11.339	102.055
Zg-132_118	41.8149	0.315157	2.46223	0.773304	0.134069	1.47505	0.0893605	1.88819	7.5	1.35924	0.407608	0.78068	0.235337	2137.8	50.8661	2202.99	29.0734	2173.27	25.5062	103.049
Zg-132_119	371.359	0.336914	2.56302	0.53686	0.131464	0.741719	0.108512	1.73426	7.06288	0.797902	0.39014	0.579433	0.503245	2112.65	25.5879	2126.92	19.5114	2117.52	14.3541	100.676
Zg-132_120	104.081	0.599976	2.45509	0.677229	0.137673	0.845639	0.176091	0.843116	7.71951	0.838549	0.408243	0.644757	0.475561	2190	28.8836	2205.74	24.0746	2198.55	14.6018	100.719
Zg-132_121	196.06	0.497333	2.54049	0.560581	0.132797	0.703946	0.159272	2.04982	7.26122	0.792264	0.394872	0.560255	0.562221	2133.33	23.7245	2144.57	20.4221	2141.56	14.1863	100.527
Zg-132_122	225.412	0.933525	2.61184	0.78947	0.125068	0.953136	0.276466	1.99202	6.6504	0.862404	0.383175	0.723197	0.366556	2021.87	34.2275	2090.17	25.8445	2063.98	15.3508	103.378
Zg-132_123	415.89	0.30495	2.68744	1.39866	0.131241	1.44524	0.103159	1.87114	6.76536	1.98664	0.373883	1.369	0.677945	2108.38	50.6125	2046.52	48.0976	2077.46	34.7633	97.0661
Zg-132_124	444.17	0.197136	2.46129	1.69782	0.164622	1.56228	0.143356	2.05731	9.29698	1.88201	0.405919	1.45328	0.594557	2495.78	52.4721	2211.68	63.5734	2363.18	35.4218	88.617
Zg-132_125	329.796	0.110832	2.82621	1.09867	0.135584	1.03911	0.0656498	3.56661	6.71072	1.05143	0.356355	1.10221	0.408548	2172.36	39.2671	1963.28	37.2193	2075.34	19.8159	90.3756
Zg-132_126	295.095	0.156263	2.56811	0.917177	0.135232	1.16344	0.0793875	5.57995	7.3345	1.2788	0.390893	0.912804	0.490127	2159.68	40.9518	2125.99	33.0635	2150.05	22.9427	98.4401
Zg-132_127	809.51	0.576353	3.06626	1.08859	0.126656	0.78242	0.210627	0.877398	5.73912	1.49903	0.326305	1.1922	0.854354	2054.87	24.692	1819.14	37.9309	1939.32	23.6889	88.5281
Zg-132_128	166.174	0.259554	2.66812	1.28259	0.125665	1.74608	0.0859652	1.98302	6.5539	1.56302	0.376085	1.27524	0.240538	2030.61	61.7152	2057.15	44.9393	2051.19	27.6963	101.307
Zg-132_129	378.548	0.118916	3.42472	1.60261	0.159927	0.738863	0.132274	1.9782	6.63468	1.78568	0.298844	1.69914	0.917819	2449.58	24.8477	1681.44	49.9323	2053.92	30.7616	68.642
Zg-132_130	474.777	0.317382	2.57732	0.620394	0.146601	0.542961	0.133811	1.10023	7.91375	0.582073	0.388802	0.619682	0.526252	2302.77	18.9759	2116.29	22.2326	2219.87	10.4857	91.902
Zg-132_131	247.19	0.176305	2.579	0.877474	0.126828	0.823664	0.0565989	1.13831	6.87448	0.930824	0.389673	0.844093	0.473664	2048.76	29.5199	2120.1	30.6422	2093.13	16.4612	103.482
Zg-132_132	708.552	0.777977	2.6141	0.834153	0.129132	0.906648	0.252262	0.710318	6.84638	0.98532	0.383753	0.826364	0.58634	2081.44	31.7645	2093.01	29.5578	2090.01	17.5221	100.556
Zg-132_133	368.923	0.668418	2.33427	2.39844	0.214319	4.70299	0.490343	3.57282	12.8159	5.65598	0.432182	2.29	0.511652	2906.01	149.58	2313.06	89.5978	2645.07	102.308	79.5959
Zg-132_134	191.921	0.389505	2.47994	0.729073	0.133598	0.695919	0.120265	3.00507	7.50738	0.817593	0.404439	0.717977	0.580411	2139.99	24.0256	2188.04	26.8734	2171.21	14.6277	102.245
Zg-132_135	132.063	0.403646	2.48783	0.647169	0.133595	0.77089	0.121705	0.902289	7.44903	0.719791	0.403656	0.64012	0.383884	2138.75	26.6081	2184.74	23.7466	2166.95	12.3057	102.15
Zg-132_136	191.311	0.135054	2.66783	1.67291	0.131375	2.20704	0.0618917	8.24515	6.8776	2.41179	0.378313	1.59372	0.405368	2097.62	78.0221	2066.24	56.485	2087.76	43.3756	98.5038
Zg-132_137	9.37693	1.99082	2.41011	4.16056	0.720971	1.84457	1.85269	1.3575	49.0493	6.83267	0.470942	5.79063	0.957696	4716.66	51.9635	2429.2	217.403	3866.26	113.628	51.5026
Zg-132_138	178.748	0.490877	2.64595	0.539004	0.125786	0.771962	0.147517	1.93606	6.57085	0.739491	0.377791	0.587704	0.27644	2037.47	26.1822	2065.11	20.8015	2053.31	13.1448	101.356
