# Supplementary material for: Petrogenesis and geodynamic implications of Ediacaran rocks from the Sirwa massif (Central Anti-Atlas); insights from U-Pb geochronology, whole-rock geochemistry, and Sm-Nd isotopes
Source: Copernicus journal article supplement (doi:10.5194/egusphere-2025-6178), 2025-12-18
Supplement: Supplementary file [file egusphere-2025-6178-RC1-supplement.pdf]

Dear Editor,

Manuscript "Petrogenesis and geodynamic implications of Ediacaran rocks from the Sirwa massif (Central Anti-Atlas); insights from U-Pb geochronology, whole-rock geochemistry, and Sm-Nd isotopes" by Abdelhay Ben-Tami and co-workers represents a potentially interesting contribution to the ongoing discussion concerned with the nature and petrogenesis of Neoproterozoic (Pan-African) magmatic and sedimentary rocks in the Anti-Atlas Belt (Morocco), and their geodynamic significance. The text brings new, precise whole-rock geochemical dataset, including some Nd isotopic compositions, in situ LA ICP MS U-Pb ages of zircon. However, the presentation, interpretation and discussion of these data could be improved significantly.

The text is in places confusing, wordy, and/or difficult to follow. Also, the petrogenetic models should be better introduced and justified. The same is valid also for the geodynamic setting. In fact, after reading the manuscript carefully, I am still not sure what the preferred scenario is.

Hereafter I give some, usually more general comments; for the more concrete remarks/edits, please refer to the attached annotated PDF document.

To sum up, I cannot recommend the publication of the reviewed manuscript in the present form, nad requires revision. I trust that the authors will be able to revise the manuscript fundamentally, incorporating most of the changes and addressing my criticism, so that it could be published and find its interested readers.

Prof. Vojtěch Janoušek  
Czech Geological Survey/Charles University, Prague

## **General comments to the style, language and grammar of the manuscript**

- The Results and Discussion parts should be strictly separated.
- The manuscript is written in English with numerous mistakes. The language requires revision by native speaker. The text tends to wordy and repetitive, and in places does not flow linearly. It can be certainly condensed substantially without a loss of its informative value. Currently it is extensively long. I urge the senior co-authors (and native speakers among them) to take care of these issues.
- Reduce, if possible, the plethora of local names. All of these remaining need to be shown on some map.
- Consider capitalization of the whole formal names, including words such as Orogeny, Group, Pluton or Complex.
- All abbreviations are to be explained just once, at the first occurrence. Except in figure captions, where I would always explain all of those present.
- Past tense should be used always when referring to events in geological past or previous publications.
- Hypotheses should be expressed by some element of uncertainty, e.g. by conditionals.
- In English text (e.g., Table 2), one should use exclusively decimal points, and not commas.
- All the measured/calculated values should be rounded up to their precision.
- All Figures (and their parts), Tables and electronic supplementary materials (ESM) should be quoted in the text, and exactly in the correct sequence.
- Define how you calculate some geochemical parameters. For Eu anomalies, use the standard  $\text{Eu}/\text{Eu}^*$  notation. Add all these extra parameters to the data table.

## **Graphics**

- The quality and readability of all graphs should be improved. The isotopic plots are terrible.
- Plotting symbols/colours should be chosen carefully and kept the same for all plots.
- In geochemical plots, label the samples specifically mentioned in the text.
- Add references as appropriate, including those referring to the plotted geochemical reservoirs and trends. Format those on plots according to the Journal in house rules.
- Avoid using underscore, \_ as a replacement for space.
- In some figures (most notably Fig. 1), text seems to be interlaced, and is very difficult to read. But maybe it is just some compatibility issue.

## **Typography**

- More attention should be paid to correct, and consistent, typography, placing spaces where necessary, correctly using hyphens and en dashes, etc. For example, the ranges should be indicated by en-dashes, without spaces around. Minus is en-dash, with no space following.
- Special care should be paid to correctly marking super- and subscripts, e.g. in names of major-element oxides.

- There should be always a space between a number and unit, or a percent symbol. There is no space before punctuation marks such as .:;.
- There should be no space between a sign and the number, e.g. +5.5 or –2.7.

## References

- The authors should adhere strictly to the journal's style as given in the Instructions to authors.
- What is the logic behind ordering of multiple references in the text? I would say that they are currently completely erratic. Order them consistently; chronologically, or alphabetically, depending on your preference.
- The same applies for Bibliography. See <https://www.solid-earth.net/submission.html#references>. Check that if there is more than one paper in the same year for a first author (independent of the rest of the team), a letter (a, b, c) is added to the year both in the in-text citation as well as in the reference list.
- The bibliography is rather accurate; there is only a handful of references missing in the list, see the annotated PDF.

## Abstract

[23] Instead of sample names, specify the lithologies dated.

[28] Formed from a dominantly juvenile, mantle-derived source – confusing. Do you mean direct contribution of mantle-derived basaltic melts or remelting of metabasic crust?

## Introduction

[39–43] Complex sentence, revise.

[47–48] Repetitive. It was said above, combine.

[58] Sirwa or Siroua as on the map?

[60] Mafic and intermediate units? Please be more specific.

## Geological setting

[73] Distinguish between orogeny (the orogenic process) and orogen (its product).

[114–148] Are all these details and local names indeed necessary?

[128] Provide errors of age determinations, and dated material/method, whenever possible.

[128] Slightly younger? Probably identical within the error.

[Table 1] Should be moved to electronic supplement. What is the logic behind ordering the individual samples?

## U–Pb zircon geochronology – methodology

[154] Show sample Zg-119 on the map.

[159]  $\pm 2$  sigma error?

## Petrography

[175] I would rather call this texture ophitic(?)

[189] pyroxene? Could you please be more concrete, or at least to write “clinopyroxene”?

[189] List the minerals in the order of decreasing modal abundance.

### **U–Pb zircon geochronology**

[220] Moderate in size? Please be more concrete.

The CL images are too tiny to see any detail.

[235–236] Both? What do you refer to?

[238] Poor style. The age of the sandstone Zg 132 has not been introduced yet.

[243–252] Perhaps it would be interesting to discuss the youngest zircons constraining the maximum age of sedimentation.

### **Whole-rock geochemistry**

[265] But, if I understand it right, a lot of them are altered.

[274] In general, label the samples specifically mentioned in the text on the geochemical plots.

[280 and elsewhere] The Eu anomalies should be expressed in consistent way.  $\delta\text{Eu}$ ,  $\text{Eu}/\text{Eu}^*$ ,  $\text{N Eu}/\text{Eu}^*$  are all used.  $\text{Eu}/\text{Eu}^*$  is the standard.

[284] Be specific: what is the “early gabbro sample from Sirwa”?

[296] What is the unit of  $\text{Na}_2\text{O} + \text{K}_2\text{O}$ ? Is their ratio calculated by weight?

[297–298] These rock groups are not distinguished in the plot.

[299] Some nomenclature diagram is to be shown to name the rocks discussed in this text.

[309] This is a hypothesis that should not appear in the Results, but in Discussion. K-feldspar fractionation would have the same effect.

[316–320] Very confusing. First of all, such a discussion is out of scope of the Results section. There is a lot of local information we are not familiar with and these analyses are not plotted here.

### **ESM 4**

- In text and in the relevant ESM table: round off all the data to match the precision of each of the oxides/elements (some are precise to three decimal places, others to none, I suspect). Even add trailing zeroes whenever needed to indicate the real precision.
- Mg numbers are calculated wrongly! The calculation should be based on molar and not weight percentages.

### **Sm–Nd isotopes**

- The Analytical techniques (ESM 2) lack the necessary details of Nd isotopic data recalculation, including the relevant references for decay constant, CHUR composition and model ages computations.

### **Table 2**

- Sample names should come into the first column.
- Add a column with age (Ma) used for correction each of the analyses.
- Format all super- and subscripts as appropriate.
- Show initial Nd ratios, but not the present-day epsilon values.

- The column with initial ratios should be labelled  $\varepsilon_i^{Nd}$  or similar. Some analyses were not recalculated to 570 Ma.
- Model ages should be given in Ga and rounded to two decimal places.
- What is the difference between *TDM (Goldstein) Ma* and *TDM Ga*? Are these single- or two-stage models?  
Give all these details of model age calculations in the Analytical techniques. As you know, single-stage ones are more appropriate for mantle-derived, mafic rocks, two-stage model ages (Liew and Hofmann 1988) for crustally-derived, felsic rocks.
- The initial ratios of Nd isotopes and epsilon values should have a consistent – and simple – symbology. Ideally, they should be labelled by subscripts '570' or '620', directly indicating the age used for their correction. E.g.  $\varepsilon_{570}^{Nd}$ .

[338] There are just two values for Saghro rocks, it is thus misleading to describe them as an interval.

[341–343] This is misconception! Intermediate positive epsilon values *per se* may be equally well explained by derivation from less depleted mantle domains, or remelting of fairly juvenile metabasic crust. Additional evidence is needed.

[345–346] This, and some other parts of this section, should move to Discussion.

[351–352] This again should be moved to the Discussion, and additional petrological and geochemical evidence should be considered, also from literature.

What do you mean, a mantle source contaminated by older crustal component? On which evidence? Why not, for instance, AFC or assimilation of crustal material during ascent of doleritic magmas? What compositions of mantle and crust do you envisage? Was the mantle close to canonical depleted mantle, or CHUR-like? Do you really assume that the felsic magmas were generated from mantle-sourced magmas? Or did they come from remelting of a pre-existing crust?

[352–353] If the dolerite came from CHUR-like mantle, the DM model age is just meaningless.

[352–359] Again, this belongs to Discussion.

[358–359] Last sentence seems an overinterpretation of your data.

Figure 8:

- Plotting symbols/colours should be the same like in other plots. Here are even used the same symbols in panels a–b vs. c–d for different things!
- It is graphically very poor, having been apparently exported directly from Excel. It lacks any formatting – superscripts, epsilon letters etc. Needs to be redrawn.
- I suggest a better representation – in the form of two plots: (1) a Nd growth diagram (age vs. epsilon Nd, it can also incorporate the model ages and (2) some independent geochemical parameter (e.g., SiO<sub>2</sub>), vs. initial epsilon Nd values. See below, BTW graphs were generated by our software GCDkit (Janoušek et al. 2006) and obviously would need to be supplemented by literature data.

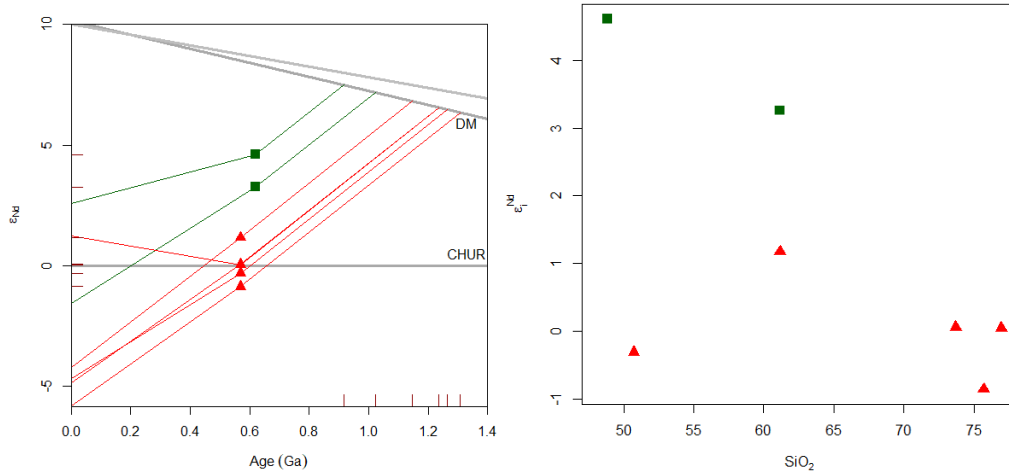

### Discussion – Petrogenesis

This chapter is very confusing and scientific argumentation is not sufficient or misleading. It needs to be rewritten completely.

[374–380] There are no such plots shown, neither in the text, nor in the ESM 4. So, the hypothesis cannot be tested. Add these plots, justify your model and do not forget to consider alternatives, such as partial melting. Perhaps better would be diagrams against Mg#, rather than Zr.

[380–385] Mg# are calculated wrongly, so this paragraph needs to be rewritten. What is the evidence for this mixing?

[386] I do not know this “contamination-sensitive” diagram. Contamination by what material? How is it supposed to work? Give a reference. Note that in most magmatic rocks, La and Ce will be strongly correlated and behaving very similarly during fractional crystallization or partial melting. I guess this projection is of very little value in distinguishing closed-system differentiation from continental crustal contamination and I would drop it.

Using Nd isotopes for this purpose is definitely a much more powerful approach.

[389–392] But not like this! The “mixing model” in ESM 4 is calculated without taking the contrasting Nd concentrations (ppm) in the both end-members. The correct approach is (Janoušek et al. 2016):

The mixing equation for two end-members, 1 and 2, can be seen as a mean of isotopic ratios ( $I_1$  and  $I_2$ ), weighted by their respective mass-fractions in the mixture. Marking the mass fraction of the end-member 1 as  $f_1$ , (with  $f_1 + f_2 = 1$ ) and respective concentrations  $C_1$ ,  $C_2$  and  $C_M$  (Faure 1986):

$$I_M = I_1 \left( \frac{C_1}{C_M} \right) f_1 + I_2 \left( \frac{C_2}{C_M} \right) (1 - f_1) \quad (0.1)$$

Where:

$$C_M = f_1 C_1 + (1 - f_1) C_2 \quad (0.2)$$

[398–340] I cannot see this, rephrase. Perhaps this is not the best projection, either.

[402–403] This diagram is designed solely to judge the nature of crustal protoliths melted. It does not make sense for mantle-derived rocks and also does not show any effects of

fractional crystallization and contamination of primary magmas. Revise.

[404] Enriched in what sense? Enriched mantle? The whole sentence is a bit daring and premature. Neodymium isotopes need to be assessed first.

Fig. 9

- I would omit literature data, as only several points are plotted on a single panel.
- Instead of panels a, b I would rather plot Nb/Yb vs. Th/Yb and Nb/Yb vs. TiO<sub>2</sub>/Yb (Pearce 2008) – the first you have as a current Fig. 12b.
- Panel b: normalized by what (reference).
- Panel c: IAT is not shown.
- All abbreviations need to be explained. Give references for compositions of each of the reservoirs plotted.

[411] Why there are not discussed effects of alteration like in the case of SG above?

[414] Again, these diagrams are not plotted.

[421] Calcic phase? Feldspars.

[423–425] High LREE contents can be also due to direct derivation from crustal sources and would be further modified by fractional crystallization.

[424–425] Speculations.

[427] The “trend” is too scattered to reveal anything. The plutonic rocks are not distinguished on the plot.

[431–432] Hydrous metasomatism? What do you mean? Why should be P anomalies linked to Nb and Ti depletions?

[442] Or Nb and Ti anomalies can reflect subduction setting.

[443–444] I cannot understand the bit starting from “as supported by epsilon Nd values...”

Fig. 10

- Not only OG, but also SG rocks. Add legend.
- Technically speaking, Harker plots are binary diagrams of SiO<sub>2</sub> vs. major elements, not traces.
- Nickel will not show anything else than Cr, and determinations of the former are rounded to tens ppm, so rather imprecise. Omit. Are the rocks fresh enough so that Rb and Ba can be used?
- How were the BA, AFC and FC trends obtained? Reference? Assimilation of what? How much? Fractional crystallization of what minerals and in which proportions? What was the degree of crystallization? What Kd values were used (references)?
- Panel b – for intermediate and felsic rocks, the La concentration will be controlled, to a large extent, by accessories, such as allanite or monazite.
- Panel c – why Y/Nb of 1.2? Would not be Nd isotopes much better for this purpose?

[445] What is “enriched continental crust”?

[448] Moderate epsilon Nd values? Not clear, be more specific. Everything depends on local mantle composition, it could have been CHUR-like easily.

[450] What is “sediment zone enrichment”?

[448–452] I am completely lost. What is your preferred scenario? Genesis from earlier (oceanic) subduction-modified mantle or contamination (AFC) of E-MORB-like melts by continental crust?

Fig. 11

- Explain all abbreviations and give the references for compositions of various average mantle and crustal reservoirs.
- Panel c: missing is explanation of the trends for various processes. How were they constructed (see also my previous comment)? BABB symbols look just terrible.

Fig. 12

- Explain all abbreviations and give the references for compositions of various average mantle and crustal reservoirs.
- What is the difference between the Ta/Yb vs. Th/Yb and Nb/Yb vs. Th/Yb projections? Should be giving moreless the same information....
- Panel a: missing is reference, explanation of the trends. How were they constructed?

### Discussion – Geodynamic implications

Again, this section requires a thorough revision.

[466] Show it! This is not acceptable.

[469] Or simply rifting. I would suggest some other diagrams that could help you resolving the geodynamic setting, namely those of Wood (1980), Cabanis and Lecolle (1989), Pearce et al. (2021) or Shervais (2022). Surprisingly, the basic rocks of the SG and OG look like continental flood basalts in the Ti/V vs. Th/Nb plot of Shervais (2022). I do not know much about local geology, but is any role of plume ruled out?

La/10 – Y/15 – Nb/8 (Cabanis + Lecolle 1989)      Triangular diagrams of the Th-Hf-Ta-Zr-Nb system, Wood 1980

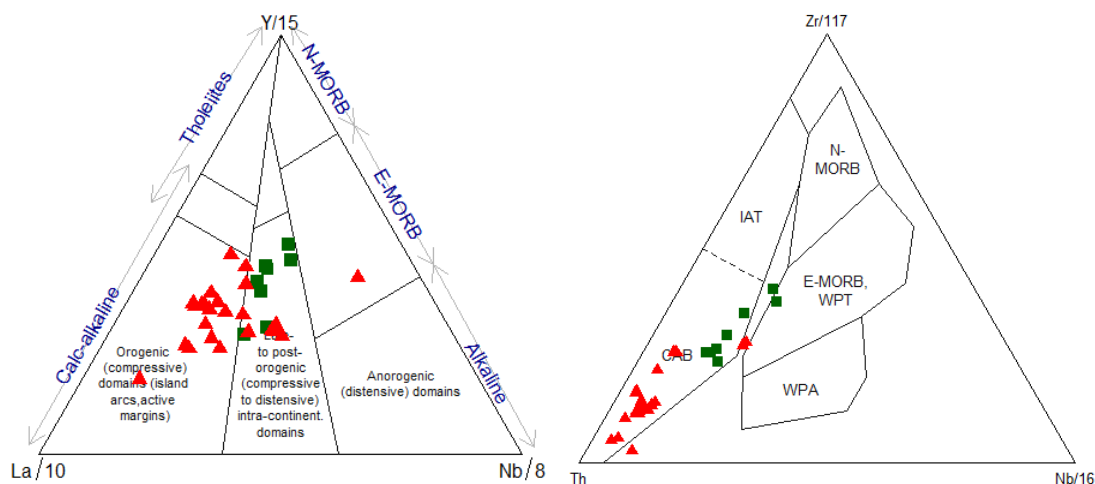



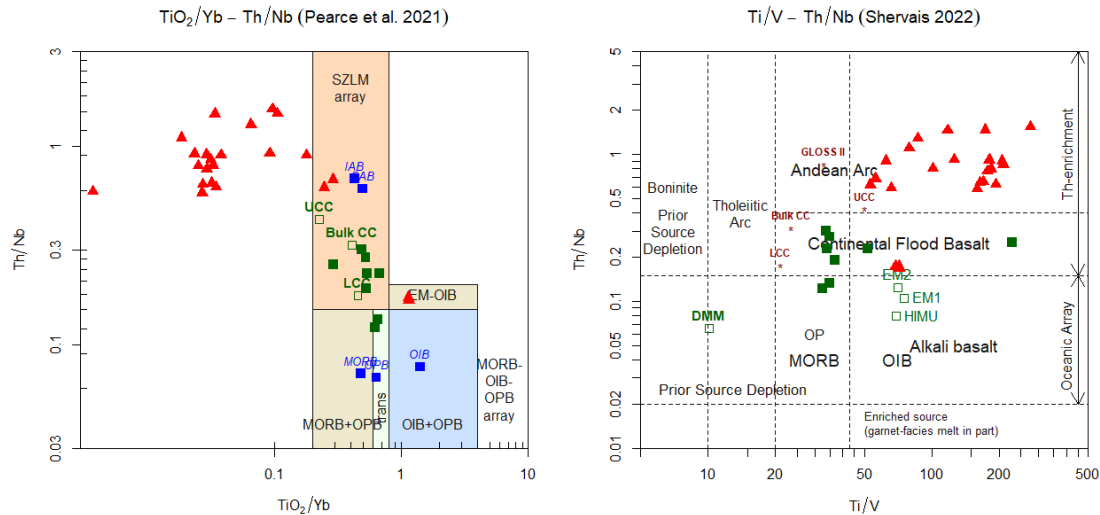

[472] Why is low U/Th ratio indicative of active margin signature?

[473–474] Normalized to what? To my eyes, the SG nicely follow the NMORB–OIB array. CAB should have higher ThN.

[476–479] References missing.

[501] A fragment, a sentence should have a verb. Rephrase. Fig. 11a shows Y vs. Zr, not K, Rb, Ba etc. Plus, these are extremely mobile elements, could not they be compromised by alteration?

[508] Be specific, how?

[510] And what was the cause of such post-collisional event?

[515] evolution?

## Discussion – U–Pb ages

[518] Please specify the sample lithologies, this is more important than the sample numbers.

[520] Extension of the magmatism? Rephrase.

[532] How about the dating by Ferraq et al. (2024)?

[535] What is sub-alkaline-calcic?

[538] Did you observe any inheritance?

[549] What is “a prolonged tectono-magmatic event emplaced over multiple pulses over the whole Anti-Atlas belt”?

[551] “SLIP deposited in a strictly continental environment”? I cannot follow this.

[551–556] Tedious and repetitive. Condense.

[558–560] Rephrase and expand the part dealing with regional correlation of the Cadomian arc magmatism and how does it relate to the inferred geodynamic setting of the studied rock units.

[590–593] I cannot follow this argument. Clarify.

[595] “The mono-peak...” does not make any sense to me.

[601] Cryogenian should be older than 635 Ma. These sediments are Ediacaran, or younger.

[610] Reference missing here.

Fig. 12

Explain all the abbreviations.

## Conclusions

[627–628] What is the evidence for contamination of the mantle source by continental crust?  
How does it go with the presumed oceanic subduction context?

[636] How about your sediments?

[637–638] “post-collisional syn-orogenic magmatism (WAcadomian arc)”? I am again lost.  
Regardless, how can you infer this from U–Pb ages only?

## References used

- Cabanis B, Lecomte M (1989) Le diagramme La/10–Y/15–Nb/8: un outil pour la discrimination des séries volcaniques et la mise en évidence des processus de mélange et/ou de contamination crustale (The La/10–Y/15–Nb/8 diagram: a tool for discrimination volcanic series and evidencing continental crust magmatic mixtures and/or contamination). *C R Acad Sci Paris, Série II* 309:2023–2029
- Faure G (1986) *Principles of Isotope Geology*. 2 edn. John Wiley & Sons, Chichester
- Ferraq M, Belkacim S, Cheng L-Z, Davies JHFL, Perrot MG, Ben-Tami A, Bouabdellah M (2024) New geochemical and geochronological constraints on the genesis of the Imourhssen Cu±Mo±Au±Ag porphyry deposit (Ouzellagh-Siroua Salient, Anti-Atlas, Morocco): geodynamic and metallogenic implications. *Minerals* 14:832
- Janoušek V, Farrow CM, Erban V (2006) Interpretation of whole-rock geochemical data in igneous geochemistry: introducing Geochemical Data Toolkit (GCDkit). *J Petrol* 47:1255–1259
- Janoušek V, Moyen JF, Martin H, Erban V, Farrow C (2016) *Geochemical Modelling of Igneous Processes – Principles and Recipes in R Language. Bringing the Power of R to a Geochemical Community*. Springer, Berlin
- Liew TC, Hofmann AW (1988) Precambrian crustal components, plutonic associations, plate environment of the Hercynian Fold Belt of Central Europe: indications from a Nd and Sr isotopic study. *Contrib Mineral Petrol* 98:129–138
- Pearce JA (2008) Geochemical fingerprinting of oceanic basalts with applications to ophiolite classification and the search for Archean oceanic crust. *Lithos* 100:14–48
- Pearce JA, Ernst RE, Peate DW, Rogers C (2021) LIP printing: use of immobile element proxies to characterize Large Igneous Provinces in the geologic record. *Lithos* 392–393:106068
- Shervais JW (2022) The petrogenesis of modern and ophiolitic lavas reconsidered: Ti–V and Nb–Th. *Geosci Front* 13:101319
- Wood DA (1980) The application of a Th–Hf–Ta diagram to problems of tectonomagmatic classification and to establishing the nature of crustal contamination of basaltic lavas of the British Tertiary volcanic province. *Earth Planet Sci Lett* 50:11–30

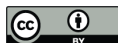

# Petrogenesis and geodynamic implications of Ediacaran rocks from the Sirwa massif (Central Anti-Atlas); insights from U-Pb geochronology, whole-rock geochemistry, and Sm-Nd isotopes

Abdelhay Ben-Tami<sup>1,2</sup>, Said Belkacim<sup>1,6</sup>, Jamal El Kabouri<sup>1</sup>, Bouchra Baidada<sup>3</sup>, Joshua H.F.L. Davies<sup>4</sup>,  
Morgann G. Perrot<sup>5</sup>, Mohamed Bhilisse<sup>2</sup>, Mohamed Assalmi<sup>2</sup>, Mariam Ferrag<sup>1,6</sup>, Mohamed  
Bouabdellah<sup>7,8</sup>, David Lalonde<sup>2</sup>.

<sup>1</sup> Laboratoire de Géologie Appliquée et Géo-Environnement, Département de la Géologie, Faculté des Sciences, Université Ibn Zohr, B.P.8106, Agadir, Maroc.

<sup>2</sup> Zgounder Millennium Silver Mining, Aya Gold and Silver Group, Rue De L'epargne, Quartier Racine, Casablanca, Maroc.

<sup>3</sup> Higher school of Technology, Fkih Ben Salah, Beni Mellal, Morocco.

<sup>4</sup> Department of Earth and Atmosphere Sciences, University of Quebec in Montreal, Montreal, QC H3C 3P8, Canada.

<sup>5</sup> Department of Earth and Planetary Sciences, McGill University, Montreal, Quebec H3A 0E8, Canada.

<sup>6</sup> Mining and Environmental Research Institute, University of Quebec in Abitibi-Timiskaming, Rouyn-Noranda, QC J9X 5E4, Canada.

<sup>7</sup> Laboratoire des Gîtes Minéraux, Hydrogéologie et Environnement, Faculté des Sciences, Université Mohammed Premier, 60000, Oujda, Maroc.

<sup>8</sup> Geology and Sustainable Mining Institute, Mohammed VI Polytechnic University, Benguerir 43150, Morocco.

Correspondence to: Abdelhay Ben-Tami (abdelhaybentami@gmail.com)

## Abstract.

The geodynamic evolution of the Anti-Atlas belt post-Pan-African orogeny (~650 Ma) remains debated, particularly regarding the basement beneath the Central Anti-Atlas, and the geological processes leading to the formation of the Ediacaran Sagro Group (SG), and Ouarzazate Group (OG). New LA-ICP-MS U-Pb ages of  $575 \pm 3$  Ma and  $564 \pm 2$  Ma were obtained respectively from samples Zg-106, and Zg-119 from the OG. In addition, detrital zircons from SG sediments yield a prominent 2.1 Ga age peak, indicating local recycling of Paleoproterozoic basement material. Geochemically, two magmatic series are identified: (i) a SG mafic-intermediate calc-alkaline series with Nb-Ta and Ti negative anomalies from early back-arc basin setting; and (ii) a felsic-intermediate high-K calc-alkaline to shoshonitic series of the OG, exhibiting continental magmatic arc signatures. Isotope data ( $\epsilon_{\text{Nd}}(t)$ : +3.2 to +4.5, TDM = 1431 - 1197 Ma for SG;  $\epsilon_{\text{Nd}}(t)$ : -0.9 to +1.1, TDM = 1526– 1252 Ma for OG), indicates that the SG formed from a dominantly juvenile, mantle-derived source, with limited crustal contribution; while the slightly younger OG involved significant reworking of older, evolved continental crustal material. These findings sustain a model where Early Ediacaran SG sediments and associated mafic-intermediate volcanics were formed in a back-arc basin. During this basin development, its shoulders were locally formed by the 2.1 Ga Paleoproterozoic basement, supplying Paleoproterozoic zircons to the Sagro host basin. This, further supports the occurrence of the Eburnian basement north of the Anti-Atlas Major Fault (AAMF). Additionally, the younger OG reflects a Late Ediacaran continental crust collapse event involving widespread crustal reworking and the emplacement of a Silicic Large Igneous Province (SLIP).

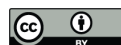

## 35 Keywords

Saghro Group; Ouarzazate Group; Sirwa massif; LA-ICP-MS U-Pb on zircon; 2.1 Ga Paleoproterozoic crust

## 1 Introduction

The Anti-Atlas belt of Morocco in the northern margin of the West African Craton (WAC) bears witness to a long-lived geological evolution ~~started~~ since the break-up of Rodinia. The Tonian ~~→~~ Cryogenian evolution of this belt record the establishment of a passive margin, and island arc which were accreted to the WAC margin at ca. 650 Ma, with the emplacement of syn-tectonic granitoids (Linnemann et al., 2019, 2014; Pereira et al., 2012a; Abati et al., 2010; Liégeois et al., 2006; Gasquet et al., 2005). The subsequent evolution of the Anti-Atlas belt during the Ediacaran is still debated despite the improvements in the understanding of the multiple events that prevailed during Neoproterozoic times (D’Lemos et al. 2006; Samson et al. 2004; Gasquet et al. 2008, 2005, 2004; Thomas et al. 2004, 2002; Ennih and Liégeois, 2008, 2001; Walsh et al. 2002), and led to the final amalgamation of Gondwana (D’Lemos et al., 2006; Gasquet et al., 2008, 2005). Within this time frame, and based on paleogeographic reconstruction and lithostratigraphic correlations, the Anti-Atlas belt was close to the Cadomian subduction system. In liaison, this subduction is responsible for the accretion of peri-Gondwana terranes and the final amalgamation of the Gondwana (El Kabouri et al., 2025; Rojo-Pérez et al., 2024; Stern, 2024; Garfunkel, 2015; Hefferan et al., 2014). However, it is still debated whether the Anti-Atlas records the post-collisional phase of the Pan-African belt, or if it is related to the establishment of a back-arc basin induced by the southward-dipping Cadomian subduction beneath the amalgamated WAC-Iriri/Tazigzaout arc complex at ca. 620 Ma (Errami et al., 2021a; Walsh et al., 2012; El Hadi et al., 2010; Abati et al., 2010). Furthermore, the nature of the basement north of the Anti-Atlas Pan-African suture zone, known as the Anti-Atlas Major Fault, is also still a matter of debate. However, in the Zgounder Mine Region, a well-preserved section of Ediacaran sedimentation and magmatism provides key insights into the final stages of Pan-African tectono-magmatic evolution along the northern margin of the WAC.

The study area, so-called the “Zgounder Mine Region” in this contribution corresponds to the vicinity of the Zgounder Ag-Hg deposit (Ben-Tami et al., 2024). The Zgounder deposit is situated at approximately 265 km east of Agadir, and 220 km west of Ouarzazate, along the southern flank of the Ouzellagh-Sirwa Salient in the Central Anti-Atlas Mountains of the WAC. The Ediacaran period of the Zgounder Mine Region (630-539 Ma), is represented by: (i) the Saghro Group (SG) sedimentary successions and coeval mafic to intermediate units deposited at around 630 to 600 Ma (Abati et al., 2010); (ii) large felsic plutons, subvolcanic formations, along with coeval pyroclastic rocks referred to as the Ouarzazate Group (600 Ma - 539 Ma (Thomas et al., 2002).

We present new whole-rock geochemistry, and Sm-Nd isotopes for the Ediacaran successions of the Zgounder Mine Region. The aims are to decipher their petrogenesis, explore magma sources, and investigate their geodynamic significance in Ediacaran evolution of the WAC. We also report new LA-ICP-MS U-Pb dating on magmatic and detrital zircons to constrain

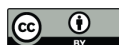

the lower Ediacaran magmatism and challenge the source of the Saghro Group's sedimentary units, hence, refining existing geodynamic models.

## 2 Geological setting

### 2.1 The Anti-Atlas belt

70 The Anti-Atlas Mountains, located on the northern edge of the WAC, and consist of a Proterozoic basement and a Late Ediacaran to Paleozoic cover (Leblanc and Lancelot, 1980) (Fig. 1B). These mountains record two major orogenic cycles: the Paleoproterozoic Eburnean and the Neoproterozoic Pan-African orogenies.

The Paleoproterozoic Eburnean orogeny is preserved in the Western Anti-Atlas, where low- to high-grade metamorphic rocks are intruded by a series of granitoids dated at ~2.2 Ga (Hefferan et al., 2014, and references therein; O'Connor et al., 2010; El Hadi et al., 2010; Ennih and Liégeois, 2008; Gasquet et al., 2008, 2005; Thomas et al., 2002; Walsh et al., 2002; Ait Malek et al., 1998). Overlying these terranes, is the carbonate and quartzite succession of the Taghdout Group deposited in a passive margin (Errami et al., 2021a; Álvaro et al., 2014; Abati et al., 2010; Thomas et al., 2004). U-Pb ages on a quartzite sample from the Taghdout Group provided ages spanning from 2182 to 1987 Ma (Walsh et al., 2012). Moreover, undeformed Doleritic dikes intrude the Taghdout Group in the Ighrem and Zenaga inliers, and were dated between 1710 and 1630 Ma by Ikenne et al., (2017), and Ait Lahna et al., (2020), respectively. Overall, this implies that the Taghdout Group is in fact of Paleoproterozoic in age (Ikenne et al., 2017; Abati et al., 2010).

The Neoproterozoic episode known as the Pan-African orogeny is well established in the Central and Eastern Anti-Atlas (ca. 760 to 550 Ma) in numerous studies (Bouougri et al., 2020; Soulaïmani et al., 2018; Triantafyllou et al., 2016; Karaoui et al., 2015; Blein et al., 2014; Álvaro et al., 2014; Hefferan et al., 2014; Walsh et al., 2012; El Hadi et al., 2010; Errami et al., 2009; Michard et al., 2008; Gasquet et al., 2008, 2005; Ennih and Liégeois 2008, 2001; Thomas et al., 2004, 2002). These Pan-African successions start with an early Tonian–Cryogenian syn-rift units, consisting of carbonates and quartzites known as the Jbel Lkst Group (Kerdous inlier), the Tachdamt Group (Zenaga inlier), and the Bleida quartzites (Bou-Azzer-El Graara inlier) (Álvaro et al., 2014). The rifting process is evidenced by the formation of oceanic basement now preserved as ophiolitic sequences in the Bou-Azzer and Sirwa inliers (Thomas et al., 2002, 2004). Concurrently, a long-lived island arc complex formed north of the WAC (Admou et al., 2012; D'Lemos et al., 2006; Thomas et al., 2002, 2004). This arc is now preserved as the  $743 \pm 14$  Ma Iriri Arc in the Sirwa inlier (Thomas et al., 2002), and its equivalent, the Tazigzaout-Bougmane Complex in the Bou-Azzer inlier, dated at  $752 \pm 1_2$  Ma (D'Lemos et al., 2006). Following this, and as the north dipping subduction ceased, these latter terranes were subsequently deformed and obducted to the northern margin of the WAC around 650 Ma during the main Pan-African orogeny (Hefferan et al., 2014, and references therein; Thomas et al., 2002). Further, widespread calc-alkaline magmatic intrusions and regional metamorphism affected the Anti-Atlas belt (Hefferan et al., 2014, and references therein), with several syn-orogenic granitoids dated between 680 and 640 Ma (Hefferan et al., 2012; Walsh et al., 2012; El Hadi et al., 2010; Inglis et al., 2005; Thomas et al., 2002).



In the northeastern domain of the Anti-Atlas, the Ediacaran stratigraphy (630 – 539 Ma) comprises an early Ediacaran basement of Saghro Group, consisting of folded meta-sedimentary units under greenschist facies conditions, and covered by a late-Ediacaran Ouarzazate Group sequence of volcanic and volcano-sedimentary nature (Ouabid and Garrido, 2023; Errami et al., 2021a; Yajoui et al., 2020; Michard et al., 2017; Blein et al., 2014; Álvaro et al., 2014, 2014b; Walsh et al., 2012; Abati et al., 2010; Errami et al., 2009; Gasquet et al., 2008; Liégeois et al., 2006; Thomas et al., 2002; Fekkak et al., 2001; Bajja, 2001; Ouguir et al., 1996). The transition from volcanic dominated successions of the Ouarzazate Group to the establishment of a stable platform series is recorded during the Ediacaran–Cambrian transition, with the deposition of the Taroudante and Tata groups in an anorogenic setting (Álvaro et al., 2014).

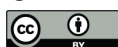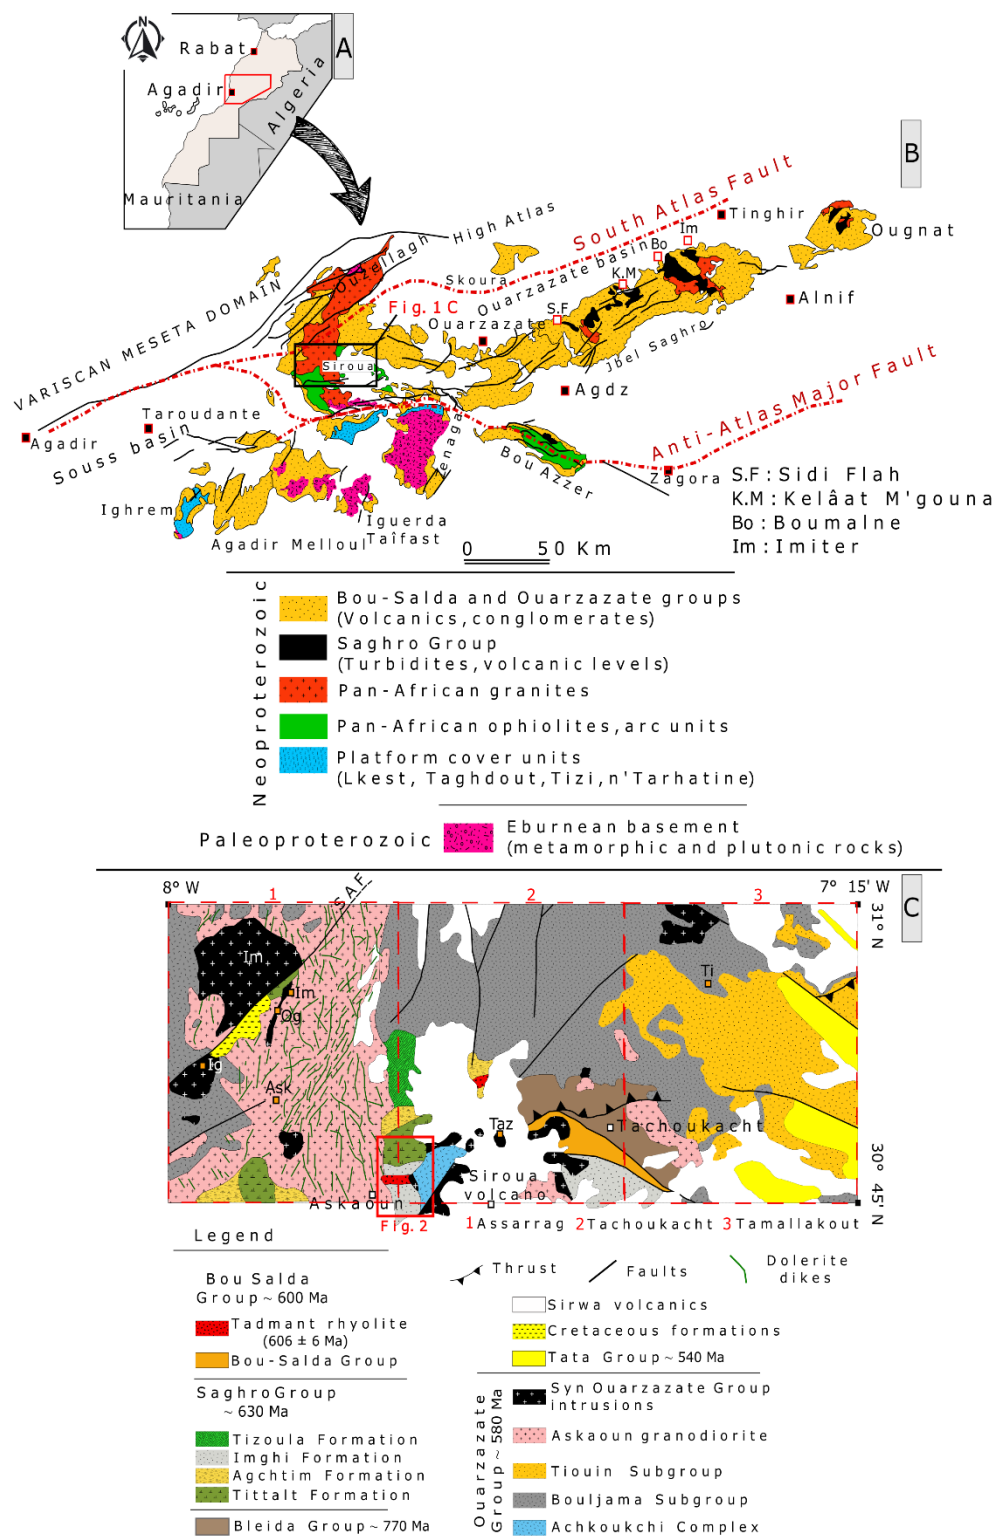



**Figure 1:** (A) Sketch map locating the Anti-Atlas belt in respect to Morocco (Saadi, 1985). (B): geological map of the Central and Eastern Anti-Atlas Proterozoic inliers (redrawn and modified after Michard et al., (2017)). (C): Schematic representation of the geology of the Sirwa massif (compiled and redrawn after Thomas et al., (2002)); location of the Zgounder Mine Region in red square (see Fig. 2). Abbreviations: Taz : Tazoult quartz-porphyry ( $559 \pm 6$  Ma); Im: Imourkhsen granite ( $562 \pm 5$  Ma); Ti: Tikhfist rhyolite ( $571 \pm 8$  Ma); Ask: Askaoun granodiorite ( $575 \pm 8$  Ma); Ig: Ighrem granite; Og: Ougougane granite; and SAF: South Atlas Fault. U-Pb ages are from Thomas et al., (2002).

## 2.2 Sirwa inlier

The recent geological mapping of 1/50 000 scale sheet maps of Douar Çour, Assarrag, Tachoukacht, Tamallakout, Sirwa, Taghdout, and Aq̄dif (see Fig. 1C for relevant sheets) has subdivided the Sirwa inlier into various groups (Thomas et al., 2000a; De Beer et al., 2000; Gresse et al., 2000).

Paleoproterozoic rocks are the oldest in the Sirwa inlier, mainly composed of altered iron-rich gneiss and schist fragments from the Zenaga Complex (Thomas et al., 2002). The Tachdamt Group's sedimentary and volcanic rocks were deposited after Rodinia's breakup (Thomas et al., 2002). Interbedded Tachdamt Group volcanoclastic deposits date to ca. 883 Ma (Bouougri et al., 2020). This Group is overlain by the Khzama Complex, which includes the Tasriwine ophiolite, the Iriri Migmatite, and Tachoukacht schists formed during island arc development and associated back-arc oceanic crust (Thomas et al., 2002).

The Saghro Group, as defined by Thomas et al., (2002), is a thick, ~8000 m pile of deformed sedimentary, volcanoclastic, and volcanic rocks with a calc-alkaline composition and greenschist-facies metamorphism. It includes six lithostratigraphic formations: Tittalt, Agchtim, Tizoula, Imghi, Azarwas, and Tafiāt. The lower sequence features greywacke/turbidites with volcanic rocks, while the upper formations consist of coarse-grained clastic rocks (Thomas et al., 2002). The age of the Saghro Group has been constrained by Liégeois et al., (2006) and Abati et al., (2010) using U-Pb dating on detrital zircons from both the Sirwa and Saghro massifs. These studies established a maximum depositional age at approximately 610 Ma. More recent data from the Eastern Saghro massif reported by Errami et al., (2021a), provided slightly younger detrital ages clustering around  $607 \pm 6$  Ma and  $604 \pm 5$  Ma. In addition, the entire Saghro series was intruded by syn-tectonic granitoids dated at  $603 \pm 6$  Ma and  $600 \pm 3$  Ma (Errami et al., 2021a). Crucially, in the Sirwa inlier, the Saghro Group is significantly older as it is intruded by the Mzil granite dated at 614 Ma (Thomas et al., 2002, 2004).

The Bou Salda Group is a thick volcano-sedimentary succession from 610 to 580 Ma (Belkacim et al., 2017; Gasquet et al., 2008), interpreted as basin infills of grabens and pull-apart basins within the AAMF (Errami et al., 2021a; Gasquet et al., 2008; Thomas et al., 2002). In the Sirwa inlier, it mainly comprises the Lmakhzene and Ighil members (Thomas et al., 2002). The Lmakhzene Member features arkosic gritstones, sandstones, and conglomerates, while the volcanic Ighil Member includes basalt, rhyolite, and andesite. Ages for the Bou Salda Group in the Sirwa inlier are derived from the Tadmant and Tamriwine rhyolites, dated respectively at  $606 \pm 6$  Ma and  $605 \pm 9$  Ma (Thomas et al., 2002) (Fig. 1C, and Fig. 2). Pelleter et al. (2016), also dated the Tadmant rhyolite at  $610 \pm 7$  Ma (Fig. 2). Nonetheless, Abati et al., (2010) reported detrital zircon ages of  $600 \pm 12$ ,  $603 \pm 13$ , and  $625 \pm 12$  Ma, suggesting a maximum age for quartzite clasts in a conglomerate and, hence for the Bou Salda Group.





The Ouarzazate Group sequences (580-539 Ma; Blein et al., 2014b; Toummite et al., 2013; Thomas et al., 2004) of immature, coarse clastic sedimentary rocks (conglomerates, arkoses, reworked volcanic rocks) acid to intermediate volcanoclastic rocks (lapilli tuff, volcanic breccias, ignimbrites, etc.) and lavas (minor basalt, andesite and rhyolite) are associated with post-collisional high-K calc-alkaline to shoshonitic magmatism (Soulaimani et al., 2018). Briefly, throughout the Sirwa inlier, the

145 Ouarzazate Group is subdivided into four subgroups (Fig. 1C for relevant groups) (Tiouin, Bouljama, Tafrant and Achkouchi) (Thomas et al., 2000a; Gresse et al., 2000; De Beer et al., 2000). Under an extensional regime, typical foreland basin successions of Tata Group were deposited, following the post-orogenic molasse volcanoclastic rocks of the Ouarzazate Group (Thomas et al., 2002) (Fig. 1C).

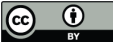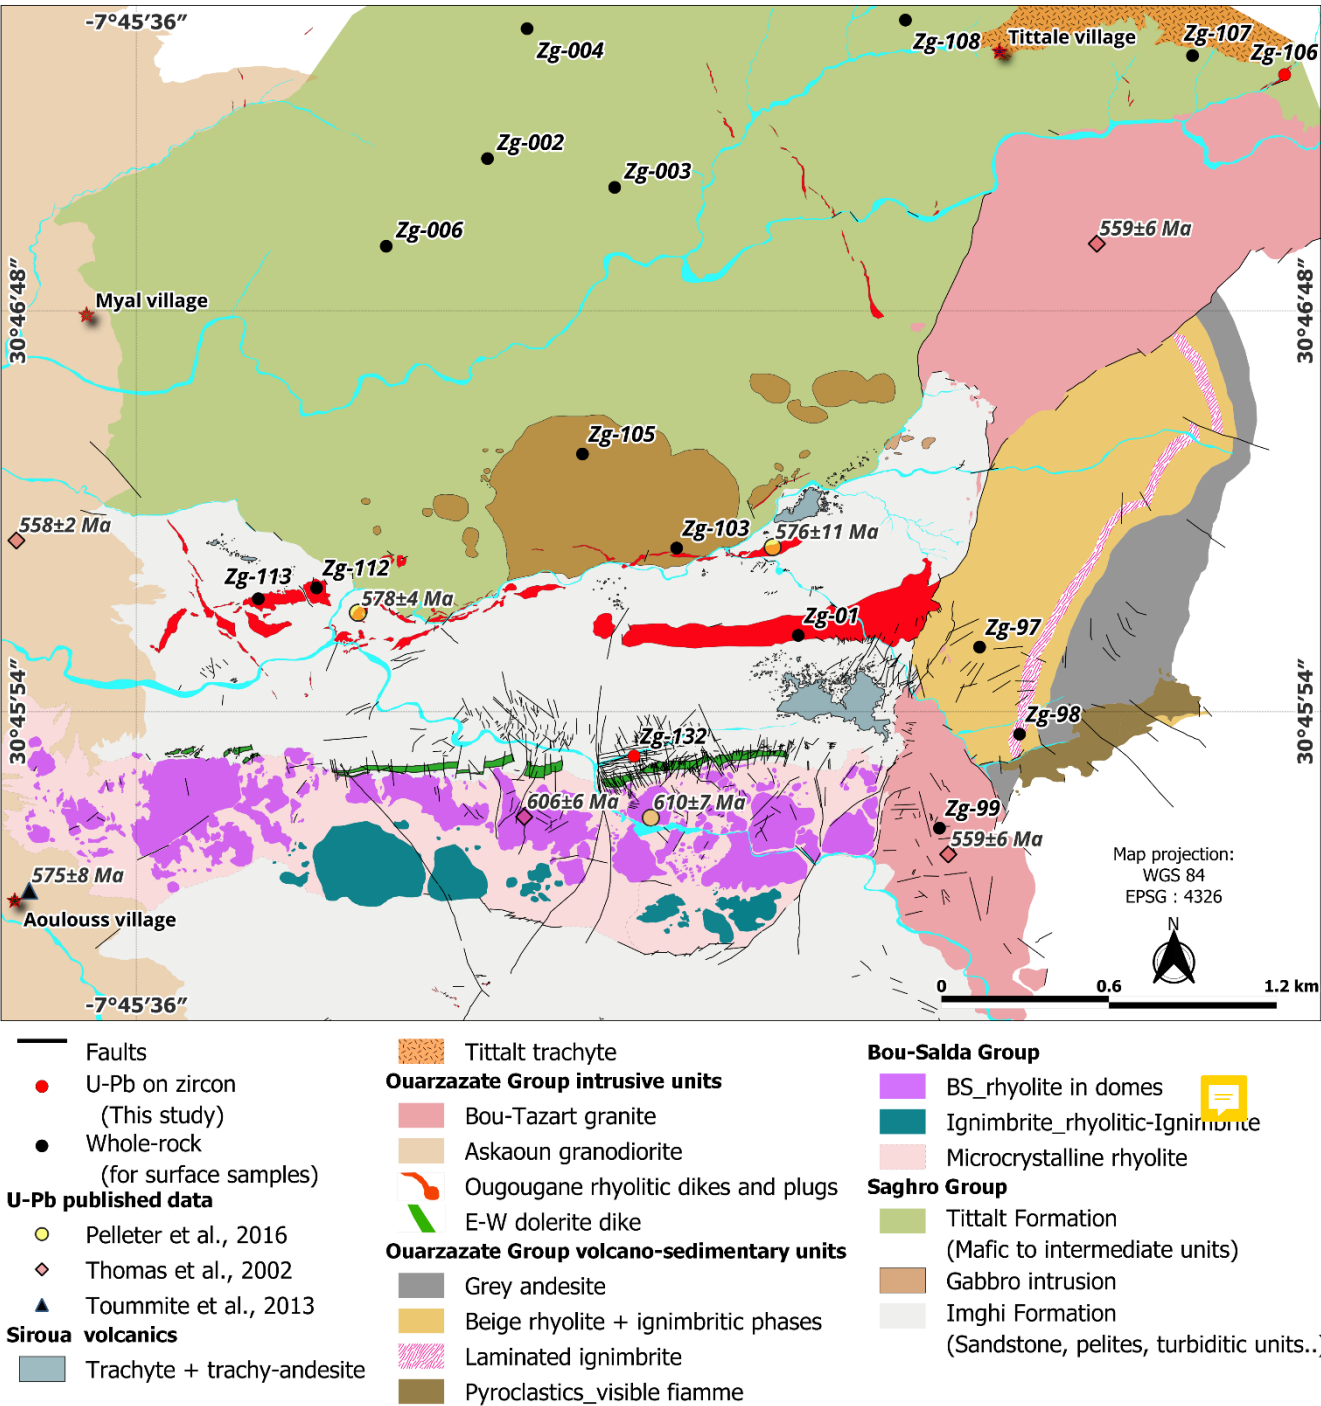

150 **Figure 2: Detailed geological map of the Zgounder Mine Region (this study). Locations of surface samples are indicated on the map. Underground samples (e.g. Mine levels, drill holes) including the dated Zg-119 are not represented on the map.**



### 3 Data and methodology

#### 3.1 U-Pb zircon geochronology

Three samples from the Zgounder Mine Region (Zg-106; Zg-119; Zg-132) were selected for U-Pb zircon geochronology (see Fig. 2 for location: Zg-106, and Zg-132). They were crushed, sieved to 50-250  $\mu\text{m}$ , and weighed (1.4 kg for Zg-106; 1.5 kg for Zg-119; 2.3 kg for Zg-132), at the preparation unit of the Département de Géologie, Faculté des Sciences, Université Ibn Zohr, Maroc. Samples were then shipped to the Geotop Research Center, Université de Québec à Montréal (UQAM), Canada. Analytical parameters are detailed in supplementary data 1, following Horstwood et al. (2016) (refer to table 1 in supplementary data 1). Ages of intrusive rocks are reported as weighted mean  $^{206}\text{Pb}/^{238}\text{U}$  dates, and detrital zircon data as concordia dates. LA-ICP-MS U-Pb data are in supplementary table 5.

#### 3.2 Whole-rock geochemistry and Sm-Nd isotopes

Fresh rock samples were collected for whole-rock geochemistry and Sm-Nd isotopes from outcrops (surface and underground), as well in various diamond drill holes from the Zgounder Mine Region. Crushing and powdering of the rock samples were performed at the facilities of the Zgounder Millennium Silver Mining Company (ZMSM). For each sample, lithostratigraphic position, sample type, drill core name and depth, short description and analytical methods applied are reported in supplementary table 3. Further details on the analytical procedures are given as supplementary data 2.

### 4 Results

#### 4.1 Petrography

##### 4.1.1 The Saghro Group rocks

- The Saghro Group is mainly represented by fine to medium-grained, and dark to olive green mafic volcanic rocks. They contain fine-grained plagioclase and clinopyroxene phenocrysts dispersed in the groundmass (Fig. 3). A medium- to coarse-grained equigranular and dark green gabbroic facies is also present, and shows heavily altered pyroxenes and amphiboles (Fig. 3a). Dolerite sample (Fig. 3b) have an intergranular texture, with lath shaped plagioclase, primary Fe-Ti oxides, and clinopyroxene aggregates. Sample Zg-108 is andesitic in composition (Fig. 3c), and shows a medium-grained intergranular texture. The texture is microlitic to microlitic-porphyritic for basalt and basaltic-andesite samples (Fig. 3d).
- The dated sandstone sample (Zg-132), displays distinct well-defined, millimeter-scale laminations, controlled by compositional variations. Darker bands are enriched in chlorite, whereas lighter laminae are mainly composed of quartz and muscovite (Fig. 3e). Such alternating patterns suggest fluctuating depositional conditions, specifically changes in hydrodynamic energy and the amount of clay input, consistent with a low-energy, suspension-dominated sedimentation typical of distal turbidites or quiet shallow-marine environment.



#### 4.1.2 The Ouazazate Group rocks

- 185
190

Rhyolite samples show a microcrystalline locally glassy texture. Primary mineral assemblages are composed of quartz megacrysts and, K-feldspar altered to albite, and embedded in a devitrified matrix. Secondary alteration minerals are sericite, albite, with some local carbonate veinlets (Fig. 3f). Dolerite samples (Zg-13, Zg-15; Fig. 3g) are fine-grained, exhibiting an intergranular texture. Plagioclase crystals, locally transformed to albite are moderately sericitized and rarely altered to epidote, with equant opaque grains enclosed in the primary minerals (plagioclase, pyroxene). A dolerite sample (Zg-14) collected next to the mineralized zone have an intergranular texture in which laths of black oxidized plagioclase were included in pyroxene crystals (Fig. 3h). The plagioclase crystals are strongly altered and replaced by a mixture of blue chlorite, weak and sparse grains of epidote. Clinopyroxene is mainly replaced by hornblende and actinolite, and partially by pyrite. Ignimbrite samples show an eutaxitic texture with remarkable fiamme and dense welded volcanic glass, along with cryptocrystalline facies locally fluidal, mainly composed of quartz, opaque minerals, sericitized phenocrysts of plagioclase and K-feldspars (Fig. 3i).
- 195

Granodiorite and quartz-diorite samples are grey to light brown with a moderate pinkish tint related to K-feldspar alteration, and they show a homogenous coarse-grained texture. Sericite and clay minerals replace lath-shaped plagioclase phenocrysts, and are associated with chlorite and iron oxides (Fig. 3g). Chlorite replaces biotite, which locally substitutes hornblende crystals. Opaque minerals are enclosed in hornblende, biotite and plagioclase. Granite is medium- to locally fine-grained; it is distinguished from the granodiorite and quartz-diorite by its white to pink color (Fig. 3k).

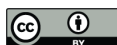

| Lithology                     | Sample code | Texture                                                    | Primary minerals and accessory phases (size + %)                                                                                                                                                           | Alteration minerals                                                                                                         |
|-------------------------------|-------------|------------------------------------------------------------|------------------------------------------------------------------------------------------------------------------------------------------------------------------------------------------------------------|-----------------------------------------------------------------------------------------------------------------------------|
| <b>Sagyro Group rocks</b>     |             |                                                            |                                                                                                                                                                                                            |                                                                                                                             |
| Gabbro                        | Zg-103      | medium to coarse-grained/<br>locally equigranular          | Olivine (<0,1mm; <2%); Pyroxene (up to 0,25mm; less than 5%); hornblende;(5-13%); Ca-rich plagioclase (20-35%); Fe-Ti oxides (up to 9%); accessory sulfides (pyrite); <2%)                                 | Secondary Amphibole; Green Chlorite as patches (10%); Sericite (up to 15%); epidote (2%)                                    |
|                               | Zg-105      |                                                            |                                                                                                                                                                                                            |                                                                                                                             |
| Dolerite                      | Zg-107      | intergranular                                              | Clinopyroxene, up to 0,5mm; up to 15%); Plagioclase (20-35%); primary Fe-Ti oxides (up to 12%).                                                                                                            | Chlorite; minor epidote; rare albite; minor sericite (green schist alteration package)/ secondary amphibole,                |
| Andesite                      | Zg-108      | Medium-grained intergranular                               | Primary Fe-Ti oxides (up to 10%); Pyroxene (up to 0,2mm; less than 5%); Plagioclase (up to 35%)                                                                                                            | Minor sericite, oxides.                                                                                                     |
| Basaltic-andesite             | Zg-002      | Microlitic-porphyrific                                     | Clinopyroxenes as fine aggregates (0,1mm; up to 10%); Automorphic plagioclase as micro and phenocrysts locally zoned (0,4 - up 1,4 mm; up to 40%); Opaque minerals (<5%)                                   | Chlorite (micro-patches); Sericite (13%); Argillic alteration, minor kaolinite in plagioclase, oxides altering plagioclase. |
|                               | Zg-003      |                                                            | Micro and local phenocrysts of Pyroxene (0,1 – up to 1 mm; up to 13%); Plagioclase as micro and phenocrysts locally zoned (0,4 - up to 1,4 mm; 35%); oxides altering plagioclase phenocrysts; rare apatite | Chlorite; dispersed calcite (up to 5%), oxide orioles surrounding pyroxenes; Sericite (14%);                                |
|                               | Zg-004      |                                                            |                                                                                                                                                                                                            |                                                                                                                             |
| Basalt                        | Zg-006      | Microlitic-porphyrific                                     | Pyroxene (0,1 - 0,8 mm; less than 10%); Micro plagioclase in the mesostasis + phenocrysts (0,2-1,5mm; 30-38%); Fe-Ti oxides.                                                                               | Abundant calcite, secondary quartz (amygdales); Sericite.                                                                   |
| Sandstone                     | Zg-132      | Fine to medium-grained                                     | Compositional variation for darker/lighter laminations: Quartz (0,2-0,4mm; up to 70%); muscovite flakes (10 to 30 %); chlorite (10 to 25 % or more); feldspar (up to 0,3mm); iron oxides (7%).             |                                                                                                                             |
| <b>Ouarzazate Group rocks</b> |             |                                                            |                                                                                                                                                                                                            |                                                                                                                             |
| Rhyolite                      | Zg-04       | Cryptocrystal line, locally glassy with visible fiamme     | Quartz (0, 2-0,4mm; up to 30%); Plagioclase (0, 15-0,6mm; 20-30%); K-feldspar (0, 15-0,8mm; up to 55%); Biotite (~0,1mm; less than 4%); Primary opaque minerals; Zircon (<1%) + xenoliths (1-2mm; 6%)      | Slight albitization; Chlorite/muscovite (micro-patches); Sericite;                                                          |
|                               | Zg-06       |                                                            |                                                                                                                                                                                                            |                                                                                                                             |
|                               | Zg-117      |                                                            |                                                                                                                                                                                                            |                                                                                                                             |
| Rhyolitic-ignimbrite          | Zg-05       | vitroclastic to cryptocrystalline texture, locally fluidal | Quartz (0,1-1,8 mm; up to 30%); Plagioclase (up to 2,2mm); K-feldspar (0,8-1,9mm); Fe-Ti oxides (less than 4%); + xenoliths (meta-sedimentary facies)                                                      | Sericite (4-8%)                                                                                                             |
|                               | Zg-111      |                                                            |                                                                                                                                                                                                            |                                                                                                                             |
| Porphyritic rhyolite          | Zg-110      | porphyritic                                                | Quartz in phenocrysts (1-4,5mm; 18-28%); K-feldspar (up to 4,5 mm); Plagioclase (up to 4,3 mm); Opaque minerals (Less than 5%); + visible xenoliths (up to 2,6mm)                                          | Sericite (3-6%); Muscovite (1-2%)                                                                                           |
| Quartz-diorite                | Zg-07       | medium to coarse-grained                                   | Amphibole (0, 15-1mm; 2-8%) ; Biotite (0,25-2mm ; 4-9%) ; Plagioclase (1,3 – 3.4 mm; 32-60%); K-feldspar (up to 1,6m ; up to 8%) ;                                                                         | Chlorite (5-8%); Muscovite (3%); Epidote (<2%)                                                                              |

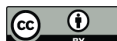

|                   |        |                                                            |                                                                                                                                                                                                                                                                                |                                                                                                                           |
|-------------------|--------|------------------------------------------------------------|--------------------------------------------------------------------------------------------------------------------------------------------------------------------------------------------------------------------------------------------------------------------------------|---------------------------------------------------------------------------------------------------------------------------|
|                   |        |                                                            | interstitial quartz (0.2 -1.2 mm; up to 25 %);<br>Primary opaque minerals (inclusion in amphibole<br>crystals; <6%); Zircon (<1%)                                                                                                                                              | Sericite (10-15%); Kaolinite and<br>Clay minerals (2%); Oxides (6%);                                                      |
| Granodiorite      | Zg-08  | medium to<br>coarse-<br>grained,<br>isogranular<br>texture | Hornblende (0,15-1,2mm ; 6-10%) ; minor Biotite<br>(0,25-2mm ; 4-18%) ; Plagioclase phenocrysts<br>(0.25 – 2.6 mm; 45-55%); Orthoclase (1-2,2m ;<br>20-35%) ; Quartz (0.4 -2.5 mm; 10-30 %) ;<br>+xenoliths ; Primary + secondary opaque<br>minerals ; Zircon in biotite (<1%) | Chlorite (less than 10%); Sericite (up<br>to 25%); Epidote (2%); Clay<br>minerals (2%); Kaolinite (<2%);<br>Oxides (4%)   |
|                   | Zg-09  |                                                            |                                                                                                                                                                                                                                                                                |                                                                                                                           |
| Dolerite          | Zg-13  | intergranular                                              | Clinopyroxene (augite) (0,1mm; up to 6%); brown<br>hornblende (up to 14%); automorphic plagioclase<br>(0,4 - less than 1,4 mm; up to 43%); Biotite<br>(<4%); secondary Quartz (0,1-0,4mm; <4%);<br>Primary opaque minerals (<5%); accessory<br>sulfides (pyrite); <2%)         | Intense Chlorite (patches); Sericite<br>(20%); Muscovite (up to 2%)                                                       |
|                   | Zg-15  |                                                            |                                                                                                                                                                                                                                                                                |                                                                                                                           |
| Diabase           | Zg-14  | intergranular                                              | Pyroxene (0,03-0,1mm; less than 10%);<br>Plagioclase (0,25-2,5mm; 35-40%); Fe-Ti oxides<br>(magnetite+ilmenite prisms, <6%)                                                                                                                                                    | Patches of blue chlorite (0,25-1,1<br>mm; up to 38%); sericite (up to 8%);<br>clay minerals (<6%); Secondary<br>amphibole |
| Ignimbrite        | Zg-97  | eutaxitic<br>texture with<br>visible<br>fiamme             | Quartz (less than 0,7mm; 45-60%); Plagioclase; K-<br>feldspar (sanidine; up to 23%, 0,4mm); Opaque<br>minerals (euhedral to subhedral) (5-10%); +<br>Xenoliths (anhedral); Zircon in inclusion in k-<br>feldspar crystals (<1%)                                                | Sericite (less than 5%); Scarce<br>chlorite (2%); Kaolinite (5%)                                                          |
|                   | Zg-98  |                                                            |                                                                                                                                                                                                                                                                                |                                                                                                                           |
| Granophyre        | Zg-99  | coarse<br>grained                                          | Amphibole; sub-automorphic Biotite (0,4-<br>0,9mm) ; Plagioclase (up to 8%; 0,5–1mm) ; K-<br>feldspar (microcline) ; Quartz (rounded and eye-<br>shaped (0,4-3,2mm)); Magnetite + apatite+ Zircon<br>(<2%) ( ; +xenoliths (mafic)                                              | Chlorite; Sericite ; Muscovite                                                                                            |
| Rhyolite          | Zg-106 | Microcrystalline,<br>locally<br>fluidal                    | Quartz (0,2-0,4mm) ; K-feldspar (up to 0,3mm);<br>Plagioclase (< 0,4mm); + rare xenoliths (mafic to<br>intermediate). Mesostasis forms more than 85% of<br>the rock.                                                                                                           | Albite; Chlorite (3-5%); Sericite (up<br>to 25%); Calcite (veinlets) (2%)                                                 |
| Granite           | Zg-115 | medium to<br>fine-grained,<br>equigranular                 | Amphibole (rare 2% (<0,2mm); Biotite (up to<br>2%); Microcline with visible twinning (20-30%<br>(0,5 to 1,2 mm)); Plagioclase (6-10% (=0,7mm));<br>Quartz (35-45% (0,4 to 1,3 mm)) ;<br>+metasedimentary xenoliths (0,5-1cm; 3%) ;<br>Opaque minerals; Zircon (<2%);           | Chlorite (moderate); Actinolite (less<br>amount); Sericite (15%); Muscovite<br>(less than 4%)                             |
|                   | Zg-119 |                                                            |                                                                                                                                                                                                                                                                                |                                                                                                                           |
| Rhyolite          | Zg-01  | microcrystalline<br>porphyritic<br>texture,                | Quartz phenocrysts (0,4-0,9mm); Plagioclase; K-<br>feldspar; rare biotite<br>Opaque minerals + rare xenoliths                                                                                                                                                                  | Muscovite rare micro-patches;<br>Sericite (up to 12%)                                                                     |
|                   | Zg-112 |                                                            |                                                                                                                                                                                                                                                                                |                                                                                                                           |
|                   | Zg-113 |                                                            |                                                                                                                                                                                                                                                                                |                                                                                                                           |
| Micro-<br>granite | Zg-02  | fine to<br>medium-<br>grained<br>texture                   | Amphibole (0,1-0,4mm; rare: less than 3%);<br>Biotite (<0,9mm; 2-4%); Quartz (0,4-3,2mm; less<br>than 40%); K-feldspar (up to 32%); Plagioclase (1-<br>2,9mm; up to 20%); Opaque minerals (<4%); +<br>xenoliths (up to 4,5mm)                                                  | Abundant Sericite (up to 10%);<br>chlorite (<3%); rare epidote (<1%)                                                      |
|                   | Zg-03  |                                                            |                                                                                                                                                                                                                                                                                |                                                                                                                           |
|                   | Zg-109 | fine grained<br>texture                                    | Amphibole (0,1-0,4mm; rare: less than 3%);<br>Biotite (<0,5mm; 2-4%); Quartz (0,4-0,9mm; less                                                                                                                                                                                  | Abundant Sericite (up to 10%);<br>chlorite (<3%); rare epidote (<1%)                                                      |



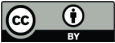

than 48%); K-feldspar (up to 30%); Plagioclase (0,5-1,4mm; up to 22%); Opaque minerals (<4%)

200 **Table 1: Mineralogical compositions of the studied rocks of the Saghro Group and Ouarzazate Group from the Sirwa massif (Zgounder Mine Region; 33 samples), refer to Fig. 2 for surface sample's locations.**

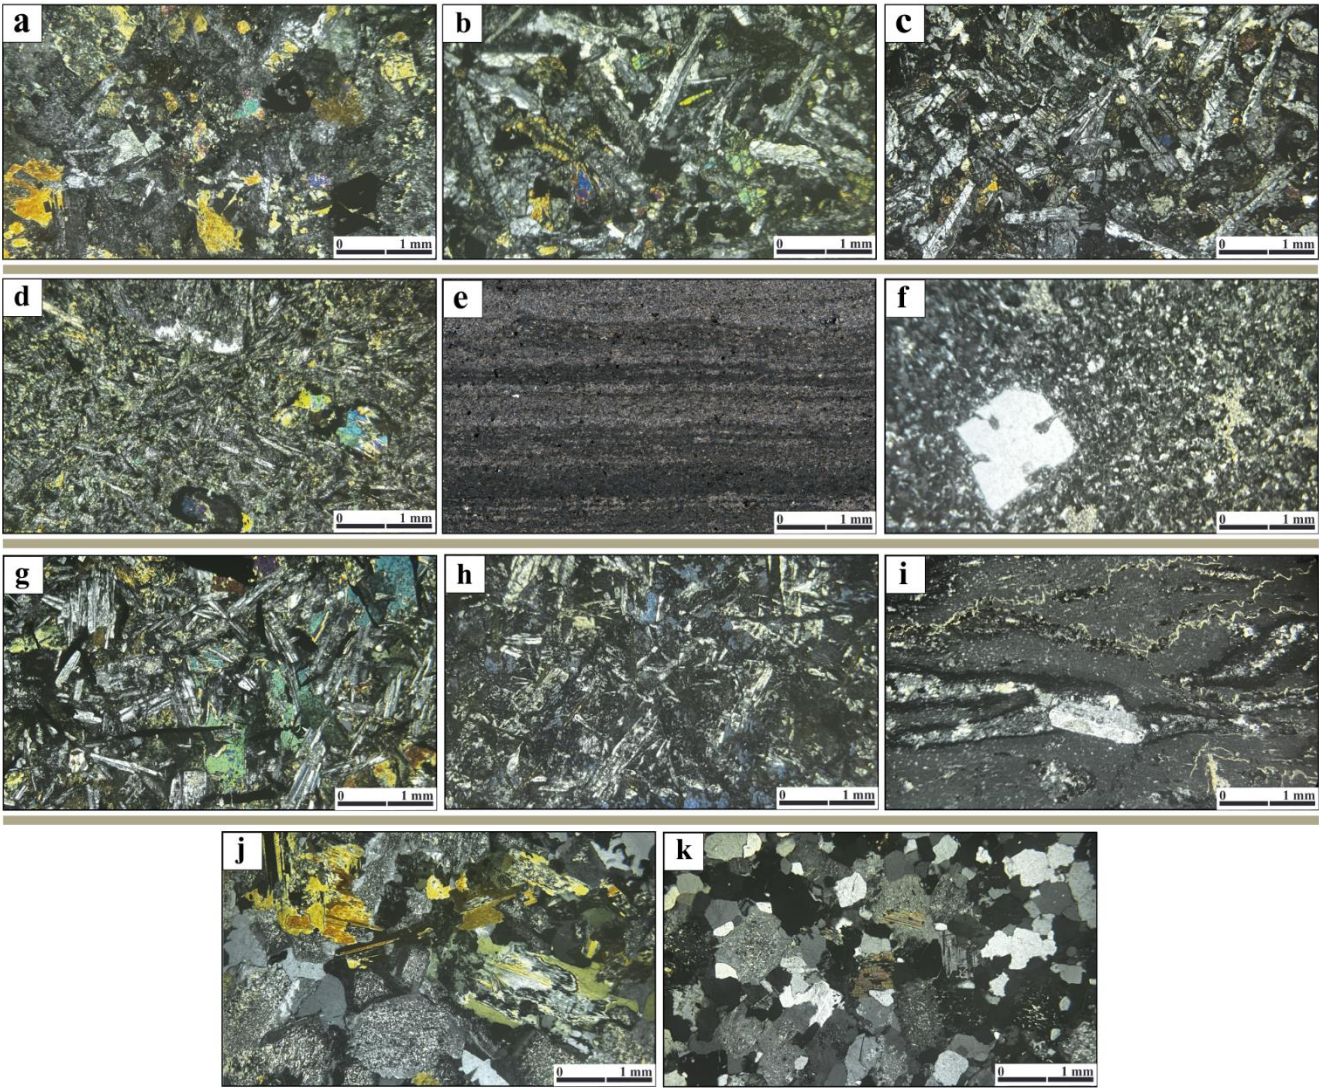

205 **Figure 3: Photomicrographs (all in cross-polarized light) of the studied Saghro Group and Ouarzazate Group rocks. (a) Gabbro sample showcasing a medium to coarse-grained locally equigranular texture. (b) An intergranular texture for dolerite. (c) Andesite with a medium-grained intergranular texture. (d) Microlitic-porphyritic texture for basaltic-andesite. (e) Sandstone (Zg-132) exhibiting millimetre-scale laminations showcasing darker bands enriched in chlorite, with quartz-muscovite lighter laminations. (f) Microcrystalline texture for rhyolite with embayed quartz phenocrysts. (g) Dolerite exhibiting an intergranular texture . (h) Diabase characterized by an intergranular texture with patches of blue chlorite. (i) Welded ignimbrite with an eutaxitic texture displaying flow textures with feldspars (sanidine) crystals embedded in a glassy fiamme. (j) Quartz diorite with subhedral to anhedral amphiboles and sericitized plagioclase. (k) Medium to locally fine-grained granite, with an anhedral to subhedral equigranular texture.**

210



## 4.2 Cathodoluminescence (CL) imaging and LA-ICP-MS U-Pb zircon geochronology

### 4.2.1 Tittalt rhyolite (Zg-106)

The rhyolite sample Zg-106 was taken from the Tittalt Formation as the lower unit that represents the Saghro Group in the Sirwa massif (Thomas et al., 2002, 2004). For context, this rhyolite is represented as a compact and homogenous body of approximately 46 m length, and 4 to 5 m thick. On the field, it corresponds to a rhyolitic dike crosscutting the mafic to intermediate units of the Tittalt Formation (Fig. 2). Admittedly, similar subvolcanic activity represented by E-W-trending rhyolitic dikes and related plugs was previously reported in the Zgounder Mine Region by Pelletier et al., (2016), and attributed to the Assarrag suite of Thomas et al., (2002). On the outcrop, it has a light pink to brownish taint with visible laminations. U-Th ratios range between 0.3 and 1. Most of the zircon crystals in this sample are euhedral and moderate in size. CL images reveal that zircon grains exhibit typical oscillatory zoning with rare and limited dark rim overgrowths (Fig. 4-1a), with no indication of inherited zircon grains. For filtering the data, only zircons with 95% to 105% concordance were used for age calculation (Fig. 4-1b). Thus, the weighted mean age for this sample gave  $575 \pm 3$  Ma (MSWD = 1.5;  $n = 21/40$ ), which is interpreted as the crystallization age (Fig. 4-1c).

### 4.2.2 Granite (Zg-119)

The sample Zg-119 was sampled from the diamond drill hole (DDH) ZG-20-21 (interval in meters: 555,30m –to- 568,50m), representing the Zgounder Mine exploration program from 2020, and referred to as the ‘Deep Intrusion’ (Mine terminology). On hand, the sample corresponds to a fine to medium-grained light grey granite with pink passes. Zircon grains from this sample are homogenous in size, mostly euhedral to subhedral with some rounded zircon grains. CL images show visible oscillatory zoning with local moderately fractured zircons showing dark overgrowths (Fig. 4-2a). The discordance filter used for this sample was the same as for Zg-106; thus, zircons falling outside 95% to 105% concordance were omitted from the age calculation. A total of high-quality zircon analyses yielded a reliable concordia age of  $564 \pm 2$  Ma (MSWD = 1.6;  $n = 34/37$ ). We also calculated a weighted mean age using a broader selection of concordant zircons within error, which gave an equivalent age of  $564 \pm 2$  Ma (MSWD = 1.1;  $n = 76/160$ ) (Fig. 4-2b). However, the zircon U-Pb are quite complicated and seem to spread over ~80 Ma which is likely due to the combined effects of Pb loss and inheritance (Fig. 4. 2-b). Hence both were omitted from the age calculation. We interpret the youngest tail of ages (~ 520 Ma) which are clearly outside of the main population reflecting analysis that have been affected by Pb loss (Sharman and Malkowski, 2024). Whilst oldest zircons are probably inherited (~ 620 Ma), and referring to a detrital signature. However, the analyzed detrital sample (Zg-132), that represents the sedimentary succession in which this granite is intruded has no zircons of this age (see supplementary table 5 for Zg-132). Moreover, the inheritance signature cannot be supported as no xenocrystic zircons were observed in the CL images. Overall, as both ages are statistically identical, we interpret the  $564 \pm 2$  Ma as the robust crystallization age for the granite (Fig. 4-2c).





#### 4.2.3 Sandstone (Zg-132)

This sample was collected from the Ag-Hg hosting sedimentary units from the Imghi Formation of Saghro Group near the Zgounder Mine entrance (Fig. 2). It is a fine to medium-grained greenish sandstone. On the outcrop, it follows the E-W-trending direction of the Imghi Formation, dipping at 70° to the south. For Thomas et al., (2002), the Imghi Formation represents the lower thick beds of greywacke/turbiditic section of Saghro Group, and seems to represent a typical flysch succession, which is interpreted as the primary sedimentary fill of a back-arc basin associated with the Khzama ophiolite complex. Most zircons from this sample are uniformly rounded and fragmented. They are distinguishable by their low CL signal with some being preferentially zoned (Fig. 4-3a). The age calculation utilized a filtered dataset, specifically incorporating only zircons that fell within the 95% to 105% concordance range. A total of 139 analyses were obtained on zircons from this sample, of which 91 are concordant (Fig. 4-3b). The ages distribution is dominated by one single population. For the detrital zircons, one uniform peak at around 2100 Ma, with one zircon recording an age at 3700 Ma (Fig. 4-3c).

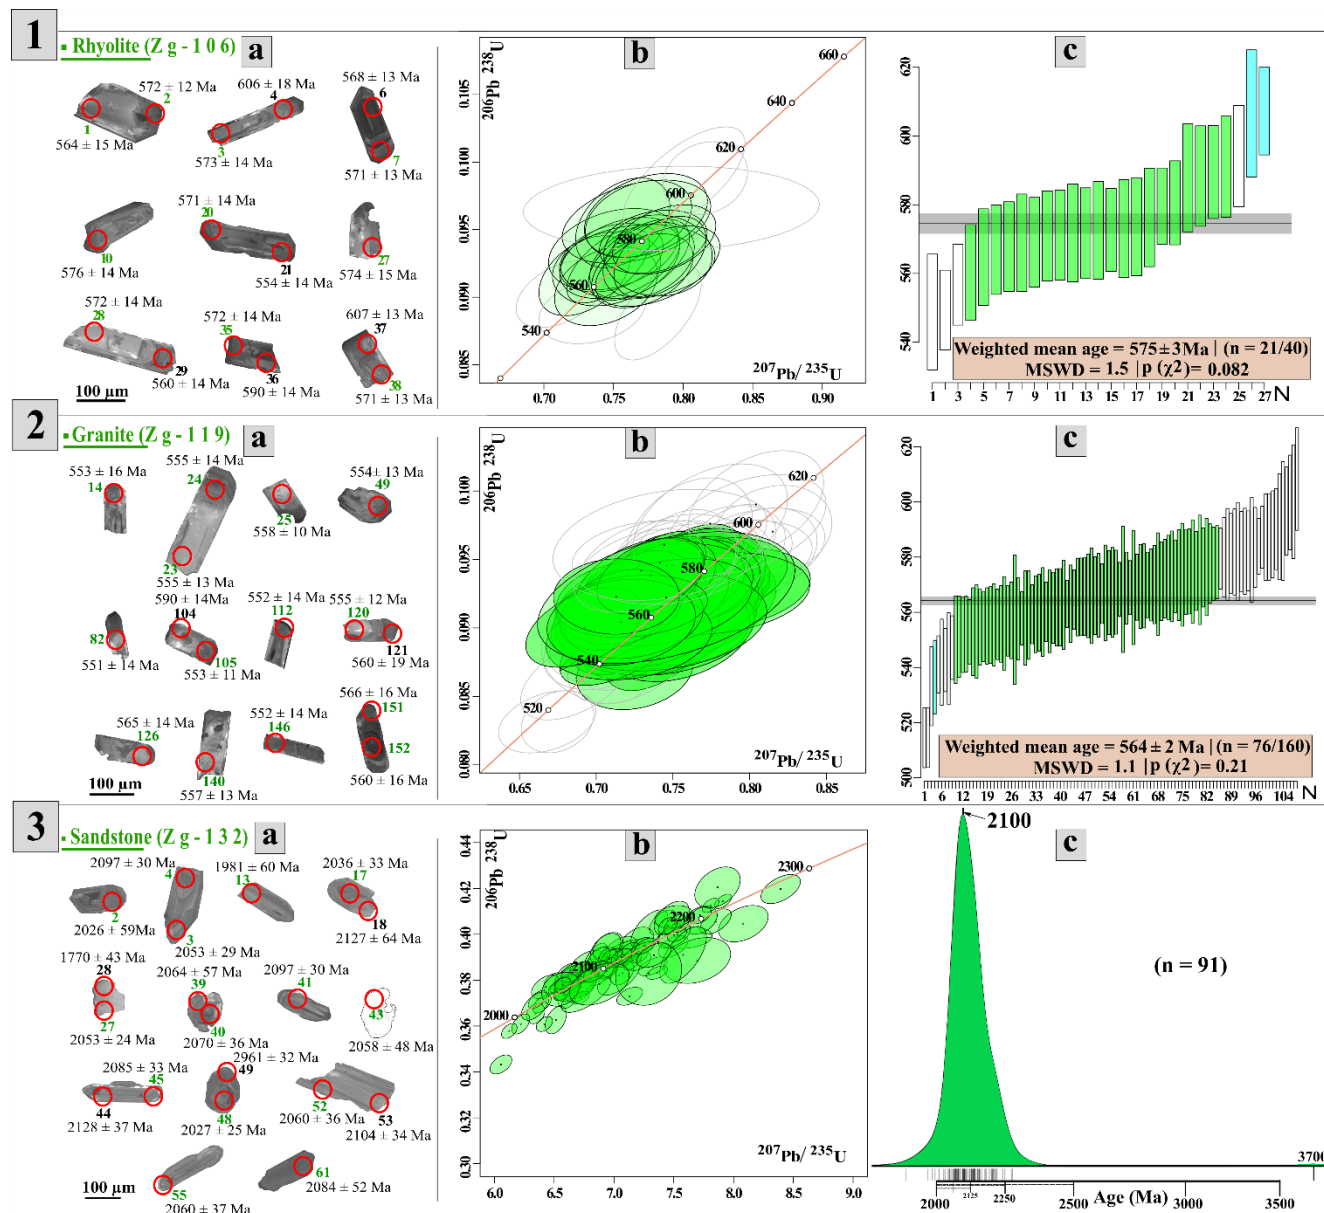

**Figure 4: Cathodoluminescence (CL) images for selected zircons, U-Pb concordia and  $\text{Pb}^{206} / \text{U}^{238}$  weighted mean diagrams for samples (1) Zg-106 (rhyolite), and (2) Zg-119 (granite); along with U-Pb concordia diagram and KDE for (3) Zg-132 (sandstone). Error ellipses are plotted at  $2\sigma$ . Ages were calculated using Isoplot R 1.0 (Vermeesch, 2018).**

### 4.3 Whole-rock geochemistry

Due to samples distribution and geological diversity, the selected samples are organized in respect to their lithostratigraphic position, and hence treated accordingly. The whole-rock data for 32 samples are listed in supplementary table 4. For a start, we assessed the behavior of mobile elements and how it relates with the formed alteration minerals, using the diagram of Large

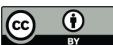

et al., (2001); and samples are plotted in (Fig. 5). The rock material loss of ignition (LOI) at 1100 °C is low for most samples (less than 2 wt. %), except for the mafic and intermediate terms of Saghro Group where it is close to 4 wt. % (e.g. basalt, gabbro and andesite samples). On plotting our data in this diagram, a homogenous hydrothermal trend is clearly defined for all samples except for sample (Zg-106). Its trend is more directed towards sericite alteration, typical of a distal ore environment (Large et al., 2001). Overall, the plot confirms that most of our samples plot in the domain of “Least altered rocks”.

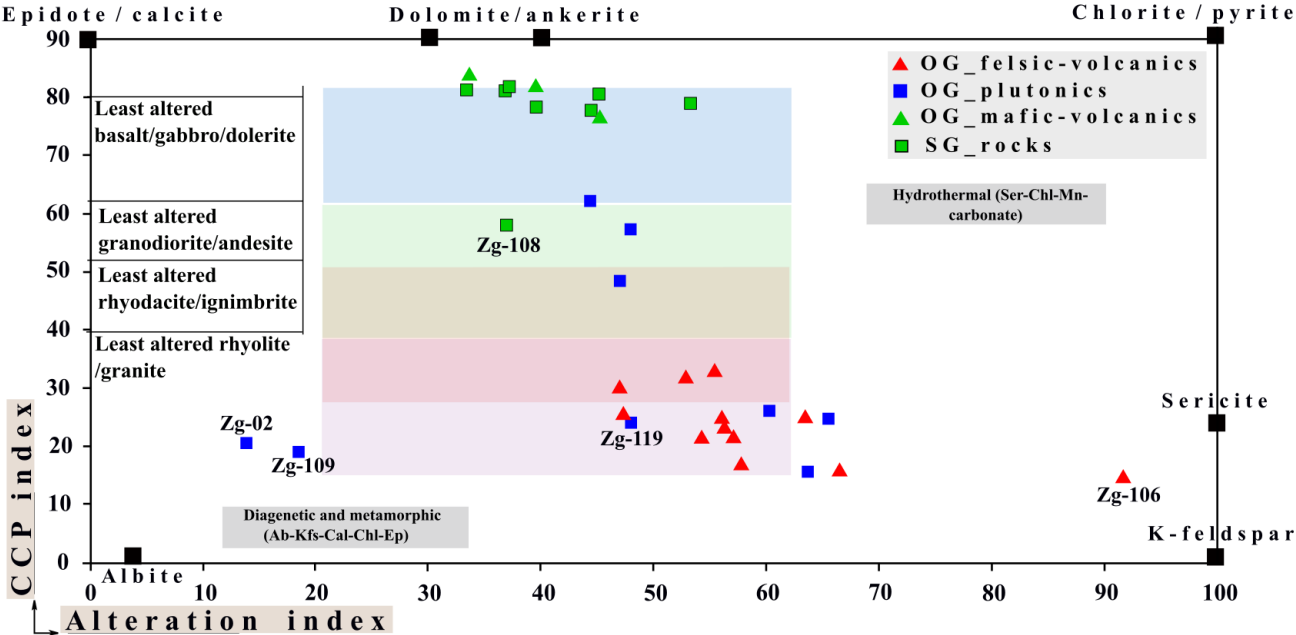

Figure 5: Plots of the studied rocks on the alteration box diagram (Large et al., 2001). Alteration Index (AI) =  $100 \times (K_2O + MgO) / (K_2O + MgO + Na_2O + CaO)$ , Chlorite-carbonate-pyrite index (CCPI) =  $100 \times (MgO + FeO) / (MgO + FeO + Na_2O + K_2O)$ .

### 4.3.1 The Saghro Group rocks

The analyzed Saghro Group rocks belong to the Tittalt Formation of the Saghro Group in the study area (Fig. 1C; Fig. 2; Thomas et al., 2002, 2004). Geochemically, they define a narrow range of compositions, with SiO<sub>2</sub> contents from 48.85 wt.% to 52.87 wt.%, except for sample (Zg-108) with SiO<sub>2</sub> of 61.15 wt.%. They contain 1.08 – 7.45 wt.% MgO; 13.44 – 15.65 wt.% Al<sub>2</sub>O<sub>3</sub>; 2.82 – 3.95 wt.%, Na<sub>2</sub>O and 0.47 – 3.07 wt.% K<sub>2</sub>O. Based on the Nb/Y vs Zr/TiO<sub>2</sub> diagram (Fig. 6a), except for one sample (Zg-108) with andesitic composition, all samples plot within a sub-alkaline basalt; similar to contemporaneous mafic-intermediate rocks from the Saghro (Errami et al., 2009) and Sirwa inliers (Thomas et al., 2002). Most rocks are metaluminous except for one sample (Zg-006) which is peraluminous (Fig. 6b). In addition, the Saghro Group rocks display a calc-alkaline signature (Fig. 6c).

Using rare earth elements (REE) (Fig. 6d), the Saghro Group samples show a total REE varying between 60.94 to 231.77 ppm with coherent patterns characterized by a slight LREEs enrichments and HREE depletion with (La/Yb)<sub>N</sub> ratios ranging from 1.83 to 6.42. Almost all samples have slight/no important negative Eu anomalies ( $\delta Eu = 0.88-0.98$ ) to less positive anomaly.

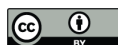

for one sample of gabbro (Zg-105;  $\text{Eu}/\text{Eu}^*$ ) $N = 1.28$ ; Fig. 6d). For the multi-elements diagram (Fig. 6e), the Saghro Group rocks exhibit an enrichment of large ion lithophile elements (LILE, like Rb, Ba, K) over high field strength elements (HFSE) with negative anomalies in Nb, Ta, and a prominent positive Pb anomaly. They do compare in the most part with basaltic rocks from the Saghro Group of Kelâat M'gouna inlier (Benziane et al., 2008; Fekkak et al., 2001), and the early gabbro sample from Sirwa (Touil et al., 2008; Fig. 6d).

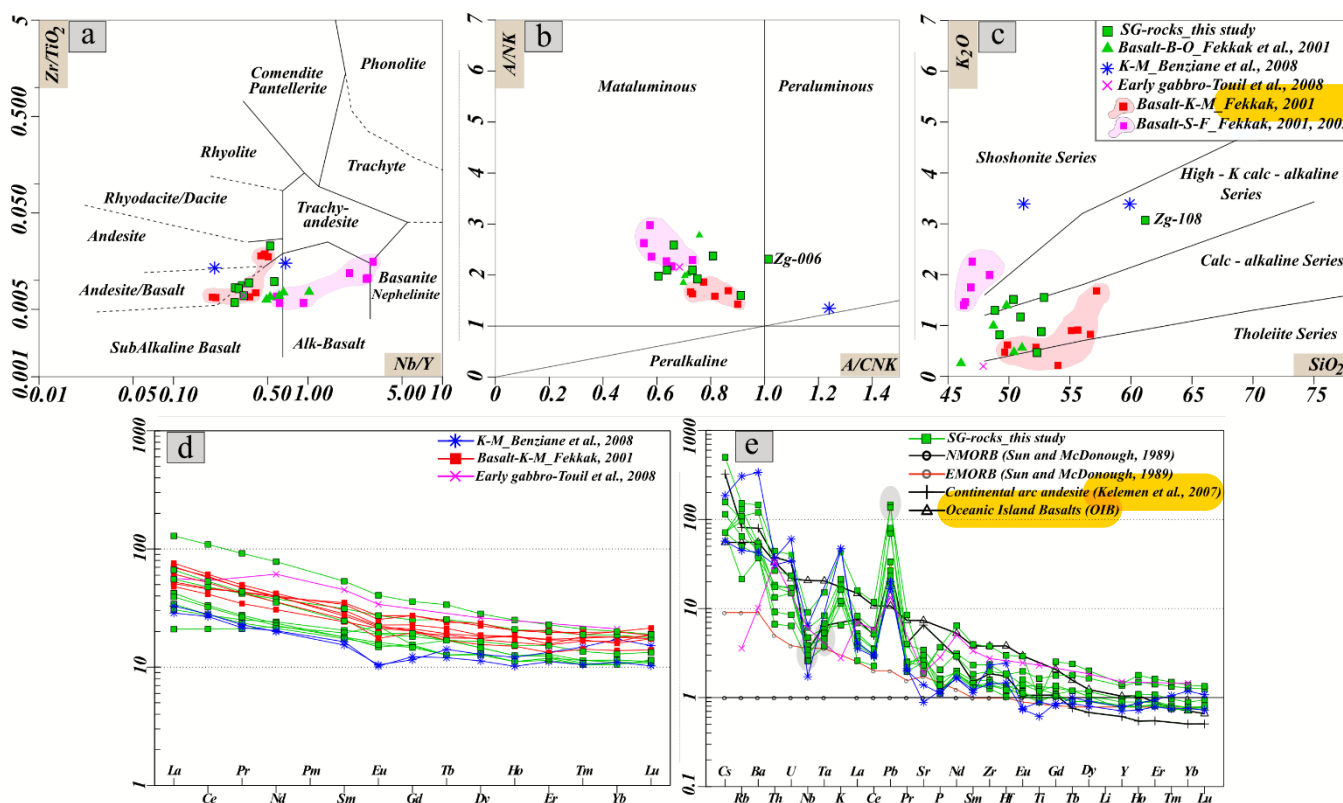

**Figure 6:** Saghro Group: (a) Nb/Y versus Zr/TiO<sub>2</sub> (Winchester and Floyd, 1977). (b) Plot of A/NK vs. A/CNK [A/CNK = molar ratio Al<sub>2</sub>O<sub>3</sub> / (CaO + Na<sub>2</sub>O + K<sub>2</sub>O) and A/NK = molar ratio Al<sub>2</sub>O<sub>3</sub> / (Na<sub>2</sub>O + K<sub>2</sub>O)] (Shand, 1943). (c) K<sub>2</sub>O versus SiO<sub>2</sub>. (d) Chondrite-normalized REE diagram of Boynton, (1984). (e) NMORB normalized diagram; normalization values are sourced from Sun and McDonough, (1989). SG samples are plotted against reference rocks from the literature. Abbreviations: B-O : Boumalne; K-M: Kelâat M'gouna; S-F: Sidi Flah.

### 4.3.2 The Ouarzazate Group rocks

The studied samples representing the Ouarzazate Group are composed of both volcanic and plutonic rocks. The felsic volcanic and plutonic samples have high contents in SiO<sub>2</sub> (79.89 – 61.16 wt.%), Al<sub>2</sub>O<sub>3</sub> (15.18 – 10.83 wt.%), and CaO (4.42 – 0.1 wt.%) and low MgO (2.83 – 0.06 wt.%), Ni (60 - 20 ppm) and Co content (19 - 1 ppm), except for one granite (Zg-119) that have relatively high Co content of 109 ppm. Moreover, they have a Na<sub>2</sub>O + K<sub>2</sub>O = 8.97 to 6.31 with a K<sub>2</sub>O/Na<sub>2</sub>O ratio of 20.75 to 0.14. Rock types for felsic volcanics are as follows: ignimbrites are represented as rhyodacite and dacite, while rhyolites and rhyolitic-ignimbrites plot inside the rhyolite field (Fig. 7a). Furthermore, the plutonic rocks occupy the granite field, with three



distinctive granodiorites (not shown). The whole set consist of high-K calc-alkaline to shoshonitic rocks (Fig. 7b), and are  
 300 peraluminous, except for the granodiorite samples that exhibit a metaluminous character (Fig. 7c). Overall, all samples plot  
 within the calc-alkaline and alkali-calcic slightly migrating towards alkaline field (Fig. 7d).

Mafic volcanics (e.g. dolerite) have moderate  $\text{SiO}_2$  contents of (51.56 – 50.58 wt.%),  $\text{Al}_2\text{O}_3$  (14.69 – 13.9 wt.%), moderate  
 CaO (7.67 – 5.61 wt.%) and moderate MgO (5.3 – 4.56 wt.%).  $\text{K}_2\text{O}/\text{Na}_2\text{O}$  ratio values are 0.73 to 0.26, along with  $\text{Na}_2\text{O}+\text{K}_2\text{O}$   
 305 ratio = 5.64 to 3.58 (supplementary table 4). They are sub-alkaline basalts (Fig. 7a), with a calc-alkaline signature (Fig. 7b),  
 and a metaluminous character (Fig. 7c).

In the REE diagram (Fig. 7e), all felsic volcanic and plutonic samples show homogeneous patterns, with enriched LREEs over  
 HREEs.  $(\text{La}/\text{Yb})_N$  ratio varies between 17.93 and 2.1, except for one rhyolitic sample Zg-106 with  $(\text{La}/\text{Yb})_N$  of 0.89. All  
 samples have high Eu negative anomaly ( $\text{Eu}/\text{Eu}^* = 0.61 - 0.34$ , except for the same Zg-106 sample, that exhibits a prominent  
 Eu anomaly with  $\text{Eu}/\text{Eu}^* = 0.04$ , controlled by advanced plagioclase crystallization. In the multi-element spider diagram, all  
 310 samples display enrichments in LILEs (Cs, Rb, Ba, Th, and U) and depletion in HFSEs (Zr, Nb, Hf and Ta), relative to Primitive  
 Mantle (Fig. 7f). Plus, samples show a prominent negative anomaly in Nb, Ta, P and Ti along a positive anomaly in Pb, Ba  
 and Th, except for sample Zg-106 that lacks negative Nb anomaly.

For the mafic volcanics, the REE normalized to chondrite (Fig. 7e) show moderate LREE enrichments over HREE with less  
 fractional patterns ( $(\text{La}/\text{Yb})_N = 6.22$  to 5.94) and very low/absent Eu anomaly ( $\text{Eu}/\text{Eu}^* = 0.98$  to 0.88). However, our dolerites  
 315 are distinguished by their homogenous pattern with a prominent Pb enrichment, with less significant Sr anomaly (Fig. 7f). Our  
 dolerites resemble those of the Tifnout Valley (TV), Group A and B, and Zaghar mafic dikes from the Sirwa massif by  
 Belkacim et al., (2017); Touil et al., (1999); Toummite et al., (2013), respectively. Even so, minor differences related to  
 prominent negative Nb and Ti anomaly are observed for reference samples compared to our dolerites' positive Ti anomaly  
 (Fig. 7f). However, they differ from the Bas Drâa inlier mafic-intermediate bodies, which lack Pb enrichment and Sr depletion  
 320 Karaoui et al., (2014).

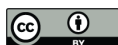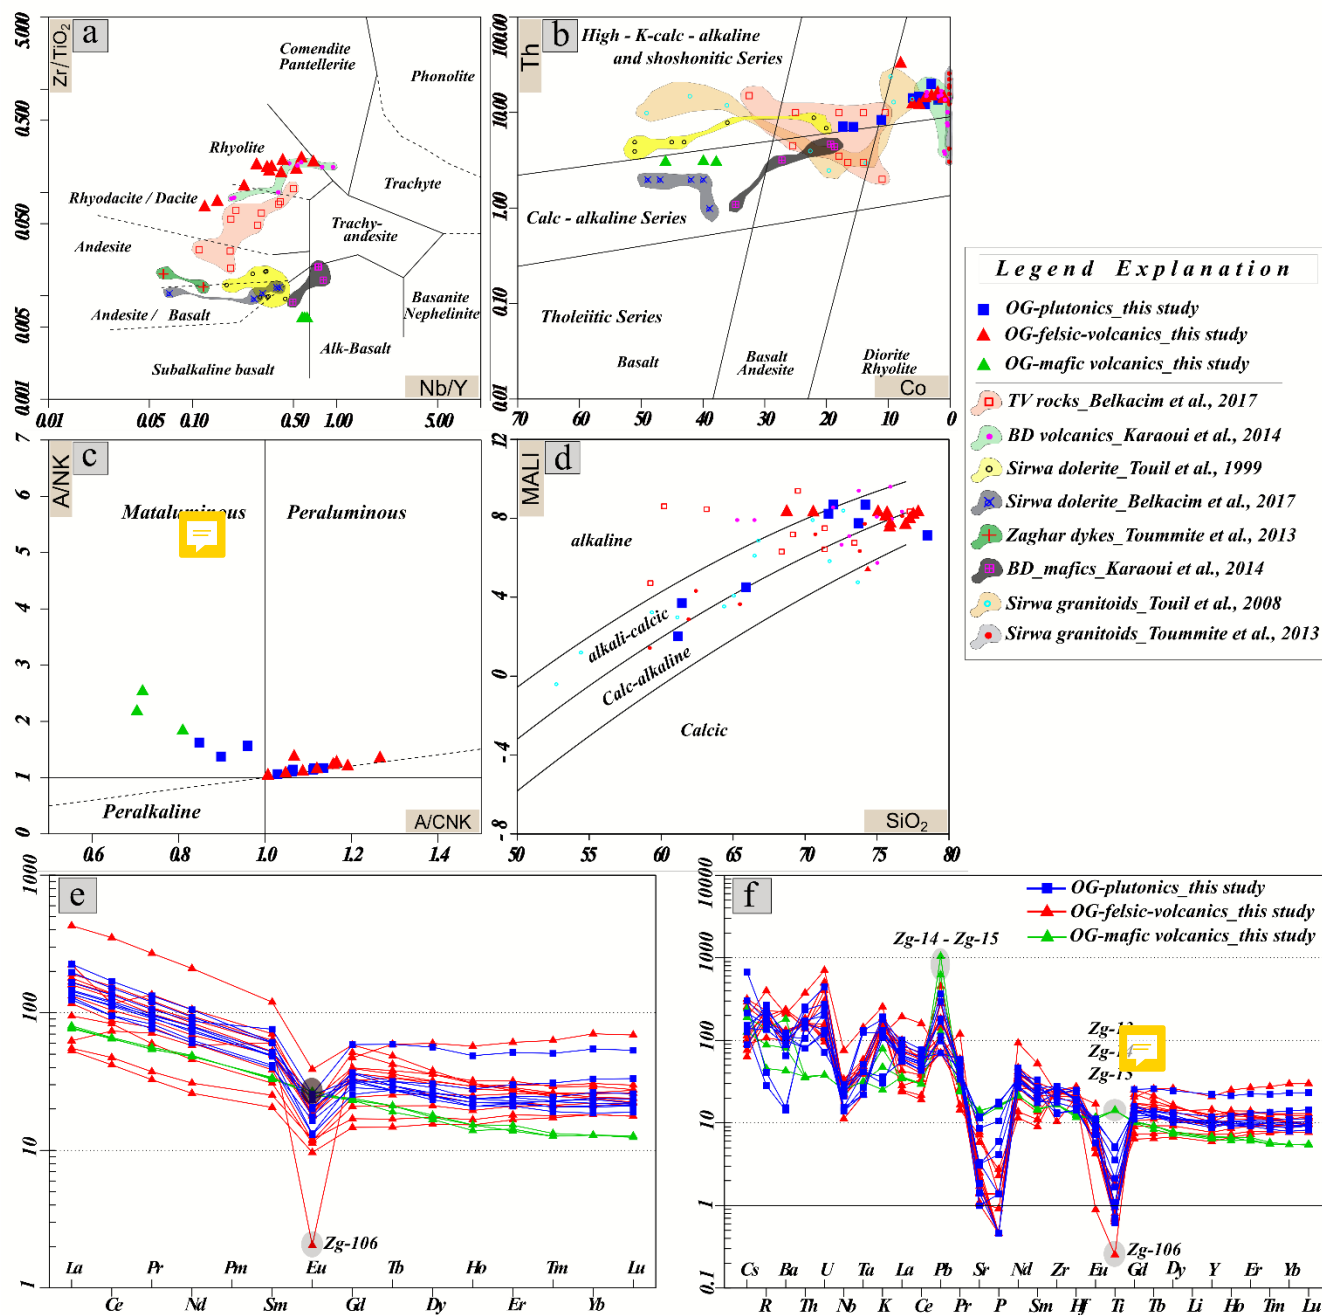

Figure 7: Ouarzazate Group: (a) Nb/Y versus Zr/TiO<sub>2</sub> (Winchester and Floyd, 1977). (b) Th vs Co plot of Hastie et al., (2007). (c) Plot of A/NK vs. A/CNK of Shand, (1943). (d) MALI diagram of Frost et al., (2001). (e) Chondrite-normalized REE diagram of Boynton, (1984). (f) Primitive mantle normalized diagram of Sun and McDonough, (1989). OG samples are plotted against reference rocks from the literature. Abbreviations: TV: Tifnoute Valley; BD: Bas Draâ.

325



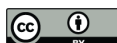

#### 4.4 Significance of Sm-Nd isotopic data

Sm-Nd isotopic studies of seven representative samples covering the Ediacaran record of the Sirwa massif reveal petrogenesis processes and orogenic evolution between the 630 to 538 Ma evolution of the Anti-Atlas belt post-Bou Azzer-Sirwa ophiolite accretion. Results are listed in table 2.

| Lithology                     | Sample code | Sm (ppm) | Nd (ppm) | $^{147}\text{Sm}/^{144}\text{Nd}$ | $^{143}\text{Nd}/^{144}\text{Nd}$ | $\pm 2 \text{ SE}$ | $\epsilon\text{Nd}(0)$ | $\epsilon\text{Nd}(570)$ | TDM (Goldstein) Ma | TDM Ga |
|-------------------------------|-------------|----------|----------|-----------------------------------|-----------------------------------|--------------------|------------------------|--------------------------|--------------------|--------|
| <b>Ouarzazate Group rocks</b> |             |          |          |                                   |                                   |                    |                        |                          |                    |        |
| Granodiorite                  | Zg-09       | 10.23    | 50.70    | 0.1220                            | 0.512414                          | 0.000005           | - 4,4                  | + 1,1                    | 1252,8             | 1,24   |
| Dolerite                      | Zg-14       | 6.518    | 28.99    | 0.1359                            | 0.512390                          | 0.000010           | - 4,8                  | - 0,4                    | 1526,7             | 1,51   |
| Rhyolite                      | Zg-106      | 11.50    | 32.75    | 0.2124                            | 0.512693                          | 0.000007           | + 1,1                  | - 0,1                    | 0                  | N/A    |
| Rhyolite                      | Zg-117      | 10.69    | 50.59    | 0.1278                            | 0.512332                          | 0.000011           | - 6,0                  | - 0,9                    | 1483,7             | 1,47   |
| Granite                       | Zg-119      | 9.106    | 42.92    | 0.1283                            | 0.512381                          | 0.000009           | - 5,0                  | 0,0                      | 1404,8             | 1,39   |
| <b>Saghro Group rocks</b>     |             |          |          |                                   |                                   |                    |                        |                          |                    |        |
| Gabbro                        | Zg-105      | 3.739    | 13.27    | 0.1704                            | 0.512762                          | 0.000011           | + 2,4                  | + 4,5                    | 1431,6             | N/A    |
| Andesite                      | Zg-108      | 8.943    | 40.03    | 0.1351                            | 0.512550                          | 0.000007           | - 1,7                  | + 3,2                    | 1197,3             | 1,19   |

**Table 2: Sm-Nd isotopic data for the analyzed Saghro Group and Ouarzazate Group rocks. TDM is the Depleted Mantle Age in Ga calculated using the linear model of Goldstein et al., (1984); and is not calculated for samples with  $^{147}\text{Sm}/^{144}\text{Nd}$  ratios greater than 0.145 (e.g. Zg-106, Zg-105). Abbreviations:  $\pm 2 \text{ SE}$ : Standard Errors (Uncertainty in Nd isotopic composition); N/A : Not Available.**

Based on field relationships, An angular unconformity (Errami et al., 2009; Thomas et al., 2002), and a significant sedimentary/magmatic gap exist between the 630 - 600 Ma Saghro Group and the overlaying 570 - 538 Ma Ouarzazate Group (Errami et al., 2021a). We have used the 620 Ma as a reference age for  $\epsilon\text{Nd}$  analyses of Saghro Group samples (Zg-105, and Zg-108). They show narrow ( $^{143}\text{Nd}/^{144}\text{Nd}$ ) 620 Ma ratios, from 0.512001 to 0.512070, and positive  $\epsilon\text{Nd}$  (at 620 Ma) values between + 3.2 to + 4.5. Additionally, the TDM model ages (Fig. 8a), ranging from 1431 - 1197 Ma, exceed the individual maximum depositional ages of 630 to 600 Ma, and the crystallization ages of pre to contemporaneous igneous intrusions found elsewhere in the Anti-Atlas belt that fall within the bracket of 640 Ma to 580 Ma, respectively (Errami et al., 2021a; O'Connor et al., 2010; Liégeois et al., 2006; Gasquet et al., 2005; Mrini, 1993). Overall, the Saghro Group samples show a mixed origin with  $\epsilon\text{Nd}$  (620 Ma) ranging from + 3.2 to + 4.5, indicating a blend of mantle-derived magma and moderate contribution of an old crust (Paleoproterozoic ?). This contrasts the basaltic rocks studied in the Saghro region by Errami et al., (2009), for which  $\epsilon\text{Nd}$  (at 640 Ma) vary between + 7.63 to + 8.08, suggesting a juvenile source, with no Paleoproterozoic influence. Consequently, authors argued that the Saghro Group's sedimentary and volcanic deposits attest to an active back-arc basin, with the arc itself located north of the Saghro mountains in the Saghro inlier (Errami et al., 2009).

Ouarzazate Group rocks exhibit a mostly uniform distribution with ( $^{143}\text{Nd}/^{144}\text{Nd}$ ) 570 Ma values from 0.511855 to 0.511958. These ratios are close to or slightly lower than the Chondritic Uniform Reservoir (CHUR) values. Moreover, for all samples, the  $\epsilon\text{Nd}570$  values range from - 0.9 to + 1.1. Volcanic rocks show negative  $\epsilon\text{Nd}570$  values: -0.9 (Tadmant rhyolite), - 0.1 (Ouarzazate Group rhyolite), and - 0.4 (dolerite). Granitoids have  $\epsilon\text{Nd}570$  values of + 0.0 to + 1.1 for Zg-119 and Zg-09, respectively. This range in values suggests mixing or variable degrees of interaction between a mantle source and an older



crustal component. In addition, the TDM model ages for all of these samples range from 1526 to 1252 Ma (Fig. 8c), indicating a Mesoproterozoic affinity, even though the effect is limited. Admitting that Mesoproterozoic rocks are scarce to absent in the Anti-Atlas, these Proterozoic TDM ages, in conjunction with the mixed (near zero)  $\epsilon\text{Nd}$  (570 Ma) values for both volcanic and plutonic rocks, strongly suggest that the magma for the Ouarzazate Group are likely to represent mixed values involving a Pan-African juvenile mantle together with moderate but discernible contribution from an older crustal material of Mesoproterozoic in age, which itself incorporated some even older (Paleoproterozoic ?) material (Baidada et al., 2017; El Bahat et al., 2017; Blein et al., 2014b; Gasquet et al., 2005; Thomas et al., 2002) (Fig. 8d). All in all, these results do confirm the presence of an old cratonic basement beneath the Central Anti-Atlas.

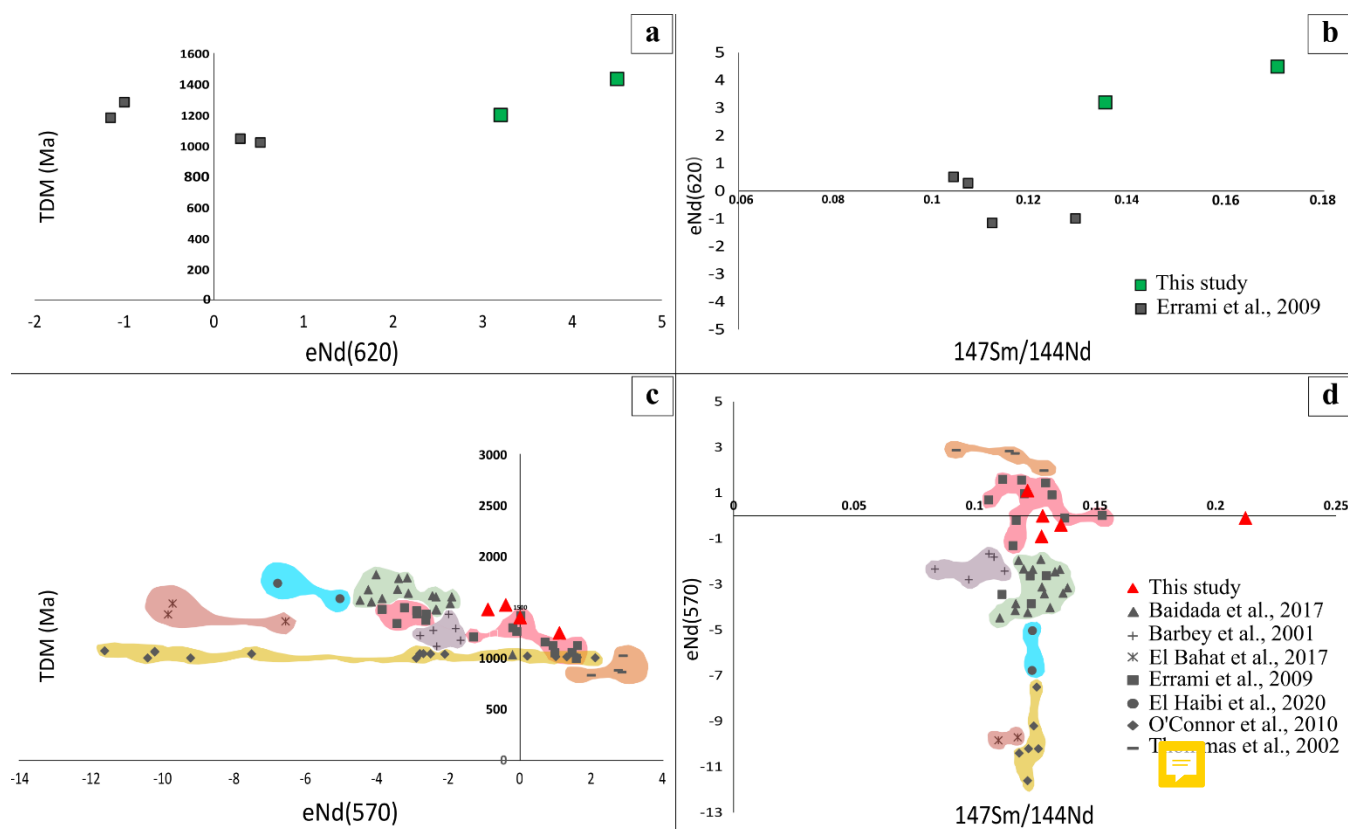

**Figure 8:** (a)  $\epsilon\text{Nd}_{620}$  vs TDM model ages for SG. (b)  $\epsilon\text{Nd}_{620}$  vs  $^{147}\text{Sm}/^{144}\text{Nd}$  diagram for SG. (c)  $\epsilon\text{Nd}_{570}$  vs TDM model ages for OG. (d)  $\epsilon\text{Nd}_{570}$  vs  $^{147}\text{Sm}/^{144}\text{Nd}$  diagram for OG rocks. All samples are compared with selected and available reference rocks from the literature.





## 5 Discussions

### 5.1 Petrogenesis

#### 5.1.1 The Saghro Group rocks

The Saghro Group rocks consist of basaltic lava flows interbedded with marine, low-grade metasediments. The geochemical fingerprint of the mafic rocks is well-suited for investigating the orogenic processes involved in magma genesis (Pearce, 1983; Wood, 1980). However, it is crucial to evaluate the effects of alteration, metamorphism, and crustal contamination before exploring the magmatic evolution.

##### ▪ Alteration effect

The analyzed samples exhibit loss on ignition (LOI) values of 2 to 4 wt.%, implying major elements and LILE mobility during alteration process (supplementary table 4). Saghro Group basalt samples display scattered ~~large-ion-lithophile elements (LILEs; e.g., K, Rb, Na, Sr, Pb)~~ vs. Zr, suggesting alteration variances. In contrast, binary plots of ~~high-field-strength elements (HFSEs; e.g., Nb, Ta, Ti, Hf)~~ and ~~rare-earth elements (REEs)~~ against Zr exhibit consistent linear trends, reflecting their immobile nature (Pearce, 1996; supplementary table 4). All samples from this Group are classified as minimally altered basalts (Large et al., 2001) (Fig. 5).

##### ▪ Fractional crystallization and crustal contamination

The analyzed samples predominantly consist of basalts displaying negative correlations for  $\text{Al}_2\text{O}_3$ , CaO, MgO,  $\text{Fe}_2\text{O}_3$ , and  $\text{TiO}_2$  vs. Zr, and a positive correlation for  $\text{P}_2\text{O}_5$ , indicating fractional crystallization during magma evolution. The Mg# values (12.13 to 43.26), reflect early fractionation of ferromagnesian minerals, and suggest that the Saghro Group samples are not derived from a primitive melt. Furthermore, the absence of a significant Eu anomaly ( $\delta\text{Eu} = 0.88\text{--}1.28$ ) indicates limited plagioclase fractionation (Fig. 6d). The lack of a negative Eu anomaly, despite the evolved nature of the magmas (low Mg#), is likely due to the mixing of evolved basaltic magmas (low Mg#), with more primitive magmas that lacked plagioclase fractionation.

In a contamination-sensitive trace element diagram (Th/Ce and Th/La) (Fig. 9a), our samples show ratios of 0.047 to 0.080 and 0.115 to 0.172, respectively. The trend suggest that crustal contamination played a significant role in magma genesis (Taylor and McLennan, 1995). Additionally, the low Ce/Pb ratio ( $\sim 4.3$ ) further highlights continental crustal influence (Hofmann et al., 1986; supplementary table 4 for calculation). Further, a binary mixing model with Nd isotopic data (supplementary table 4 for calculation; De Paolo, 1981), interprets the Saghro Group basalts as formed from the mixing of a magmatic melt contaminated by 17 – 18% Paleoproterozoic continental crust ( $\epsilon\text{Nd}_{620} = -16$ ; Ennih and Liégeois, 2008) and 82 – 83% primitive mantle ( $\epsilon\text{Nd}_{620} = +8$ ; Errami et al., 2009). This is further supported by the negative correlation of  $\epsilon\text{Nd}$  values with  $\text{SiO}_2$ , and relatively low  $\epsilon\text{Nd}$  values (+ 3.2 to + 4.5), compared to contemporary mantle-derived Saghro inlier basalts ( $\epsilon\text{Nd} = +8$ ; Errami et al., 2009).

However, the observed enrichment may stem from either continental crust contamination or mantle source enrichment. The Th/Ce and Th/La ratios for our samples plot linearly near the MORB reservoir, far from the upper continental crust (UCC)



field, suggesting limited direct crustal input (Fig. 9a). Moreover, ratios such as (Sm/Yb)N versus (Nb/La)N (Safonova et al., 2016), sensitive to the nature of the mantle source, range from 1.64 to 2.74 and 0.50 to 0.91, respectively. These values place the Saghro Group samples in a transitional domain between MORB and IAB, closer to the field of back-arc basalts (BAB) (Fig. 9b). Similarly, Th/Nb and Ta/Nd ratios (0.12 – 0.30 and 0.03 – 0.06, respectively) indicate a transitional composition between MORB and the mafic lower continental crust (MLCC) (Aldanmaz et al., 2008; Fig. 9c), in alignment with the source diagram (Laurent et al., 2014; Fig. 9d), where all the Saghro Group rocks derived from fractional crystallization and contamination/assimilation of primary mafic lithologies straddling the boundary between high-K to low-K mafic rocks. Overall, the Saghro Group samples originate from the melting of an enriched source transitional between MORB and IAB, followed by fractional crystallization involving ferromagnesian minerals and assimilation of lower Paleoproterozoic continental crust.

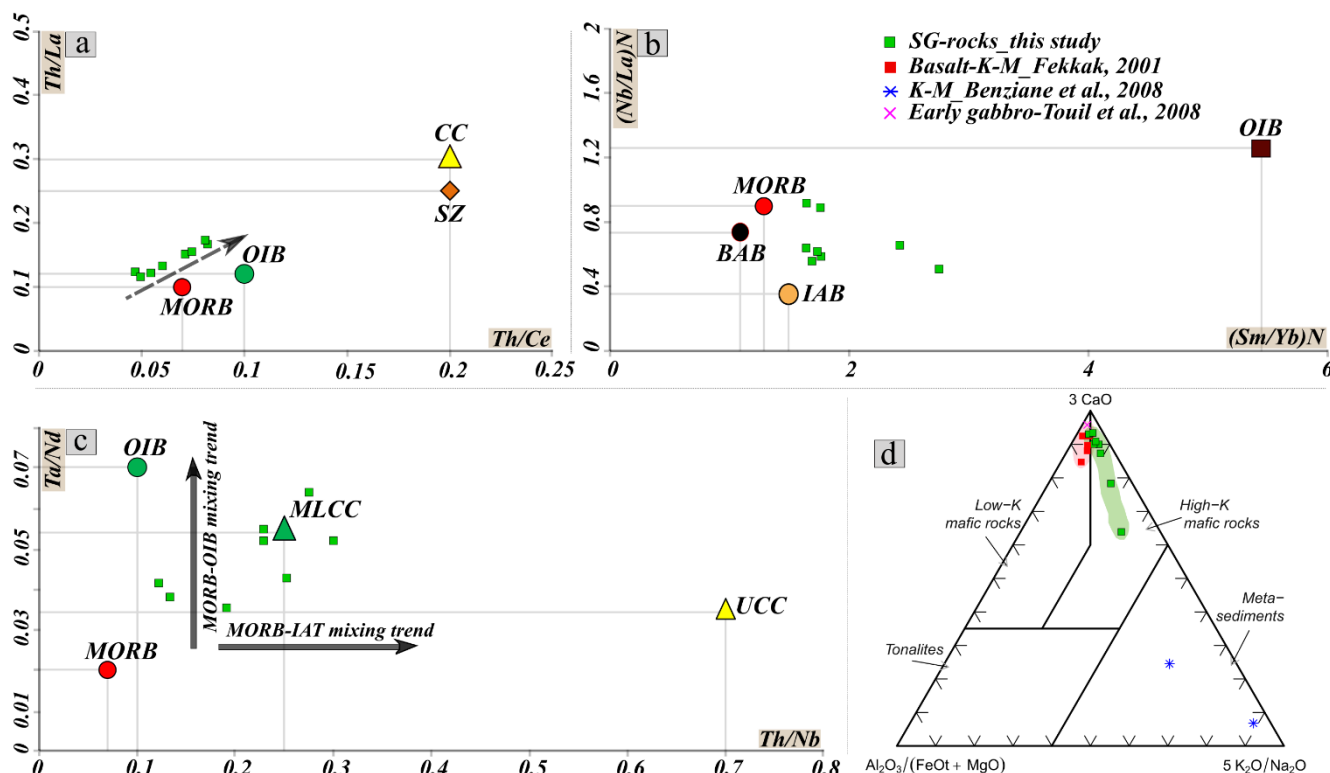

Figure 9: Saghro Group: (a) Th/Ce vs Th/La ratios for SG (Taylor and Mc Lennan, 1995). (b) plot of (Sm/Yb)N vs (Nb/La)N (Safonova et al., 2016). (c) Th/Nb vs Ta/Nd plot (Aldanmaz et al., 2008). (d) The source diagram of Laurent et al., (2014). Abbreviations: K-M: Kelâat M'gouna.

### 5.1.2 The Ouarzazate Group rocks

- Fractional crystallization and crustal contamination



The Ouarzazate Group's volcanic and plutonic rocks exhibit chemical evolution that can be explained by fractional crystallization, with decreasing  $\text{Al}_2\text{O}_3$ ,  $\text{Fe}_2\text{O}_3$ ,  $\text{MgO}$ ,  $\text{CaO}$ ,  $\text{TiO}_2$ , and  $\text{P}_2\text{O}_5$  vs. rising  $\text{SiO}_2$ . Major elements vs. Zr show no significant correlations (not shown: see supplementary table 4). Selected trace elements, such as Sr, decrease with rising  $\text{SiO}_2$ , typical of plagioclase crystallization. Interestingly, Some trace elements (e.g. Cr, Ni, Ba, Rb, Zr) show disruptions in their patterns with increasing  $\text{SiO}_2$ . Ni uniformly declines then sharply increases, Cr rises steadily then increases, while Ba, Zr, and Rb rise then decline, particularly at 70 wt.%  $\text{SiO}_2$  (Fig. 10a). These patterns are likely due to a magma recharge event affecting pre-magma's crystallization (Fig. 10a).

Felsic volcanics and plutonics ~~compensate for~~ Sr and P depletion due to plagioclase and apatite fractionation (Fig. 7f). A prominent negative Eu anomaly in rhyolite Zg-106 indicates early **calcic phase** crystallization, while the absence of an Eu anomaly in dolerites suggests limited plagioclase involvement (Fig. 7e). Additionally, their Pb enrichment indicates crust assimilation (Fig. 7f). The high La (16.4 to 133 ppm) and Ce (33.8 to 284 ppm) values in the Ouarzazate Group samples suggest interaction between parental magma (s) and crust material, indicating enrichment due to either assimilation of continental crust or a combination of assimilation and fractional crystallization during magma ascent (De Paolo, 1981). Further, fractional crystallization relates to correlations between Zr and Th/Nb ratios (Fig. 10b), as most of the Ouarzazate Group felsic volcanics and plutonics **show similar Th/Nb and Zr trends**, indicating significant assimilation and fractional crystallization in magma evolution. Some plutonics, however, show a limited Th/Nb range, suggesting bulk assimilation control (Fig. 10b). This is supported by the La/Sm versus La diagram (Fig. 10c) indicating source heterogeneity, despite fractional crystallization's dominance. The Y/Nb versus  $\text{SiO}_2$  wt.% (Fig. 10d) confirms a crustal source with varying differentiation. Depletions in P, Nb, and Ti in Ouarzazate Group rocks (Fig. 7f) suggest crustal contamination and hydrous metasomatism, with P anomalies linked to Nb and Ti depletions (Campbell et al., 1994). In addition, the depletion of HFSEs like Nb and Ti might also indicate magmatic arc signatures and possible crustal contamination during magma processes (Wilson, 1989). All samples show slight K enrichments (Fig. 7f), likely related to fluids from subducted sediments (Beraaouz et al., 2004).

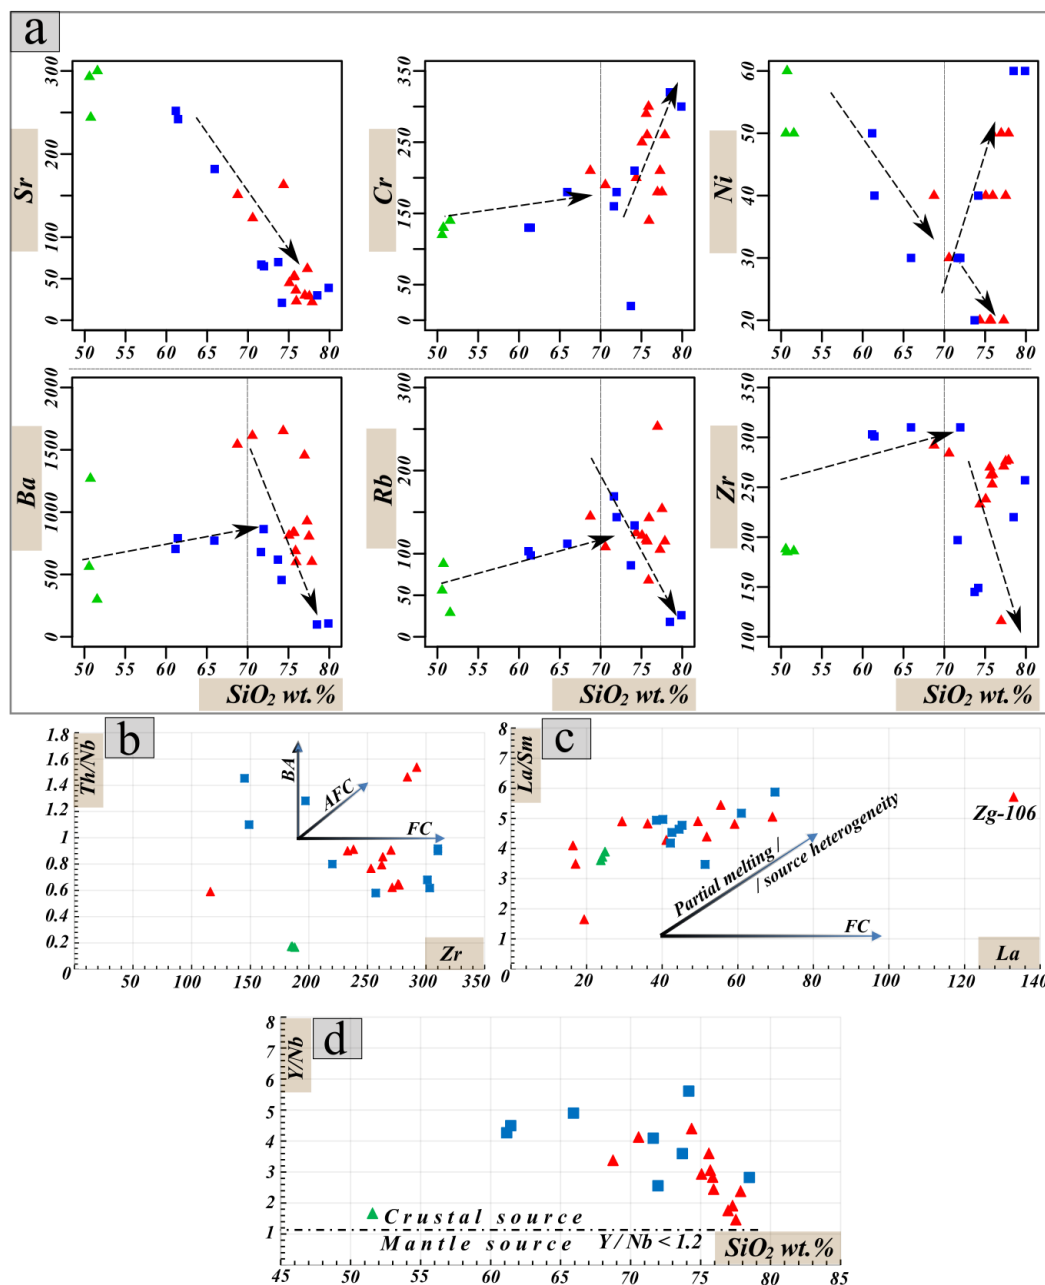

**Figure 10: Ouarzazate Group: (a) Harker variation diagrams for selected trace elements (e.g. Sr, Cr, Ni, Ba, Rb, Zr) for the OG rocks. (b) plot of Th/Nb vs Zr. (c) La/Sm vs La plot. (d) Y/Nb vs increasing  $\text{SiO}_2$  (Eby, 1990) for the  $\text{Y}/\text{Nb} = 1.2$  discriminating value. Abbreviations: BA: Bulk Assimilation; AFC: Assimilation and Fractional Crystallization; FC: Fractional Crystallization.**

#### ▪ Magma types and source characteristics

440 The coherent negative anomalies in Nb, P, and Ti in the Ouarzazate Group samples might suggest an exclusive crustal origin, with minor discrepancies due to advanced degrees of differentiation. These features may also arise from low partial melting

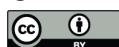

of metasomatized mantle contaminated by continental material (O'Reilly and Griffin, 2013), as supported by  $\epsilon\text{Nd}$  values (- 0.9 to + 1.1) indicating juvenile magma contributions. Indeed, trace elements and isotopic compositions can clarify subduction input versus crustal contamination. The Ouarzazate Group rocks show significant LILE and LREE enrichment with Nb-Ta depletion, indicating a metasomatized lithospheric mantle from subduction or assimilation of enriched continental crust (Fig. 7-f). Furthermore, the Th/Yb versus Ta/Yb diagram suggests that the magma source originated from an E-MORB-type mantle, evolving through contamination and Assimilation-Fractional Crystallization, as evidenced by the trend of the samples toward the average upper continental crust (Fig. 12a). This interpretation is consistent with the moderate  $\epsilon\text{Nd}$  values and TDM ages that reflect contributions from both mantle and continental crustal components, highlighting the importance of crustal contribution over **sediment zone enrichment** (Fig. 12b). All in all, the primary magma responsible for the genesis of the Ouarzazate Group rocks sourced from an enriched continental lithospheric mantle, previously underwent metasomatism by fluids from ~~former~~ Neoproterozoic subduction.

## 5.2 Geodynamic implications and regional correlations

### 5.2.1 The Saghro Group

Previously, the Saghro Group basin was interpreted as consisting of distal deep marine sediments equivalent to the platform series of Tachdamt Group, formed during the initial rifting associated with the Rodinia breakup (Thomas et al., 2002). However, recent zircon data from the Saghro Group sediments in the Sirwa and Saghro inliers suggest its deposition, post the Bou Azzer–Sirwa ophiolite accretion, during the main Pan-African orogeny (Abati et al., 2010; Errami et al., 2009; Liégeois et al., 2006).

Basaltic samples from the Sirwa inlier (this study) show enrichment in ~~large ion lithophile elements (LILE)~~ and ~~light rare earth elements (LREE)~~ relative to ~~high field strength elements (HFSE)~~ and ~~heavy rare earth elements (HREE)~~. They also exhibit pronounced negative anomalies in Nb, Ta, and Ti, suggesting a subduction zone fluids influence (Wilson, 1989). Despite this, the basalts feature high Zr and relatively low Y concentrations, classifying them as within-plate basalts (WPB) (Fig. 11a). This dual geochemical signature, blending within-plate and active margin characteristics, is further evidenced by their Ti/Y and Zr/Y ratios which plot in transitional field in the geotectonic discrimination diagram (Ti/Y versus Zr/Y; Pearce and Gale, (1977), not shown). Indeed, the coexistence of geotectonic signatures from both active continental margins and within-plate settings is characteristic of magmas generated during back-arc extension (Shinjo and Kato, 2000).

In this context, the subduction-related signature is acquired through mantle metasomatism by sediment/fluid-derived components during arc activity, while the within-plate signature emerges later during back-arc extension processes. This interpretation aligns with the geochemical characteristics of the Saghro Group basalts, which plot within the fields of mid-ocean ridge basalt (MORB) and back-arc basin basalt (BABB) (Fig. 11b). Moreover, the active margin signature is supported by high Th/Nb and low U/Th ratios in the Saghro Group basalts (refer to supplementary table 4). Further, the influence of



subduction-related components is further highlighted by the ThN vs NbN ratios, with the basalts plotting above the MORB-OIB array (Fig. 11c). This pattern indicates a mantle source enriched during continental arc processes (Pearce, 1983).

475 At a regional scale, basaltic flows have been described as interbedded within the sediments of the Saghro Group in the Saghro massif (Errami et al., 2009; Fekkak et al., 2003, 2001). They exhibit diverse geochemical signatures. For a start, the basalts in Sidi Flah (SF) are of Initial Rift Tholeiites (IRT) and Ocean Island Basalts (OIB) character, while those from the Kelâat M'gouna (KM) inlier are Nb-depleted. In contrast, the Anou N'Izem basalts in the Boumalne (BO) inlier possess typical Mid-Ocean Ridge Basalt (MORB) signatures. U-Pb dating of detrital zircons from the Saghro Group in various inliers suggests that

480 this unit was deposited between 640 - 600 Ma across the entire Central-Eastern Anti-Atlas region (Errami et al., 2021a; Abati et al., 2010) (Fig. 13A). This geochemical variation may reflect a single geodynamic event. Specifically, during the evolution of a back-arc basin, the earliest magmas generated often exhibit magmatic arc characteristics due to the proximity of the back-arc to the arc itself. As the back-arc basin evolves and the magma source becomes further removed from the metasomatised mantle, the magmas acquire within-plate geochemical signatures (Vasey et al., 2021; Saunders and Tarney, 1984). Overall,

485 basaltic magmatism in the Saghro Group fits this evolutionary framework. For instance, calc-alkaline basalts from the Sirwa inlier (Thomas et al., 2002; This study), reflect initial stages in back-arc formation. Conversely, and higher in the stratigraphy; IRT, OIB, and MORB-type basalts indicate later stages in back-arc evolution. This interpretation is consistent with sediment geochemistry suggesting back-arc basin deposition (Ouguir et al., 1996). Furthermore, this scenario aligns with the paleogeographic position of the Anti-Atlas during the Ediacaran. During that time, the Anti-Atlas region was dissected in a

490 northward direction (present coordinates) due to south-dipping Cadomian subduction (Fig. 13) (Rojo-Pérez et al., 2024; Stern, 2024; Errami et al., 2021a; Linneman et al., 2014).

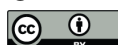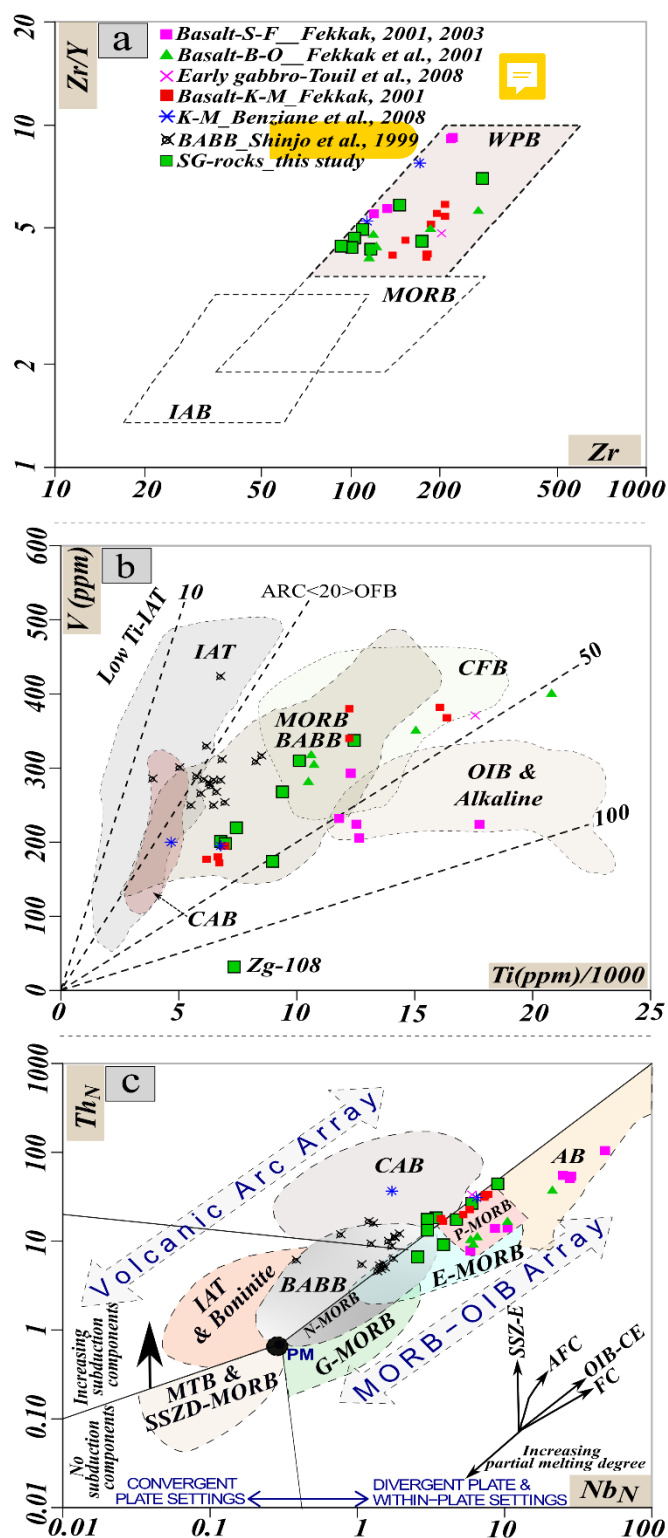

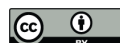

**Figure 11: Saghro Group: (a) Zr/Y vs Zr plot for basalts of SG (Pearce and Norry, 1979). (b) V vs Ti/1000 plot (Shervais, 1982). (c) plot of  $Th_N$  vs  $Nb_N$  ratios (Saccani, 2015). Abbreviations: B-O : Boumalne; K-M: Kelâat M'gouna; S-F: Sidi Flah; BABB: Back-arc basin basalts.**

### 5.2.2 The Ouarzazate Group

On the tectonic discrimination diagrams (Fig. 12b-c), the Ouarzazate Group rocks display geochemical characteristics ranging from dominating within-plate to minor active continental margins (oceanic island arcs). Plus, the high Th/Yb ratios  $> 1$  for all rocks refer to a metasomatised mantle source in subduction zone and/or crustal contamination. All in all, the whole accounts for a post-collisional setting (Fig. 12c), involving partial melting of a pre-existing lithospheric source, either a mantle or crust. Hence, controlling the recharge in  $K_2O$  and LILE (e.g. Rb, Ba) contents for the majority of our samples (Fig. 11a). Additionally, the alkali-calcic to high-K calc-alkaline signature of our samples is in fact typical to post-collisional events (Liégeois et al., 1998, and reference therein).

The Ediacaran magmatism of the Ouarzazate Group is still debated as being fully post-collisional and linked to asthenospheric rise (upwelling) beneath the WAC during its metacratonic evolution (Belkacim et al., 2017; Gasquet et al., 2008, 2005; Liégeois et al., 2006; Thomas et al., 2002), or related to subduction (Walsh et al., 2012; Benziane, 2007; El Baghdadi et al., 2003), or even representing the Iapetus Ocean opening with ties to the Ediacaran Central Iapetus Magmatic Province (CIMP; Youbi et al., 2020). Nonetheless, subduction-related features can arise in a non-subduction settings without coeval subduction (Morris et al., 2000; M'arquez et al., 1999; Cousens, 1996; Hooper et al., 1995).

Regional correlations with similar magmatism lead us to attribute the Ouarzazate Group to a post-collisional event also exemplified in numerous inliers of the Anti-Atlas (Fig. 13C-D) (Yajoui et al., 2020; Karaoui et al., 2015; Linneman et al., 2014; Toummite et al., 2013; Walsh et al., 2012; Gasquet et al., 2005, 2004; Thomas et al., 2002).



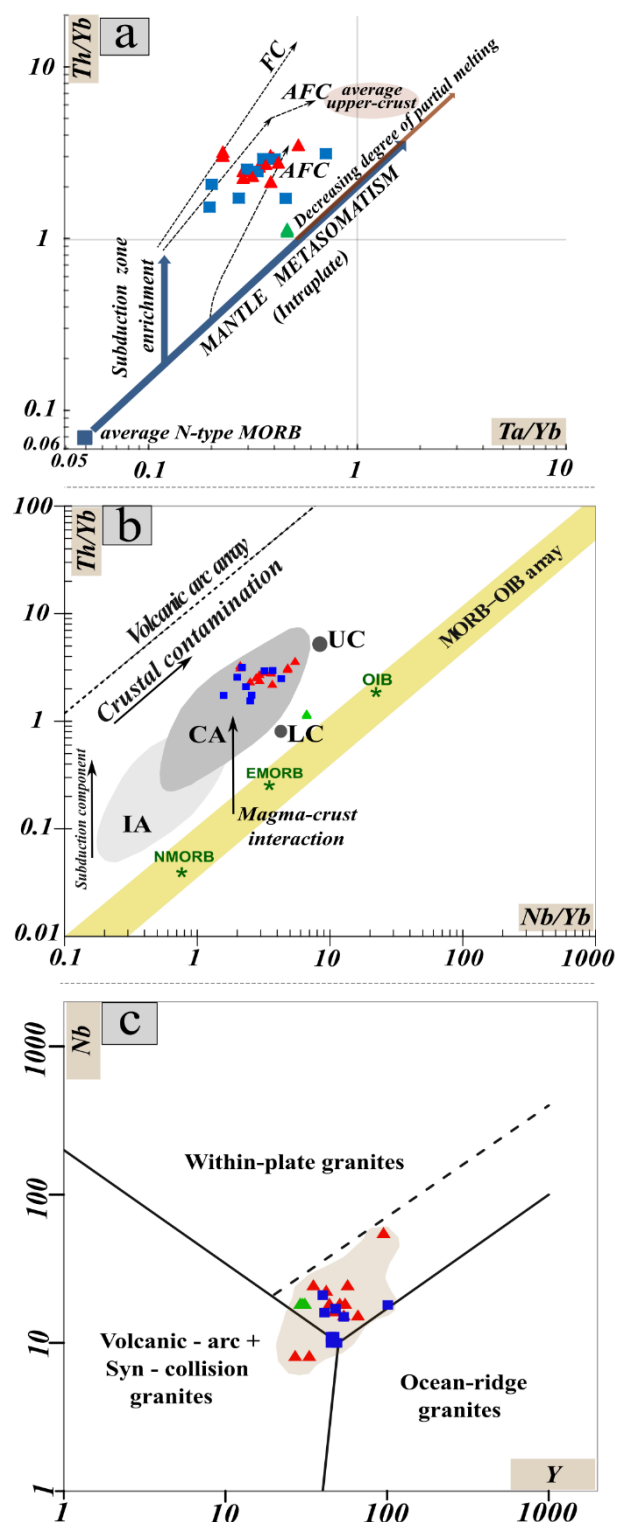



**Figure 12: (a) Th/Yb vs Ta/Yb plot for OG rocks. (b) Nb/Yb vs Th/Yb diagram of Pearce, (2008). (c) Nb versus Y diagram (Pearce et al., 1984) depicting evolution from volcanic arc granite to within-plate granite.**

### 5.3 Significance of LA-ICP-MS U-Pb data

#### 5.3.1 U-Pb zircon age record on magmatic rocks of the OG

Reliable new U-Pb zircon ages on two magmatic samples (Zg-106, and Zg-119; Fig. 4), representing the Ouarzazate Group from the Sirwa massif returned ages of  $575 \pm 3$  Ma and the  $564 \pm 2$  Ma, respectively. These ages are consistent with a lower Ouarzazate Group affinity, and represent the extension of the Ediacaran magmatism previously described in numerous inliers of the Anti-Atlas belt (Yajoui et al., 2020; Karaoui et al., 2015; Hefferan et al., 2014, and references therein; Toummite et al., 2013; Walsh et al., 2012; Gasquet et al., 2005, 2004; Thomas et al., 2002).

Indeed, in the Zgounder Mine Region, similar volcanic activity of this type can be bracketed between 620 Ma to 550 Ma (Pelletier et al., 2016; Thomas et al., 2002; This study). For the rhyolite (Zg-106), Pelletier et al., (2016) reported mean age of  $578 \pm 4$  Ma from the Zgounder Mine for the rhyolitic dikes and plugs using the  $^{207}\text{Pb}/^{206}\text{Pb}$  ages. Moreover, in the Sirwa massif, similar U-Pb ages of  $579 \pm 7$  Ma,  $571 \pm 8$  Ma,  $577 \pm 6$  Ma,  $579 \pm 7$ , and  $575 \pm 8$  Ma were proposed for the Tourcht diorite, the Tikhfist rhyolite (Tiouin Subgroup, Fig. 1C), the Aguin member (Tafrant Subgroup), the Tilsakht granite, and the Askaoun granodiorite, respectively (Thomas et al., 2002). Given that the  $575 \pm 3$  Ma age of our rhyolite is analytically identical within errors to the ages of these rocks, thus inferring a rapid sequence of intrusive events that occurred within a span of a few million years.

For the granite sample (Zg-119); the obtained age of  $564 \pm 2$  Ma is also identical within a margin of error to the ages of the neighbouring Imourkhsen granite dated respectively at  $561 \pm 3$  Ma, and  $562 \pm 5$  Ma by Toummite et al., (2013), and Thomas et al., (2002) (Fig. 1C). The Imourkhsen granite on its turn intrudes the lower and older part of the Ouarzazate Group in the Sirwa massif (Thomas et al., 2002). Additionally, in the Sirwa massif, numerous syn- to late-Ouarzazate Group granites with a sub-alkaline-calcic composition provided ages of c. 560 Ma, making them the Ouarzazate Group's youngest components. According to Thomas et al., (2002), these granites belong to the Achkouchi Complex (Fig. 1C), and grouped into the Amassine Suite (e.g., Bou-Tazart, Aït Nabdas, and Tikitar granites, and the Tazoult Quartz-porphyry at  $559 \pm 6$  Ma).

Significant inherited Paleoproterozoic zircon population are previously reported for the Ouarzazate Group rocks all over the Anti-Atlas. For instance, Baidada et al., (2019) reported inherited Paleoproterozoic signature for the Saghro massif granitoids. Blein et al., 2014b proved the existence of Paleoproterozoic inherited zircon in ignimbrite of the Ouarzazate Group in the Agadir Melloul area. Finally, Thomas et al., (2002) highlighted Paleoproterozoic inherited zircons in syn-Ouarzazate Group granites in the Sirwa massif.

Indeed, the Ouarzazate Group's thick successions of volcano-sedimentary series are dominated by acidic and intermediate high-K calc-alkaline to shoshonitic volcanism (Blein et al., 2014b; Toummite et al., 2013; Walsh et al., 2012; Gasquet et al., 2008, 2005; Benziane, 2007; Thomas et al., 2004; El Baghdadi et al., 2003). Their depositional environment as pull-apart basins with strike-slip faulting conditions and sub-vertical movements favored a high variability in thickness (Walsh et al.,



2012, and references therein). Nevertheless, a contemporaneous magmatic activity spanned the 630 to 538 Ma time frame; (Table 1 in Hefferan et al., (2014) for reported precision ages from selected inliers of the Anti-Atlas Mountains). All in all, this activity indicates a prolonged tectono-magmatic event emplaced over multiple pulses over the whole Anti-Atlas belt (Tuduri et al., 2018). In regard to this, Schulte et al., (2022), considered the Ouarzazate Group in the Central and Eastern Anti-Atlas as the relicts of an Ediacaran silicic large igneous province (SLIP) deposited in a strictly continental environment. These huge volumes of mostly felsic magma were emplaced by multiple pulses and occur as a result of a long-lived magmatic event evolving from high-K calc-alkaline at 575–550 Ma to alkaline affinity at 550–540 Ma (Schulte et al., 2022; Blein et al., 2014b; Gasquet et al., 2008). This magmatism is considered to belong to a continental silicic large igneous province (SLIP), referred to as the Ouarzazate Silicic Large Igneous Province (OSLIP), and emplaced over multiple periods at ca. 575 Ma, ca. 560 Ma, and ca. 550 Ma (Tuduri et al., 2018; Blein et al., 2014b). Consequently, the last two pulses at the final stage of the Pan-African orogeny (560 to 550 Ma) appear linked to widespread pervasive hydrothermal activity across the whole Anti-Atlas (Tuduri et al., 2018). Regional correlations can be drawn to the extent of the Cadomian orogeny (Linnemann et al., 2014, and references therein). Hence, our samples fall within the age range of 580 to 550 Ma of the Cadomian arc magmatism extended to Iberia (Chichorro et al., 2022, and references therein).

### 5.3.2 The Saghro Group detrital age: depositional style and material source

Whether or not the Paleoproterozoic basement exists in the Sirwa massif north of the AAMF, and by consequence the northern margin of the WAC is still debated (Ennih and Liégeois, 2008). Outcrops of this Paleoproterozoic basement have been regarded as being present exclusively in the westernmost part of the Anti-Atlas belt (Choubert, 1963). However, new studies based on TDM ages support the hypothesis that Paleoproterozoic rocks may also be found in both the Central and Eastern segments of the Anti-Atlas (Baidada et al., 2019; Blein et al., 2014; Toummite et al., 2013; Liégeois et al., 2013; Abati et al., 2010; Gasquet et al., 2008; Thomas et al., 2002). Moreover, this hypothesis can be extended to Western Meseta (Pereira et al., 2015, and references therein; Tahiri et al., 2010; Baudin et al., 2003).

During the last decade, the northern boundary of the WAC is considered to be marked by the northernmost outcrops of highly deformed rocks in the southern part of the Bou-Azzer inlier, particularly the Tazagzaout migmatites and gneisses, based on similarities in lithology and deformation degree with the Zenaga Complex in the Western Anti-Atlas (Leblanc and Lancelot, 1980). However, this view has been changed owing to the new U-Pb precision dating obtained from the Tazagzaout gneisses ( $752 \pm 12$  Ma; D'Lemos et al., (2006), and the Oumlil granite  $741 \pm 9$  Ma; El Hadi et al., (2010)). Furthermore, the positive Nd values of (+ 4.9 to + 6) for the Tazagzaout Complex refer to a juvenile depleted mantle source, not akin to the 2 Ga Eburnean WAC basement (D'Lemos et al., 2006). Consequently, the presence of a WAC basement beneath the Central Anti-Atlas, especially in the Sirwa massif is not clear. Published geochronological data indicate that both the Saghro and Bou Salda groups were deposited approximately 630 to 610 Ma. This deposition occurred during a period of tectonic convergence of the Cadomian arc upon the WAC Iriri-Tazagzaout Complex (Errami et al., 2021a; Walsh et al., 2012; El Hadi et al., 2010). Yet, the precise location of the suture zone marking this collision remains ambiguous. Current interpretations suggest the suture



likely corresponds to the Anti-Atlas Major Fault (AAMF) (Hefferan et al., 2014), potentially extending north along the South Atlas Fault (SAF) (Ennih and Liégeois, 2001, 2008).

Detrital zircon age from our study provides new insights into the basement beneath the Sirwa massif. Sample (Zg-132) from the Imghi Formation of the Saghro Group returned exclusively Paleoproterozoic ages, with a prominent peak at ca. 2100 Ma (Fig. 4-3). Interestingly, no ages younger than 1600 Ma were found in our sample, ~~nor were any zircons dating to the local~~  
~~Pan-African magmatic period in the Anti-Atlas identified. These~~ 883 - 640 Ma Pan-African younger zircons, which are common in outcrops of the Sirwa inlier and have been consistently reported in Saghro Group sediments (Letsch et al., 2018; Abati et al., 2010) are absent in our sample. ~~Indeed, this Paleoproterozoic peak goes in line with the inherited signature from the analyzed zircon population of sediments of the Saghro and Bou Salda groups from the Sirwa massif, for which the obtained maximum depositional ages cluster around 620 – 610 Ma (Abati et al., 2010). Arguably, the~~  
 exposure of cratonic basement (Paleoproterozoic-?) based on the relatively high proportion of the 610 Ma zircons in regard to Paleoproterozoic zircons in the upper levels of the stratigraphy sequence. ~~Therefore,~~ this suggests that the source of the 610 Ma was eroded favoring the enrichment in Paleoproterozoic ages. Admittedly, the subsequent erosion of the underlying Neoproterozoic rocks (notably synchronous magmatic rocks, and Saghro and Bou Salda groups) might be the source for the prominent 610 Ma peak in the Iberian massif (Chichorro et al., 2022); (Fig. 13A).

The mono-peak at 2.1 Ga can only be accepted to strictly represent Paleoproterozoic. It can be interpreted as representing the material source for the Saghro Group sedimentary units only in the study area (Fig. 13A). Indeed, the returned mono zircon population may reflect insufficient sampling of detrital zircons. However, the number of analyzed zircons (up to 139; see supplementary table 5) is considered adequate to address paleogeographic questions and sediment source areas. In this context, we interpret the Paleoproterozoic mono-peak in our sample to reflect local exposure of Paleoproterozoic basement rocks along the basin margins of the Saghro Group ~~in the study area~~ (Fig. 13A). Consequently, most sediments were derived exclusively from the erosion of these basement rocks in a possible mono Paleoproterozoic paleo-relief without interaction with Cryogenian sediments.

Overall, this evidence argues that during Ediacaran times, the Paleoproterozoic basement was in fact totally or locally exposed in the Sirwa inlier (Fig. 13A). This interpretation is further corroborated by Nd model ages of Ediacaran magmatism from this study ~~(see section Sm-Nd), which yield TDM age of Mesoproterozoic values,~~ indicating a mixing/recycling of older Paleoproterozoic crust with juvenile Ediacaran magma. All in all, and based on these findings, the WAC crust extends beneath the Sirwa massif and likely continues northward far beyond the Anti-Atlas belt. Notably, Paleoproterozoic rhyolites have been reported in the Meseta Block, north of the Anti-Atlas, with a given age of  $2050.6 \pm 3$  Ma (Pereira et al., 2015). These findings do support the extension of the WAC Paleoproterozoic crust northward beyond the AAMF, which was previously considered the northern margin of the craton.

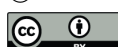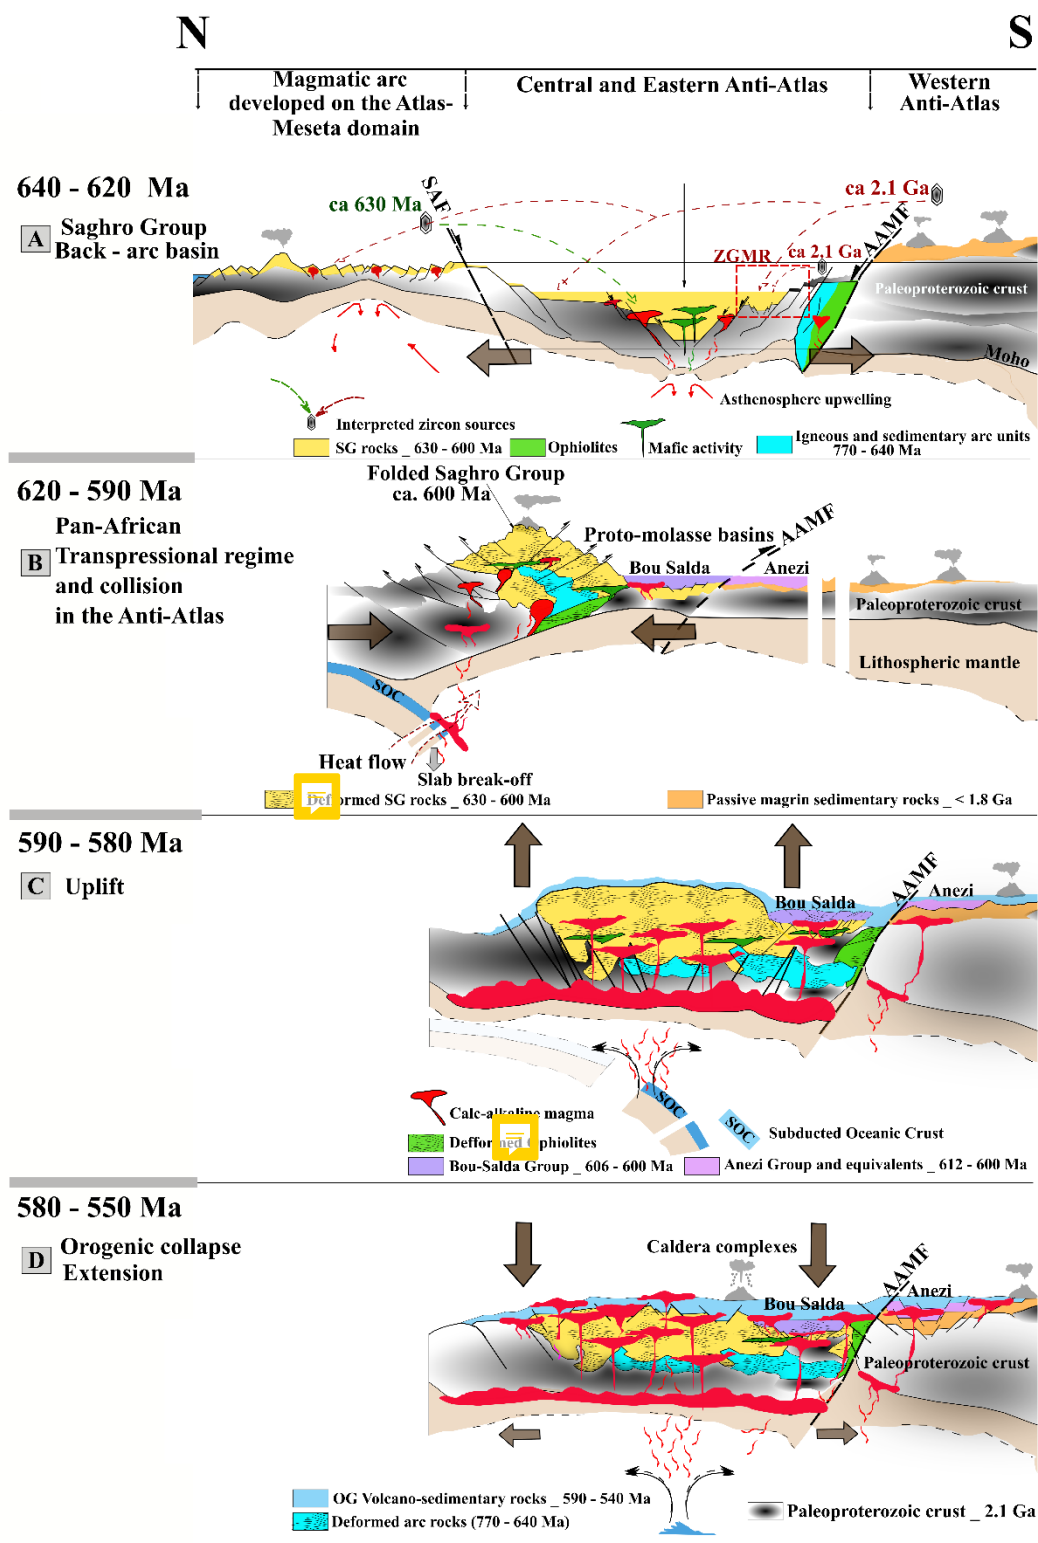

Figure 13: Reconstruction of the geotectonic setting of Saghro Group and Ouarzazate Group during Ediacaran times. (resembled and modified after El Kabouri et al., 2025; Chichorro et al., 2022; Errami et al., 2021a; Abati et al., 2010; Thomas et al., 2002). (A): Saghro Group deposition in a back-arc basin (This study; Ouguir et al., 1996), implying local exposure of the 2.1 Ga Paleoproterozoic crust in the Zgounder Mine Region (This study). (B): Pan-African transpressional regime and collision in the Anti-Atlas, resulting in Saghro Group folding, injection of the 600 Ma calc-alkaline magma (Errami et al., 2021a), and proto molasses basin formation (Thomas et al., 2002). (C): General uplift in the Anti-Atlas. (D): Orogenic collapse favoring the thick Ouarzazate Group sedimentation (e.g. post-tectonic molasse deposition and calc-alkaline magmatism, with coeval acidic rocks).

## 6 Conclusions

In the light of the above, the following conclusions can be drawn:

- i. Based on geochemical proxies (major and trace elements), the Saghro Group rocks exhibit both active continental margins and within-plate characteristics. A dual signature characteristic of magmas generated during back-arc extension. Therefore, the recognized subduction-related signature on our samples is acquired through mantle metasomatism by sediment-derived components during arc activity, while the within-plate signature emerges later during back-arc extension processes.
- ii. The Saghro Group rocks were emplaced at the early stages of back-arc basin opening, testified by their calc-alkaline affinity, geochemical characteristics and regional correlations. They were derived from contaminated mantle source with an old continental crust. Further, their  $\epsilon\text{Nd}$  (at 620 Ma) = + 3.2 to + 4.5, and TDM ages of 1431 – 1197 Ma reflects a mixed origin, combining mostly mantle-derived magma with limited proportion of older crustal material. Thus admitting the existence of an old Paleoproterozoic to even Mesoproterozoic crust under the Saghro Group.
- iii. For the Ouarzazate Group rocks, the evolution in chemical compositions for the suite of high-K calc-alkaline to shoshonitic rocks is controlled in the most part by fractional crystallization and crustal contamination. They were deposited in a post-collisional setting, and their primary magma was sourced from an enriched continental lithospheric mantle, previously underwent metasomatism by fluids from former Neoproterozoic subduction. Further, their  $\epsilon\text{Nd}$  (at 570 Ma) = - 0.9 to + 1.1, and TDM ages of 1526 to 1252 Ma refer to a Mesoproterozoic (and Paleoproterozoic) affinity, implying recycling of Paleoproterozoic material during Ediacaran times.
- iv. LA-ICP-MS U-Pb zircon ages on magmatic rocks evince an expression of a post-collisional syn-orogenic magmatism (WACadomian arc), during the emplacement of its first and second pulses at ca. 575 to 560 Ma. This period of magmatism is concordant with a Silicic Large Igneous Province (SLIP) recognized all over the Anti-Atlas.

## 640 Code, data, or code and data availability

Data will be made available upon request.



## Supplement link

## Author contributions

**Abdelhay Ben-Tami:** Field work, Sampling and preparation, Thin-sections preparation, Investigation, Data visualization, Data curation, Formal analysis, Writing of original draft, Finalization. **Said Belkacim:** Supervision, Resources, Writing - review and editing. **Jamal El Kabouri:** Data visualization, Writing of original draft. Review and editing. **Joshua H.F.L. Davies and Morgann G. Perrot:** LA-ICP-MS U-Pb data and methodology, writing of original draft, review and editing. **Mariam Ferraq:** Data curation and visualization. **Mohamed Bouabdellah:** review and editing. **Bouchra Baidada, Mohamed Bhilisse and Mohamed Assalmi:** Resources, accommodation, field trips, hosting. **David Lalonde:** Resources, Financing, Collaboration. Review, and validation.

## Competing interests

The authors declare that they have no conflict of interest. Corresponding author (Abdelhay Ben-Tami), discloses an employment relationship with the Zgounder Millenium Silver Mining Company (ZMSM).

## Disclaimer

Copernicus Publications remains neutral with regard to jurisdictional claims made in the text, published maps, institutional affiliations, or any other geographical representation in this paper. While Copernicus Publications makes every effort to include appropriate place names, the final responsibility lies with the authors. Views expressed in the text are those of the authors and do not necessarily reflect the views of the publisher.

## Acknowledgements

This research represents a component of the corresponding author's thesis project. The authors express their sincere gratitude to the **Zgounder Millenium Silver Mining Company (ZMSM)**, the Moroccan subsidiary of **Aya Gold and Silver (AYA)**, for their essential financial support for this study, as well as for providing accommodation and logistical assistance. Special appreciation is extended to the Exploration geology team at the Zgounder Mine for their valuable facilitation and support during field operations. Official permission to publish this work was granted by **David Lalonde, P. Geo / VP Exploration / Aya Gold and Silver Inc.** Finally, the authors wish to thank the anonymous referees for their constructive feedback and suggestions, which significantly enhanced the quality of this manuscript.



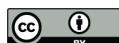

## Financial support

Financial support for the Whole-rock analysis, Sm-Nd isotopes, U-Pb on zircon, fieldwork and accommodation was guaranteed by the **Zgounder Millenium Silver Mining company (ZMSM)**; the Moroccan branch of **Aya Gold and Silver Inc.**

## 670 Review statement

## References

- Abati, J., Aghzer, A. M., Gerdes, A., & Ennih, N.: Detrital zircon ages of Neoproterozoic sequences of the Moroccan Anti-Atlas belt. *Precambrian Research*, 181(1-4), 115–128, <https://doi.org/10.1016/j.precamres.2010.05.018>, 2010.
- Admou, H., Fekkak, A., Razin, P., Egal, E., Youbi, N., Soulaïmani, A., Blein, O., Baudin, T., Chevremont, P.: Carte géologique Maroc (1/50 000), feuille d'Aït Ahmane– Notes et Mémoires Service Géologique Maroc, no. 533, 2012.
- 675 Ait Lahna, A., Youbi, N., Tassinari, C.C.G., Basei, M.A.S., Ernst, R.E., Chaib, L., Barzouk, A., Mata, J., Gartner, A., Admou, H., Boumehdi, M.A., Söderlund, U., Bensalah, M.K., Bodinier, J.L., Maacha, L., Bekker, A.: Revised stratigraphic framework for the lower Anti-Atlas supergroup based on U–Pb geochronology of magmatic and detrital zircons (Zenaga and Bou Azzer-El Graara inliers, Anti-Atlas Belt, Morocco). *Journal of African Earth Sciences*. 171, 103946, <https://doi.org/10.1016/j.jafrearsci.2020.103946>, 2020.
- 680 Aït Malek, A., Gasquet, D., Bertrand, J.M., Leterrier, J. : Géochronologie U-Pb sur zircon de granitoïdes éburnéens et panafricains dans les boutonnières protérozoïques d'Igherm, du Kerdous et du Bas Drâa (Anti-Atlas occidental, Maroc). *Comptes. Rendus. l'Académie des Sciences-Series. IIA–Earth and Planetary Science*. 327 (12), 819–826, [https://doi.org/10.1016/S1251-8050\(99\)80056-1](https://doi.org/10.1016/S1251-8050(99)80056-1), 1998.
- 685 Aldanmaz, E., Yaliniz, M. K., Guctekin, A., & Goncuoglu, M. C.: Geochemical characteristics of mafic lavas from the Neotethyan ophiolites in western Turkey: implications for heterogeneous source contribution during variable stages of ocean crust generation. *Geological Magazine*, 145(1), 37–54, <https://doi.org/10.1017/S0016756807003986>, 2008.
- Álvaro, J.J., Benziane, F., Thomas, R., Walsh, G.J., Yazidi, A.: Neoproterozoic–Cambrian stratigraphic framework of the Anti-Atlas and Ouzellagh promontory (High Atlas), Morocco. *Journal of African Earth Sciences*. 98, 19–33, <https://doi.org/10.1016/j.jafrearsci.2014.04.026>, 2014.
- 690 Álvaro, J. J., Pouclet, A., Ezzouhairi, H., Soulaïmani, A., Bouougri, E. H., Imaz, A. G., and Fekkak, A.: Early Neoproterozoic rift-related magmatism in the Anti-Atlas margin of the West African craton, Morocco. *Precambrian Research*, 255, 433–442, <https://doi.org/10.1016/j.precamres.2014.10.008>, 2014b.
- Baidada, B., Ikenne, M., Barbey, P., Soulaïmani, A., Cousens, B., Haissen, F., Ilmen, Said, Alansari, A.: SHRIMP U–Pb zircon geochronology of the granitoids of the Imiter Inlier: constraints on the Pan-African events in the Saghro massif, Anti-Atlas (Morocco). *Journal of African Earth Sciences*, 150, 799–810, <https://doi.org/10.1016/j.jafrearsci.2018.10.008>, 2019.

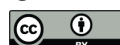

- Baidada, B., Cousens, B., Alansari, A., Soulaïmani, A., Barbey, P., Ilmen, S., & Ikenne, M.: Geochemistry and Sm–Nd isotopic composition of the Imiter Pan-African granitoids (Saghro massif, eastern Anti-Atlas, Morocco): Geotectonic implications. *Journal of African Earth Sciences*, 127, 99–112, <https://doi.org/10.1016/j.jafrearsci.2016.08.016>, 2017.
- 700 Bajja, A.: Volcanisme syn à post orogénique du Néoprotérozoïque de l’Anti-Atlas: implications pétrogénétiques et géodynamiques. In: de Wall H., Greiling R.P. (Eds.), *Magmatic Evolution of a Neoproterozoic Island-Arc Syn- to Postorogenic Igneous Activity in the Anti-Atlas (Morocco)*. Forschungszentrum Jülich GmbH 45, pp. 9–228, 2001.
- Barbey, P., Nachit, H., and Pons, J.: Magma–host interactions during differentiation and emplacement of a shallow-level, zoned granitic pluton (Tarçouate pluton, Morocco): implications for magma emplacement. *Lithos*, 58(3-4), 125-143, [https://doi.org/10.1016/S0024-4937\(01\)00053-6](https://doi.org/10.1016/S0024-4937(01)00053-6), 2001.
- 705 Baudin, T., Chèvremont, P., Razin, P., Youbi, N., Andries, D., Hoëpfner, C., and Tegye, M.: Carte géologique du Maroc au 1/50 000, feuille de Skhour des Rehamna, Mémoire explicatif. Notes Mémoires Services Géologiques. Maroc, 435, 114, 2003.
- Belkacim, S., Gasquet, D., Liégeois, J.-P., Arai, S., Gahlan, H. A., Ahmed, H., Ikenne, M.: The Ediacaran volcanic rocks and associated mafic dykes of the Ouarzazate Group (Anti-Atlas, Morocco): Clinopyroxene composition, whole-rock
- 710 geochemistry and Sr–Nd isotopes constraints from the Ouzellarh–Siroua salient (Tifnoute valley). *Journal of African Earth Sciences*, 127, 113–135, <https://doi.org/10.1016/j.jafrearsci.2016.08.002>, 2017.
- Ben-Tami, A., Belkacim, S., Baidada, B., El Kabouri, J., Assalmi, M., Bhlisse, M., and Bouabdellah, M.: Lithostratigraphy, Whole-Rock, and Sm–Nd Isotopic Data of the Ediacaran Magmatic Rocks from the Zgounder Ag–Hg Deposit (Siroua Massif, Central Anti-Atlas, Morocco). In *international conference on Mediterranean Geosciences Union* (pp. 167-171). Cham: Springer Nature Switzerland, [https://doi.org/10.1007/978-3-031-48758-3\\_38](https://doi.org/10.1007/978-3-031-48758-3_38), 2024.
- 715 Benziane, F., Yazidi, A., Saadane, A., Yazidi, M., El Fahssi, A., Stone, B. D., and Ejjaouani, H.: Carte géologique du Maroc au 1/50 000, feuille KELÂAT M’GOUNA–Notice explicative. Notes Mémoires Service Géologique Maroc, 468, 136, 2008.
- Benziane, F.: Lithostratigraphie et évolution géodynamique de l’Anti-Atlas (Maroc) du Paléoprotérozoïque au Néoprotérozoïque: exemples de la boutonnière de Tagragra de Tata et du Jbel Saghro. Thèse de doctorat, Université de Savoie
- 720 CISM, Chambéry, France. 321 pp, 2007.
- Beraaouz, E. H., Ikenne, M., Mortaji, A., Madi, A., Lahmam, M., & Gasquet, D.: Neoproterozoic granitoids associated with the Bou-Azzer ophiolitic melange (Anti-Atlas, Morocco): evidence of adakitic magmatism in an arc segment at the NW edge of the West-African craton. *Journal of African Earth Sciences*, 39(3-5), 285-293, <https://doi.org/10.1016/j.jafrearsci.2004.07.040>, 2004.
- 725 Blein, O., Baudin, T., Chèvremont, P., Soulaïmani, A., Admou, H., Gasquet, P., ... Gombert, P.: Geochronological constraints on the polycyclic magmatism in the Bou Azzer–El Graara inlier (Central Anti-Atlas Morocco). *Journal of African Earth Sciences*, 99, 287–306, <https://doi.org/10.1016/j.jafrearsci.2014.04.021>, 2014.
- Blein, O., Baudin, T., Soulaïmani, A., Cocherie, A., Chèvremont, P., Admou, H., ... Roger, J.: New geochemical, geochronological and structural constraints on the Ediacaran evolution of the south Sirwa, Agadir–Melloul and Iguerda inliers,
- 730 Anti-Atlas, Morocco. *Journal of African Earth Sciences*, 98, 47–71, <https://doi.org/10.1016/j.jafrearsci.2014.06.019>, 2014b.

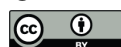

- Bouougri, E. H., Aït Lahna, A., Tassinari, CCG., Basei, MAS., Youbi, N., Admou, H., Saquaque, A., Boumehdi, A., Maacha, L.: Time constraints on early Tonian Rifting and Cryogenian Arc terrane-continent convergence along the northern margin of the West African craton: Insights from SHRIMP and LA-ICP-MS zircon geochronology in the Pan-African Anti-Atlas belt (Morocco). *Gondwana Research*. 85:169-188, <https://doi.org/10.1016/j.gr.2020.03.011>, 2020.
- 735 Boynton, W. V.: Cosmochemistry of the rare earth elements: meteorite studies. *In* *Developments in geochemistry*, Elsevier, (Vol. 2), (pp. 63-114), <https://doi.org/10.1016/B978-0-444-42148-7.50008-3>, 1984.
- Chichorro, M., Solá, A. R., Bento dos Santos, T. M., Lains Amaral, J., & Crispim, L.: Cadomian/Pan-African consolidation of the Iberian Massif assessed by its detrital and inherited zircon populations: is the ~610Ma age peak a persistent Cadomian magmatic inheritance or the key to unravel its Pan-African basement? *Geologica acta*, 20, 1-29, <https://doi.org/10.1344/GeologicaActa2022.20.15>, 2022.
- 740 Choubert, G.: Essai de mise au point du problème des “ignimbrites”. *Bulletin Volcanologique*, 25(1), 123-140, <https://doi.org/10.1007/BF02596545>, 1963.
- Cousens, B.L.: Magmatic evolution of Quaternary mafic magmas at Long Valley Caldera and the Devils Postpile, California: effects of crustal contamination on lithospheric mantle-derived magmas. *Journal of Geophysical Res.* 101, <https://doi.org/10.1029/96JB02093>, 27 673–27 689, 1996.
- 745 De Beer, C.H., Chevallier, L.P., De Kock, G.S., Gresse, P.G., Thomas, R.J.: Notice Explicative de la Carte Géologique du Maroc au 1/50 000 feuille Sirwa. *Notes et Mémoires Service Géologique. Maroc* 395, 86, 2000.
- De Paolo, D.J.: Trace element and isotopic effects of combined wall-rock assimilation and fractional crystallization. *Earth and Planetary Science Letters*. 53, 189–202, [https://doi.org/10.1016/0012-821X\(81\)90153-9](https://doi.org/10.1016/0012-821X(81)90153-9), 1981.
- 750 D’Lemos, R. S., Inglis, J. D., and Samson, S. D.: A newly discovered orogenic event in Morocco: Neoproterozoic ages for supposed Eburnean basement of the Bou Azzer inlier, Anti-Atlas Mountains. *Precambrian Research*, 147(1-2), 65–78, <https://doi.org/10.1016/j.precamres.2006.02.003>, 2006.
- Eby, G.N.: The A-type granitoids: a review of their occurrence and chemical characteristics and speculations on their petrogenesis. *Lithos*. 26, 115–134, [https://doi.org/10.1016/0024-4937\(90\)90043-Z](https://doi.org/10.1016/0024-4937(90)90043-Z), 1990.
- 755 El Baghdadi, M., El Boukhari, A., Jouider, A., Benyoucef, A., Nadem, S.: Calc-alkaline arc I-type granitoid associated with S-type granite in the Pan-African belt of eastern Anti-Atlas (Saghro and Ougnat, South Morocco). *Gondwana Research*. 6 (4), 557–572, [https://doi.org/10.1016/S1342-937X\(05\)71007-8](https://doi.org/10.1016/S1342-937X(05)71007-8), 2003.
- El Bahat, A., Ikenne, M., Cousens, B., Söderlund, U., Ernst, R., Klausen, M. B., and Youbi, N.: New constraints on the geochronology and Sm-Nd isotopic characteristics of Bas-Drâa mafic dykes, Anti-Atlas of Morocco. *Journal of African Earth Sciences*, 127, 77-87, <https://doi.org/10.1016/j.jafrearsci.2016.09.003>, 2017.
- 760 El Hadi, H., Simancas, J.F., Martínez-Poyatos, D., Azor, A., Tahiri, A., Montero, P., Fanning, C.M., Bea, F., Gonzalez-Lodeiro, F.: Structural and geochronological constraints on the evolution of the Bou Azzer Neoproterozoic ophiolite (Anti-Atlas, Morocco). *Precambrian Research*. 182 (1–2), 1–14, <https://doi.org/10.1016/j.precamres.2010.06.011>, 2010.



- El Haibi, H., Hadi, H. E., Tahiri, A., Poyatos, D. M., Gasquet, D., Pérez-Cáceres, I., and Mehdioui, S.: Geochronology and isotopic geochemistry of Ediacaran high-K calc-alkaline felsic volcanism: an example of a Moroccan perigondwanan (Avalonian?) remnant in the El Jadida horst (Mazagonia). *Journal of African Earth Sciences*, 163, 103669, <https://doi.org/10.1016/j.jafrearsci.2019.103669>, 2020.
- El Kabouri, J., Triantafyllou, A., Errami, E., Belkacim, S., Calassou, E., Zouicha, A., and Linnemann, U.: Revising the lithostratigraphic framework of the Ediacaran succession of the Anti-Atlas belt: correlation across the Cadomian domain of the West African Craton. *Journal of African Earth Sciences*, 105696, <https://doi.org/10.1016/j.jafrearsci.2025.105696>, 2025.
- Ennih, N., and Liégeois, J. P.: The boundaries of the West African craton, with special reference to the basement of the Moroccan metacratonic Anti-Atlas belt. *Geological Society, London, Special Publications*, 297(1), 1–17, <https://doi.org/10.1144/SP297.1>, 2008.
- Ennih, N., and Liégeois, J.P.: The Moroccan Anti-Atlas: the West African craton passive margin with limited Pan-African activity. Implications for the northern limit of the craton. *Precambrian Research*. 112 (3–4), 289–302, [https://doi.org/10.1016/S0301-9268\(01\)00195-4](https://doi.org/10.1016/S0301-9268(01)00195-4), 2001.
- Errami, E., Linnemann, U., Hofmann, M., Gärtner, A., Zieger, J., Gärtner, J., Mende, K., El Kabouri, J., Gasquet, D., Ennih, N.: From pan-african transpression to cadomian transtension at the west african margin: New U-Pb zircon ages from the eastern saghro inlier (anti-atlas, Morocco). *Geological Society. Special Publications*. 503, 209–233, <https://doi.org/10.1144/SP503-2020-105>, 2021a.
- Errami, E., Bonin, B., Laduron, D., Lasri, L.: Petrology and geodynamic significance of the post-collisional Pan-African magmatism in the Eastern Saghro area (Anti-Atlas, Morocco). *Journal of African Earth Sciences*. 55 (1–2), 105–124, <https://doi.org/10.1016/j.jafrearsci.2009.02.006>, 2009.
- Fekkak, A., Pouclet, A., & Benharref, M.: The middle Neoproterozoic sidi flah group (Anti-Atlas, Morocco): syn-rift deposition in a Pan-African continent/ocean transition zone. *Journal of African Earth Sciences*, 37(1-2), 73–87, [https://doi.org/10.1016/S0899-5362\(03\)00049-6](https://doi.org/10.1016/S0899-5362(03)00049-6), 2003.
- Fekkak, A., Pouclet, A., Ouguir, H., Ouazzani, H., Badra, L., Gasquet, D.: Géochimie et signification géotectonique des volcanites du Cryogénien inférieur du Saghro (Anti-Atlas oriental, Maroc) /Geochemistry and geotectonic significance of Early Cryogenian volcanics of Saghro (Eastern Anti-Atlas, Morocco). *Geodinamica. Acta*, 14 (6), 373–385, <https://doi.org/10.1080/09853111.2001.10510730>, 2001.
- Frost, B. R., Barnes, C. G., Collins, W. J., Arculus, R. J., Ellis, D. J., and Frost, C. D.: A geochemical classification for granitic rocks. *Journal of petrology*, 42(11), 2033–2048, <https://doi.org/10.1093/petrology/42.11.2033>, 2001.
- Garfunkel, Z.: The relations between Gondwana and the adjacent peripheral Cadomian domain—constraints on the origin, history, and paleogeography of the peripheral domain. *Gondwana Research*, 28(4), 1257–1281, <https://doi.org/10.1016/j.gr.2015.05.011>, 2015.



- Gasquet, D., Ennih, N., Liégeois, J.P., Soulaïmani, A., Michard, A.: The Pan-African Belt. In: Michard, A., Saddiqi, O., Chalouan, A., Frizon de Lamotte, D. (Eds.), *Continental evolution: the geology of Morocco*. *Lect. Notes Earth Sci.* 116, 33–64, [https://doi.org/10.1007/978-3-540-77076-3\\_2](https://doi.org/10.1007/978-3-540-77076-3_2), 2008.
- Gasquet, D., Levresse, G., Cheilletz, A., Azizi-Samir, M. R., and Mouttaqi, A.: Contribution to a geodynamic reconstruction of the Anti-Atlas (Morocco) during Pan-African times with the emphasis on inversion tectonics and metallogenic activity at the Precambrian–Cambrian transition. *Precambrian Research*, 140(3–4), 157–182, <https://doi.org/10.1016/j.precamres.2005.06.009>, 2005.
- Gasquet, D., Chevremont, P., Baudin, T., Chalot-Prat, F., Guerrot, C., Cocherie, A., and Cheilletz, A.: Polycyclic magmatism in the *tagragra d'akka and kerdous-tafeltast* inliers (western Anti-Atlas, Morocco). *Journal of African Earth Sciences*, 39(3–5), 267–275, <https://doi.org/10.1016/j.jafrearsci.2004.07.062>, 2004.
- Goldstein, S. L., O'nions, R. K., and Hamilton, P. J.: A Sm–Nd isotopic study of atmospheric dusts and particulates from major river systems. *Earth and Planetary Science Letters*, 70(2), 221–236, [https://doi.org/10.1016/0012-821X\(84\)90007-4](https://doi.org/10.1016/0012-821X(84)90007-4), 1984.
- Gresse, P.G., De Beer, C.H., Chevallier, L.P., De Kock, G.S., Thomas, R.J. : Notice Explicative de la Carte Géologique du Maroc au 1/50 000 feuille Tachoukacht. Notes et Mémoires Service Géologique. Maroc 393, 106, 2000.
- Hastie, A.R., Kerr, A.C., Pearce, J.A., Mitchell, S.F.: Classification of altered volcanic island arc rocks using immobile trace elements: development of the Th–Co discrimination diagram. *Journal of Petrology*. 48 (12), 2341–2357, <https://doi.org/10.1093/ petrology/egm062>, 2007.
- Hefferan, K., Soulaïmani, A., Samson, S. D., Admou, H., Inglis, J., Saquaque, A., ... Heywood, N.: A reconsideration of Pan African orogenic cycle in the Anti-Atlas Mountains, Morocco. *Journal of African Earth Sciences*, 98, 34–46, <https://doi.org/10.1016/j.jafrearsci.2014.03.007>, 2014.
- Hefferan, K., Samson, S., Hietpas, J., Admou, H., Inglis, J., Saquaque, A., & Heywood, N.: A ~ 604 Ma depositional age for the Tiddiline conglomerate, Bou Azzer inlier, Morocco based on U–Pb dating of detrital zircon. *Geol. Soc. Am.*, 44, 285, 2012.
- Hodel, F., Triantafyllou, A., Berger, J., Macouin, M., Baele, J.M., Mattielli, N., Monnier, C., Trindade, R.I.F., Ducea, M.N., Chatir, A., Ennih, N., Langlade, J., Poujol, M.: The Moroccan Anti-Atlas ophiolites: Timing and melting processes in an intra-oceanic arc-back-arc environment. *Gondwana Research*. 86, 182–202, <https://doi.org/10.1016/j.gr.2020.05.014>, 2020.
- Hofmann, A. W., Jochum, K. P., Seufert, M., and White, W. M.: Nb and Pb in oceanic basalts: new constraints on mantle evolution. *Earth and Planetary science Letters*, 79(1–2), 33–45, [https://doi.org/10.1016/0012-821X\(86\)90038-5](https://doi.org/10.1016/0012-821X(86)90038-5), 1986.
- Hooper, P.R., Bailey, D.G., McCarley Holder, G.A.: Tertiary calc-alkaline magmatism associated with lithospheric extension in the Pacific Northwest. *J. Geophysical Research*. 100 (B6), <https://doi.org/10.1029/94JB03328>, 10,303–10,319, 1995.
- Horstwood, M. S., Košler, J., Gehrels, G., Jackson, S. E., McLean, N. M., Paton, C., ... and Schoene, B.: Community-derived standards for LA-ICP-MS U-(Th-) Pb geochronology—Uncertainty propagation, age interpretation and data reporting. *Geostandards and Geoanalytical Research*, 40(3), 311–332, <https://doi.org/10.1111/j.1751-908X.2016.00379.x>, 2016.



- Ikenne, M., Söderlund, U., Ernst, R. E., Pin, C., Youbi, N., El Aouli, E. H., and Hafid, A.: A c. 1710 Ma mafic sill emplaced  
 830 into a quartzite and calcareous series from Ighrem, Anti-Atlas – Morocco: Evidence that the Taghdout passive margin  
 sedimentary group is nearly 1 Ga older than previously thought. *Journal of African Earth Sciences*. 127, 62–76,  
<https://doi.org/10.1016/j.jafrearsci.2016.08.020>, 2017.
- Inglis, J.D., D’Lemos, R.S., Samson, S.D., Admou, H.: Geochronological constraints on Late Precambrian intrusion,  
 metamorphism, and tectonism in the anti-atlas mountains. *Journal of Geology*. 113, 439–450, <https://doi.org/10.1086/430242>,  
 835 2005.
- Karaoui, B., Breitzkreuz, C., Mahmoudi, A., Youbi, N., Hofmann, M., Gärtner, A., & Linnemann, U.: U–Pb zircon ages from  
 volcanic and sedimentary rocks of the Ediacaran Bas Draâ inlier (Anti-Atlas Morocco): Chronostratigraphic and provenance  
 implications. *Precambrian Research*. 263, 43–58, <https://doi.org/10.1016/j.precamres.2015.03.003>, 2015.
- Karaoui, B., Breitzkreuz, C., Mahmoudi, A., and Youbi, N.: Physical volcanology, geochemistry and basin evolution of the  
 840 Ediacaran volcano-sedimentary succession in the Bas Draâ inlier (Ouarzazate Supergroup, Western Anti-Atlas,  
 Morocco). *Journal of African Earth Sciences*. 99, 307–331, <https://doi.org/10.1016/j.jafrearsci.2014.06.022>, 2014.
- Large, R.R., Gemmell, J.B., Paulick, H., Huston, D.L.: The alteration box plot: a simple approach to understanding the  
 relationship between alteration mineralogy and lithogeochemistry associated with volcanic-hosted massive sulfide deposits.  
*Economic Geology*. 96 (5), 957–971, <https://doi.org/10.2113/gsecongeo.96.5.957>, 2001.
- 845 Laurent, O., Martin, H., Moyen J.F., Doucelance, R.: The diversity and evolution of late-Archean granites: Evidence for the  
 onset of a “modern-style” plate tectonics between 3.0 and 2.5 Ga. *Lithos*, 205, (pp. 208–235), <https://doi.org/10.1016/j.lithos.2014.06.022>, 2014.
- Leblanc, M., & Lancelot, J. R.: Interprétation géodynamique du domaine pan-africain (Précambrien terminal) de l’Anti-Atlas  
 (Maroc) à partir de données géologiques et géochronologiques. *Canadian Journal of Earth Sciences*, 17(1), 142–155,  
<https://doi.org/10.1139/e80-012>, 1980.
- 850 Letsch, D., Houicha, M. E., von Quadt, A., and Winkler, W.: missing link in the peri-Gondwanan terrane collage: the  
 Precambrian basement of the Moroccan Meseta and its lower Paleozoic cover. *Canadian Journal of earth sciences*, 55(1), 33–  
 51, <https://doi.org/10.1139/cjes-2017-0086>, 2018.
- Liégeois, J.P., Abdelsalam, M.G., Ennih, N., Ouabadi, A.: Metacraton: nature, genesis and behavior. *Gondwana Res.* 23 (1),  
 220–237, <https://doi.org/10.1016/j.gr.2012.02.016>, 2013.
- 855 Liégeois, J.P., Fekkak, A., Bruguier, O., Errami, E., Ennih, N.: The Lower Ediacaran (630–610 Ma) Saghro group: an orogenic  
 transgressive basin development during the early metacratonic evolution of the Anti-Atlas (Morocco). In:  P485 4th  
 meeting, Algiers, p. 57, 2006.
- Liégeois, J. P., Navez, J., Hertogen, J., and Black, R.: Contrasting origin of post-collisional high-K calc-alkaline and  
 shoshonitic versus alkaline and peralkaline granitoids. The use of sliding normalization. *Lithos*, 45(1–4), 1–28,  
 860 [https://doi.org/10.1016/S0024-4937\(98\)00023-1](https://doi.org/10.1016/S0024-4937(98)00023-1), 1998.





- Linnemann, U., Ovtcharova, M., Schaltegger, U., Gärtner, A., Hautmann, M., Geyer, G., and Smith, J.: New high-resolution age data from the Ediacaran–Cambrian boundary indicate rapid, ecologically driven onset of the Cambrian explosion. *Terra Nova*, 31(1), 49–58, <https://doi.org/10.1111/ter.12368>, 2019.
- Linnemann, U., Gerdes, A., Hofmann, M., Marko, L.: The Cadomian Orogen: Neoproterozoic to Early Cambrian crustal growth and orogenic zoning along the periphery of the West African Craton—Constraints from U–Pb zircon ages and Hf isotopes (Schwarzburg Antiform, Germany). *Precambrian Research*, 244, 236–278, <https://doi.org/10.1016/j.precamres.2013.08.007>, 2014.
- Marquez, A., Oyarzun, R., Doblas, M., and Verma, S. P.: Alkalic (ocean-island basalt type) and calc-alkalic volcanism in the Mexican volcanic belt: a case for plume-related magmatism and propagating rifting at an active margin?. *Geology*, 27(1), 51–54, [https://doi.org/10.1130/0091-7613\(1999\)027<0051:AOIBTA>2.3.CO;2](https://doi.org/10.1130/0091-7613(1999)027<0051:AOIBTA>2.3.CO;2), 1999.
- ~~T. Campbell~~ McCuaig, Kerrich, R., and Xie, Q.: Phosphorus and high field strength element anomalies in Archean high-magnesian magmas as possible indicators of source mineralogy and depth. *Earth and Planetary Science Letters*, 124(1–4), 221–239, [https://doi.org/10.1016/0012-821X\(94\)00088-3](https://doi.org/10.1016/0012-821X(94)00088-3), 1994.
- Michard, A., Soulaïmani, A., Ouanaïmi, H., Raddi, Y., Brahim, L.A., Rjmati, E.C., Saddiqi, O.: Sagro Group in the Ougnat Massif (Morocco), an evidence for a continuous Cadomian basin along the northern West African Craton. *Comptes Rendus Géosciences*, 349 (2), 81–90, <https://doi.org/10.1016/j.crte.2017.01.001>, 2017.
- Michard, A., Saddiqi, O., Chalouan, A., and de Lamotte, D. F. (Eds.): Continental evolution: The geology of Morocco: Structure, stratigraphy, and tectonics of the Africa-Atlantic-Mediterranean triple junction (Vol. 116). Berlin: Springer, 2008.
- Morris, G.A., Larson, P.B., Hooper, P.R.: ‘Subduction style’ magmatism in a non-subduction setting: the Colville Igneous Complex, NE Washington State, USA. *Journal of Petrology*, 41, 43–67, <https://doi.org/10.1093/petrology/41.1.43>, 2000.
- Mrini, Z.: Chronologie (Rb–Sr, U–Pb), traçage isotopique (Sr–Nd–Pb) des sources de roches magmatiques éburnéenne, panafricaine et hercynienne du Maroc. Un-published thesis. University of Marrakech, Morocco, 200 p, 1993.
- O’Connor, E.A., Barnes, R.P., Beddoe-Stephens, B., Fletcher, T., Gillespie, M.R., Hawkins, M.P., Loughlin, S.C., Smith, M., Smith, R.A., Waters, C.N., Williams, M.: Geology of the Drâa, Kerdous, and Boumalne Districts, Anti-Atlas. ~~Keyworth, Nottingham British Geological Survey, Morocco, p. 324, 2010.~~
- O’Reilly, S. Y., and Griffin, W. L.: Mantle metasomatism. *Metasomatism and the chemical transformation of rock*, 471–533, 2013.
- Ouabid, M., Garrido, C.J.: Widespread Cadomian–Pan-African Ediacaran magmatism across the Moroccan Meseta: implication for the geodynamic evolution of the NW Gondwana margin. *Precambrian Research*, 387, <https://doi.org/10.1016/j.precamres.2023.106992>, 2023.
- Ouguir, H., Macaudière, J., Dagallier, G. : Le Protérozoïque supérieur d’Imiter, Sagro oriental, Maroc : un contexte géodynamique d’arrière-arc. *Journal of African Earth Sciences*, 22 (2), 173–189, [https://doi.org/10.1016/0899-5362\(96\)00002-4](https://doi.org/10.1016/0899-5362(96)00002-4), 1996.





- Pearce, J. A.: Geochemical fingerprinting of oceanic basalts with applications to ophiolite classification and the search for  
 895 Archean oceanic crust. *Lithos*, 100(1-4), 14-48, <https://doi.org/10.1016/j.lithos.2007.06.016>, 2008.
- Pearce, J.: Sources and settings of granitic rocks. *Episodes*, 19, 120-125, 1996.
- Pearce, J. A., Harris, N. B., and Tindle, A. G.: Trace element discrimination diagrams for the tectonic interpretation of granitic rocks. *Journal of petrology*, 25(4), 956-983, <https://doi.org/10.1093/petrology/25.4.956>, 1984.
- Pearce, J. A.: Role of the sub-continental lithosphere in magma genesis at active continental margins. Hawkesworth,  
 900 C.J. and Norry, M.J., eds. *Continental basalts and mantle xenoliths*, Nantwich, Cheshire: Shiva Publications, pp. 230-249,  
 1983.
- Pearce, J. A., and Norry, M. J.: Petrogenetic implications of Ti, Zr, Y, and Nb variations in volcanic rocks. *Contributions to  
 mineralogy and petrology*, 69(1), 33-47, <https://doi.org/10.1007/BF00375192>, 1979.
- Pearce, J. A., and Gale, G. H.: Identification of ore-deposition environment from trace-element geochemistry of associated  
 905 igneous host rocks. *Geological Society, London, Special Publications*, 7(1), 14-24,  
<https://doi.org/10.1144/GSL.SP.1977.007.01.03>, 1977.
- Pelleter, E., Cheilletz, A., Gasquet, D., Mouttaqi, A., Annich, M., Camus, Q., Deloule, E., Ouazzani, L., Bounajma, H.,  
 Ouchtouban, L.: U/Pb ages of magmatism in the Zgounder Epithermal Ag–Hg Deposit, Sirwa Window, Anti-Atlas, Morocco.  
*In: Mineral Deposits of North Africa. Springer*, pp. 143–165, [https://doi.org/10.1007/978-3-319-31733-5\\_5](https://doi.org/10.1007/978-3-319-31733-5_5), 2016.
- 910 Pereira, M. F., El Houicha, M., Chichorro, M., Armstrong, R., Jouhari, A., El Attari, A., and Silva, J. B.: Evidence of a  
 Paleoproterozoic basement in the Moroccan Variscan belt (Rehamna massif, western Meseta). *Precambrian Research*, 268,  
 61-73, <https://doi.org/10.1016/j.precamres.2015.07.010>, 2015.
- Pereira, M.F., Linnemann, U., Hofmann, M., Chichorro, M., Solá, A.R., Medina, J., Silva, J.B.: The provenance of Late  
 Ediacaran and Early Ordovician siliciclastic rocks in the Southwest Central Iberian Zone: constraints from detrital zircon data  
 915 on northern Gondwana margin evolution during the late Neoproterozoic. *Precambrian Research*. 192, 166–189,  
<https://doi.org/10.1016/j.precamres.2011.10.019>, 2012a.
- Rojo-Pérez, E., Arenas, R., Fuenlabrada, J. M., Novo-Fernández, I., Martínez, S. S., Moreno-Martín, D., and Fernández, R.  
 D.: Lower Cambrian magmatism in the SW Iberian sector of the African–Gondwana margin: geochemical and isotopic keys  
 to incipient tectonic switching, <https://doi.org/10.1144/SP542-2022-294>, 2024.
- 920 Saadi, A.: Contribution à l'étude écologique de deux hydrosystèmes temporaires saumâtres du Maroc : Zima et Sedd-El-  
 Messjoun (Bassin de la Bahira). PhD thesis, Semlalia Faculty, University of Cady Ayyad, Marrakech, Morocco, 1985.
- Saccani, E.: A new method of discriminating different types of post-Archean ophiolitic basalts and their tectonic significance  
 using Th-Nb and Ce-Dy-Yb systematics. *Geoscience Frontiers*, 6(4), 481-501, <https://doi.org/10.1016/j.gsf.2014.03.006>,  
 2015.
- 925 Safonova, I., Maruyama, S., Kojima, S., Komiya, T., Krivonogov, S., and Koshida, K.: Recognizing OIB and MORB in  
 accretionary complexes: A new approach based on ocean plate stratigraphy, petrology and geochemistry. *Gondwana  
 Research*, 33, 92-114, <https://doi.org/10.1016/j.gr.2015.06.013>, 2016.



- Samson, S. D., Inglis, J. D., D’Lemos, R. S., Admou, H., Blichert-Toft, J., and Hefferan, K.: Geochronological, geochemical, and Nd–Hf isotopic constraints on the origin of Neoproterozoic plagiogranites in the Tasriwine ophiolite, Anti-Atlas orogen, Morocco. *Precambrian Research*, 135(1-2), 133–147, <https://doi.org/10.1016/j.precamres.2004.08.003>, 2004.
- Saunders, A. D., and Tarney, J.: Geochemical characteristics of basaltic volcanism within back-arc basins. *Geological Society, London, Special Publications*, 16(1), 59-76, <https://doi.org/10.1144/GSL.SP.1984.016.01.05>, 1984.
- Schulte, B., Boger, S.D., Benziane, F., Yazidi, A., Fanning, C.M.: The Ouarzazate Supergroup and its plutonic keel: the relics of an Ediacaran silicic large igneous province in North Africa. *Journal of the Geological Society. London*. 179, 5, <https://doi.org/10.1144/jgs2021-114>, 2022.
- Shand, S. J.: Eruptive rocks; their genesis, composition, classification, and their relation to ore-deposits with a chapter on meteorite. New York: John Wiley & Sons, 1943.
- Sharman, G. R., and Malkowski, M. A.: Modeling apparent Pb loss in zircon U–Pb geochronology. *Geochronology*, 6(1), 37-51, <https://doi.org/10.5194/gchron-6-37-2024>, 2024.
- Shervais, J. W.: Ti-V plots and the petrogenesis of modern and ophiolitic lavas. *Earth and planetary science letters*, 59(1), 101-118, [https://doi.org/10.1016/0012-821X\(82\)90120-0](https://doi.org/10.1016/0012-821X(82)90120-0), 1982.
- Shinjo, R., and Kato, Y.: Geochemical constraints on the origin of bimodal magmatism at the Okinawa Trough, an incipient back-arc basin. *Lithos*, 54(3-4), 117-137, [https://doi.org/10.1016/S0024-4937\(00\)00034-7](https://doi.org/10.1016/S0024-4937(00)00034-7), 2000.
- Soulaimani, A., Ouanaimi, H., Saddiqi, O., Baidder, L., and Michard, A.: The Anti-Atlas Pan-African Belt (Morocco): Overview and pending questions. *Comptes Rendus Géoscience*, <https://doi.org/10.1016/j.crte.2018.07.002>, 2018.
- Stern, R. J.: A reinterpretation of the past 2.5 billion years of Earth’s tectonic history: Two episodes each of plate and single-lid tectonics. *Geological Society of America Bulletin*, <https://doi.org/10.1130/B37966.1>, 2024.
- Sun, S. S., and McDonough, W. F.: Chemical and isotopic systematics of oceanic basalts: implications for mantle composition and processes. *Geological Society, London, Special Publications*, 42(1), (pp. 313-345), <https://doi.org/10.1144/GSL.SP.1989.042.01.19>, 1989.
- Tahiri, A., Montero, P., El Hadi, H., Poyatos, D. M., Azor, A., Bea, F., and Lodeiro, F. G.: Geochronological data on the Rabat–Tiflet granitoids: their bearing on the tectonics of the Moroccan Variscides. *Journal of African Earth Sciences*, 57(1-2), 1-13, <https://doi.org/10.1016/j.jafrearsci.2009.07.005>, 2010.
- Taylor, S. R., and McLennan, S. M.: The geochemical evolution of the continental crust. *Reviews of geophysics*, 33(2), 241-265, <https://doi.org/10.1029/95RG00262>, 1995.
- Thomas, R. J., Fekkak, A., Ennih, N., Errami, E., Loughlin, S. C., Gresse, P. G., Liégeois, J.-P.: A new lithostratigraphic framework for the Anti-Atlas Orogen, Morocco. *Journal of African Earth Sciences*, 39(3-5), 217–226, <https://doi.org/10.1016/j.jafrearsci.2004.07.046>, 2004.
- Thomas, R., Chevallier, L., Gresse, P., Harmer, R., Eglington, B., Armstrong, R., Ingram, B.: Precambrian evolution of the Sirwa Window, Anti-Atlas Orogen, Morocco. *Precambrian Research*, 118(1-2), 1–57, [https://doi.org/10.1016/s0301-9268\(02\)00075-x](https://doi.org/10.1016/s0301-9268(02)00075-x), 2002.



- Thomas, R.J., De Beer, C.H., Chevallier, L.P., De Kock, G.S., Gresse, P.G.: Notice Explicative de la Carte Géologique du Maroc au 1/50 000 feuille Assarag. Notes et Mémoires Service Géologique. Maroc 392, 84, 2000a.
- Touil, A., Hafid, A., Moutte, J., and El Boukhari, A.: Petrology and geochemistry of the Neoproterozoic Siroua granitoids (central Anti-Atlas, Morocco): evolution from subduction-related to within-plate magmatism. **Geological Society, London, Special Publications**, <https://doi.org/10.1144/SP297.13>, 2008.
- Touil, A., El-Boukhari, A., Bilal, E., and Moutte, J. : Les tholeiites a affinité alcaline du secteur ouest du Siroua (Anti-Atlas central, Maroc): témoins d'une distension au Néoprotérozoïque. *Journal of African Earth Sciences*, 29(4), 699-713, [https://doi.org/10.1016/S0899-5362\(99\)00125-6](https://doi.org/10.1016/S0899-5362(99)00125-6), 1999.
- Toummite, A., Liégeois, J.P., Gasquet, D., Bruguier, O., Beraaouz, E.H., Ikenne, M.: Field, geochemistry and Sr-Nd isotopes of the Pan-African granitoids from the Tifnoute Valley (Sirwa, Anti-Atlas, Morocco): a post-collisional event in a metacratonic setting. *Mineralogy and Petrology*. 107 (5), 739–763, <https://doi.org/10.1007/s00710-012-0245-3>, 2013.
- Triantafyllou, A., Berger, J., Baele, J.-M., Diot, H., Ennih, N., Plissart, G., Vandycke, S.: The Tachakoucht–Iri–Tourtit arc complex (Moroccan Anti-Atlas): Neoproterozoic records of polyphased subduction-accretion dynamics during the Pan-African orogeny. *Journal of Geodynamics*, 96, 81–103, <https://doi.org/10.1016/j.jog.2015.07.004>, 2016.
- Tuduri, J., Chauvet, A., Barbanson, L., Bourdier, J.L., Labriki, M., Ennaciri, A., Badra, L., Dubois, M., Ennaciri-Leloix, Ch., Sizaret, S., Maacha, L.: **The Jbel Saghro au (–Ag, Cu) and Ag–Hg Metallogenic Province: product of a Long-Lived Ediacaran Tectono-Magmatic Evolution in the Moroccan Anti-Atlas**. *Minerals*, 8 (12), 592, <https://doi.org/10.3390/min8120592>, 2018.
- Vasey, D. A., Cowgill, E., & Cooper, K. M.: A preliminary framework for magmatism in modern continental back-arc basins and its application to the Triassic–Jurassic tectonic evolution of the Caucasus. *Geochemistry, Geophysics, Geosystems*, 22(6), e2020GC009490, <https://doi.org/10.1029/2020GC009490>, 2021.
- Vermeesch, P.: IsoplotR: A Free and Open Toolbox for Geochronology. *Geoscience Frontiers*. 9 (5), 1479–1493, <https://doi.org/10.1016/j.gsf.2018.04.001>, 2018.
- Walsh, G.J., Aleinikoff, J.N., Harrison, R.W., Yazidi, A., Burton, W.C., Quick, J.E., Benziane, F., Yazidi, A., Saadane, A.: Neoproterozoic tectonic evolution of the Jebel Saghro and Bou Azzer—El Graara inliers, eastern and central Anti-Atlas, Morocco. *Precambrian Research*. 216, 23–62, <https://doi.org/10.1016/j.precamres.2012.06.010>, 2012.
- Walsh, G. J., Aleinikoff, J. N., Benziane, F., Yazidi, A., & Armstrong, T. R.: U–Pb zircon geochronology of the Paleoproterozoic Tagragra de Tata inlier and its Neoproterozoic cover, western Anti-Atlas, Morocco. *Precambrian Research*, 117(1-2), 1-20, [https://doi.org/10.1016/S0301-9268\(02\)00044-X](https://doi.org/10.1016/S0301-9268(02)00044-X), 2002.
- Wilson, M. (Ed.): *Igneous petrogenesis*. Dordrecht: Springer Netherlands, 1989.
- Winchester, J. A., and Floyd, P. A.: Geochemical discrimination of different magma series and their differentiation products using immobile elements. *Chemical geology*, 20, (pp. 325-343), [https://doi.org/10.1016/0009-2541\(77\)90057-2](https://doi.org/10.1016/0009-2541(77)90057-2), 1977.
- Wood, D. A.: The application of a Th-Hf-Ta diagram to problems of tectonomagmatic classification and to establishing the nature of crustal contamination of basaltic lavas of the British Tertiary Volcanic Province. *Earth and planetary science letters*, 50(1), 11-30, [https://doi.org/10.1016/0012-821X\(80\)90116-8](https://doi.org/10.1016/0012-821X(80)90116-8), 1980.



- Yajoui, Z., Karaoui, B., Chew, D., Breitzkreuz, C., Mahmoudi, A.: U–Pb zircon geochronology of the Ediacaran volcano-sedimentary succession of the NE Sagro inlier (Anti-Atlas, Morocco): chronostratigraphic correlation on the northwestern margin of Gondwana. *Gondwana Research*. 87, 263–277, <https://doi.org/10.1016/j.gr.2020.06.015>, 2020.
- Youbi, N., Ernst, R.E., Soderlund, U., Boumehdi, M.A., Ait Lahna, A., Tassinari, C.C.G., El Moume, W., Bensalah, M.K.:  
1000 The Central Iapetus magmatic province: an updated review and link with the ca. 580 Ma Gaskiers glaciation. In: Adatte, T., Bond, D.P.G., Keller, G. (Eds.), *Mass Extinctions, Volcanism, and Impacts: New Developments*: Geological Society of America Special Paper, 544, pp. 35–66, [https://doi.org/10.1130/2020.2544\(02\)](https://doi.org/10.1130/2020.2544(02)), 2020.
